# Supplementary material for: Structural transitions during large ribosomal subunit maturation analyzed by tethered nuclease structure probing in S. cerevisiae
Source: PLoS One. 2017 Jul 7;12(7):e0179405. doi: 10.1371/journal.pone.0179405 (PMC5501410; doi:10.1371/journal.pone.0179405)
Supplement: S1 Table — (XLSX) [file pone.0179405.s013.xlsx]

## Sheet: Oligos
Number	Sequence
O170	AAAGCATTATTGTCCTGTAGTTACAAAGGGGCTACGCTCTCTATCATCTAGATCTAAAGAGTGTTCTAAATCCATGGAAAAGAGAAG
O171	ACTCGACACGGCAAAAATGATTGGCTAACGATAATCGTGGCTCTTTATATACTTAATATATAGGATCTAGTACGACTCACTATAGGG
O205	CATGGCTTAATCTTTGAGAC
O207	TGTTACCTCTGGGCCC
O209	TTTCGCTGCGTTCTTCATC
O210	GGCCAGCAATTTCAAGTTA
O211	GAACATTGTTCGCCTAGA
O212	CTCCGCTTATTGATATGC
O442	TAATACGACTCACTATAGGGCGTACTTGCATTATACCTCAAGC
O1824	TGATCAAATGCCCTTCCC
O1890	CAACTAGAGGCTGTTCACCTTGGA
O2020	ATCTGCCGACGATTATGCTCAATATTTAGATCAAGATTCAGACTCCATGGAAAAGAGAAG
O2021	TAATTTACAACACCGAAGTGTTTAGTTAATGTATTATTATTTTTACGACTCACTATAGGG
O2959	AAATGACGCTCAAACAGGCAT
O3840	GATAACGTTCCAATACGCTCAGT
O3910	TGAGGTCAAACTTTAAGAAC
O3954	PHO-NNNNNNNAGATCGGAAGAGCGTCGTGTAGGGAAAGAGTGT-3NHC3
O3955	AGACGTGTGCTCTTCCGATCTNNNNNNNNS
O3956	AATGATACGGCGACCACCGAGATCTACACTCTTTCCCTACACGACGCT
O3957	CAAGCAGAAGACGGCATACGAGATATTGGCGTGACTGGAGTTCAGACGTGTGCTCTTCCGATCT
O3958	CAAGCAGAAGACGGCATACGAGATTACAAGGTGACTGGAGTTCAGACGTGTGCTCTTCCGATCT
O3959	CAAGCAGAAGACGGCATACGAGATGATCTGGTGACTGGAGTTCAGACGTGTGCTCTTCCGATCT
O3960	CAAGCAGAAGACGGCATACGAGATCTCTACGTGACTGGAGTTCAGACGTGTGCTCTTCCGATCT
O4032	CAAGCAGAAGACGGCATACGAGATTGGTCAGTGACTGGAGTTCAGACGTGTGCTCTTCCGATCT
O4033	CAAGCAGAAGACGGCATACGAGATAAAATGGTGACTGGAGTTCAGACGTGTGCTCTTCCGATCT
O4078	AAAAGTAAAAATGCGAAAAGCAAAGTTTTTAGCATTGAAAATAATTCCATGGAAAAGAGAAG
O4079	GATAATAGTACACAGTTTTTTTGAGAAGATATATGTTAGTTACCGTACGACTCACTATAGGG
O4187	CAAGCAGAAGACGGCATACGAGATGGCCACGTGACTGGAGTTCAGACGTGTGCTCTTCCGATCT
O4188	CAAGCAGAAGACGGCATACGAGATCCGGTGGTGACTGGAGTTCAGACGTGTGCTCTTCCGATCT
O4238	AAATGTCCACGTTCAATTAAG
O4239	TTTCATGGTTTGTATTCACAC
O4240	CGCCGACGTCTCCACATTCAG
O4241	AATTAGACAGTCAGATTCCCC
