# Supplementary material for: Structural transitions during large ribosomal subunit maturation analyzed by tethered nuclease structure probing in S. cerevisiae
Source: PLoS One. 2017 Jul 7;12(7):e0179405. doi: 10.1371/journal.pone.0179405 (PMC5501410; doi:10.1371/journal.pone.0179405)
Supplement: S2 Table — (XLSX) [file pone.0179405.s014.xlsx]

## Sheet: Tabelle1
Plasmid number	Name	Marker genes	Construction/Origin
K375	pT11	AmpR	Reiter et al., 2012
K855	pGAL-rpL27A	LEU2/AmpR	Pöll et al., 2009
K1735	pRPS28_Mnase-HA-rpS5	URA3/AmpR	Ohmayer et al., 2012
K1741	pRPS28_Mnase-HA-rpL27	URA3/AmpR	A BamHI/PstI fragment from plasmid K855 containing the rpL27 coding sequence was cloned into plasmid K1735 which was cleaved with the same restriction enzymes
K1742	pRPS28_Mnase-HA-rpL5	URA3/AmpR	Ohmayer et al., 2012
K1743	pRPS28_Mnase-HA-rpL35	URA3/AmpR	Ohmayer et al., 2012
K1940	pRPS28_Mnase-S-link	URA3/AmpR	Ohmayer et al., 2012
K1941	pRPS28_Mnase-L-link	URA3/AmpR	Ohmayer et al., 2012
K1954	pRPS28_Mnase-HA-rpL27	LEU2/AmpR	A KasI/PstI fragment from plasmid K1741 containing the rpL27 coding sequence was cloned into plasmid Yeplac181
K1955	pRPS28_Mnase-HA-rpL5	LEU2/AmpR	A KasI/PstI fragment from plasmid K1742 containing the rpL5 coding sequence was cloned into plasmid Yeplac181
K1956	pRPS28_Mnase-HA-rpL35	LEU2/AmpR	A KasI/PstI fragment from plasmid K1743 containing the rpL35 coding sequence was cloned into plasmid Yeplac181
K2223	pRPS28_Mnase-S-link-rpL27	URA3/AmpR	A BamHI/PstI fragment from plasmid K855 containing the rpL27 coding sequence was cloned into plasmid K1940 which was cleaved with the same restriction enzymes
K2225	pRPS28_Mnase-L-link-rpL27	URA3/AmpR	A BamHI/PstI fragment from plasmid K855 containing the rpL27 coding sequence was cloned into plasmid K1941 which was cleaved with the same restriction enzymes
	pBS1539	AmpR	Puig et al., 2001
	Yeplac181	LEU2/AmpR	Gietz et al., 1988
