# Supplementary material for: Structural transitions during large ribosomal subunit maturation analyzed by tethered nuclease structure probing in S. cerevisiae
Source: PLoS One. 2017 Jul 7;12(7):e0179405. doi: 10.1371/journal.pone.0179405 (PMC5501410; doi:10.1371/journal.pone.0179405)
Supplement: S3 Table — (XLSX) [file pone.0179405.s015.xlsx]

## Sheet: Yeast Strains
Strain number	Name	Genotype	Plasmid	Generation time (minutes) in YPD determined by OD measurement	Construction/Origin
	BY4741	his3-1 leu2-0 ura3-0 met15-0 Mat_a			Euroscarf
	BY4742	his3-1 leu2-0 ura3-0 lys2-0 Mat_alpha		102	Euroscarf
Y1082	pGAL-RPL27	his3-1 leu2-0 ura3-0 YDR471w::HIS3MX6 YHR010w::kanMX4	K855		Pöll et al., 2009
Y1215	FLAG-rpL27	his3-1 leu2-0 ura3-0 YDR471w::HIS3MX6 YHR010w::kanMX4	K955		Ohmayer et al., 2013
Y2367	MNase-HA-rpL27	his3-1 leu2-0 ura3-0 YDR471w::HIS3MX6 YHR010w::kanMX4	K1741		Strain Y1082 was transformed with plasmid K1741. After selection for uracil prototrophy on plates with galactose as carbon source clones were grown on plates with glucose as carbon source.
Y2570	MNase-HA-rpL35(LEU2)	his3-1 leu2-0 ura3-0 YDL191w::kanMX4 YDL136w::HIS3MX6	K1956		Derivate of Euroscarf strains Y13834 and Y03889, construction was done using a 5-Fluoroorotic acid (5-FoA) sensitive "shuffle" strain as starting point (= Y1002) as described in Pöll et al. 2009 for Y1094. Y1002 was transformed with plasmid K1956 and after selection for leucine prototrophy clones were selected which are 5-Foa resistant
Y2576	Shuffle-RPL27	his3-1 leu2-0 ura3-0 YDR471w::HIS3MX6 YHR010w::kanMX4	K1741		Strain Y2367 was selected for uracil prototroph and leucine auxotroph clones.
Y2579	MNase-HA-rpL27(LEU2)	his3-1 leu2-0 ura3-0 YDR471w::HIS3MX6 YHR010w::kanMX4	K1954		Strain Y2576 was transformed with plasmid K1954 and after selection for leucine prototrophy clones were selected which are resistant to 5-FoA.
Y2592	MNase-HA-rpL35_Noc1-TAP	his3-1 leu2-0 ura3-0 YDL191w::kanMX4 YDL136w::HIS3MX6 NOC1::NOC1-TAP(URA3kl)	K1956	112	The TAP tag coding region together with the URA3 marker gene was amplified from plasmid pBS1539 by PCR with oligonucleotides O2020 and O2021. Strain Y2570 was transformed with this this PCR product and uracile prototroph clones were selected. Expression of the TAP fusion protein was confirmed by western blotting.
Y2593	MNase-HA-rpL35_Noc3-TAP	his3-1 leu2-0 ura3-0 YDL191w::kanMX4 YDL136w::HIS3MX6 NOC3::Noc3-TAP(URA3kl)	K1956	104	The TAP tag coding region together with the URA3 marker gene was amplified from plasmid pBS1539 by PCR with oligonucleotides O170 and O171. Strain Y2570 was transformed with this this PCR product and uracile prototroph clones were selected. Expression of the TAP fusion protein was confirmed by western blotting.
Y2598	MNase-HA-rpL27_Noc1-TAP	his3-1 leu2-0 ura3-0 YDR471w::HIS3MX6 YHR010w::kanMX4 NOC1::NOC1-TAP(URA3kl)	K1954	123	The TAP tag coding region together with the URA3 marker gene was amplified from plasmid pBS1539 by PCR with oligonucleotides O2020 and O2021. Strain Y2579 was transformed with this this PCR product and uracile prototroph clones were selected. Expression of the TAP fusion protein was confirmed by western blotting.
Y2599	MNase-HA-rpL27_Noc3-TAP	his3-1 leu2-0 ura3-0 YDR471w::HIS3MX6 YHR010w::kanMX4 NOC3::NOC3-TAP(URA3kl)	K1954	114	The TAP tag coding region together with the URA3 marker gene was amplified from plasmid pBS1539 by PCR with oligonucleotides O170 and O171. Strain Y2579 was transformed with this this PCR product and uracile prototroph clones were selected. Expression of the TAP fusion protein was confirmed by western blotting.
Y2601	Noc3-TAP	his3­1 leu2­0 ura3­0 NOC3::NOC3-TAP(URA3kl)		103	The TAP tag coding region together with the URA3 marker gene was amplified from plasmid pBS1539 by PCR with oligonucleotides O170 and O171. Strain BY4741 was transformed with this this PCR product and uracile prototroph clones were selected. Expression of the TAP fusion protein was confirmed by western blotting.
Y2604	MNase-HA-rpL5(LEU2)	his3-1 leu2-0 ura3-0 YPL131w::kanMX4	K1955		Derivate of Euroscarf strain Y26478, construction was done using a 5-Fluoroorotic acid (5-Foa) sensitive "shuffle" strain as starting point (= Y861), as described for Y1092 in Pöll et al. 2009. Y861 was transformed with plasmid K1955 and after selection for leucine prototrophy clones were selected which are 5-Foa resistant.
Y2663	MNase-HA-rpL5_Noc1-TAP	his3-1 leu2-0 ura3-0 YPL131w::kanMX4 NOC1::NOC1-TAP(URA3kl)	K1955	111	The TAP tag coding region together with the URA3 marker gene was amplified from plasmid pBS1539 by PCR with oligonucleotides O2020 and O2021. Strain Y2604 was transformed with this this PCR product and uracile prototroph clones were selected. Expression of the TAP fusion protein was confirmed by western blotting.
Y2664	MNase-HA-rpL5_Noc3-TAP	his3-1 leu2-0 ura3-0 YPL131w::kanMX4 NOC3::NOC3-TAP (URA3kl)	K1955	106	The TAP tag coding region together with the URA3 marker gene was amplified from plasmid pBS1539 by PCR with oligonucleotides O170 and O171. Strain Y2604 was transformed with this this PCR product and uracile prototroph clones were selected. Expression of the TAP fusion protein was confirmed by western blotting.
Y2795	Noc1-TAP	his3­1 leu2­0 ura3­0 lys2­0 NOC1::NOC1-TAP(URA3kl)		102	The TAP tag coding region together with the URA3 marker gene was amplified from plasmid pBS1539 by PCR with oligonucleotides O2020 and O2021. Strain BY4742 was transformed with this this PCR product and uracile prototroph clones were selected. Expression of the TAP fusion protein was confirmed by western blotting.
Y2997	MNase-S-Link-rpL27	his3-1 leu2-0 ura3-0 YDR471w::HIS3MX6 YHR010w::kanMX4	K2223		Strain Y1082 was transformed with plasmid K2223. After selection for uracil prototrophy on plates with galactose as carbon source clones were grown on plates with glucose as carbon source.
Y2998	MNase-L-Link-rpL27	his3-1 leu2-0 ura3-0 YDR471w::HIS3MX6 YHR010w::kanMX4	K2225		Strain Y1082 was transformed with plasmid K2225. After selection for uracil prototrophy on plates with galactose as carbon source clones were grown on plates with glucose as carbon source.
Y3389	Lsg1-TAP	his3­1 leu2­0 ura3­0 LSG1::LSG1-TAP(URA3kl)		114	The TAP tag coding region together with the URA3 marker gene was amplified from plasmid pBS1539 by PCR with oligonucleotides O4078 and O4079. Strain YBY4741 was transformed with this this PCR product and uracile prototroph clones were selected. Expression of the TAP fusion protein was confirmed by western blotting.
Y3397	MNase-HA-rpL35_Lsg1-TAP	his3-1 leu2-0 ura3-0 YDL191w::kanMX4 YDL136w::HIS3MX6 LSG1::LSG1-TAP(URA3kl)	K1956	124	The TAP tag coding region together with the URA3 marker gene was amplified from plasmid pBS1539 by PCR with oligonucleotides O4078 and O4079. Strain Y2570 was transformed with this this PCR product and uracile prototroph clones were selected. Expression of the TAP fusion protein was confirmed by western blotting.
Y3405	MNase-HA-rpL27_Lsg1-TAP	his3-1 leu2-0 ura3-0 YDR471w::HIS3MX6 YHR010w::kanMX4 LSG1::LSG1-TAP(URA3kl)	K1954	127	The TAP tag coding region together with the URA3 marker gene was amplified from plasmid pBS1539 by PCR with oligonucleotides O4078 and O4079. Strain Y2579 was transformed with this this PCR product and uracile prototroph clones were selected. Expression of the TAP fusion protein was confirmed by western blotting.
Y3413	MNase-HA-rpL5_Lsg1-TAP	his3-1 leu2-0 ura3-0 YPL131w::kanMX4 LSG1::LSG1-TAP(URA3kl)	K1955	131	The TAP tag coding region together with the URA3 marker gene was amplified from plasmid pBS1539 by PCR with oligonucleotides O4078 and O4079. Strain Y2604 was transformed with this this PCR product and uracile prototroph clones were selected. Expression of the TAP fusion protein was confirmed by western blotting.
