# Supplementary material for: Structural transitions during large ribosomal subunit maturation analyzed by tethered nuclease structure probing in S. cerevisiae
Source: PLoS One. 2017 Jul 7;12(7):e0179405. doi: 10.1371/journal.pone.0179405 (PMC5501410; doi:10.1371/journal.pone.0179405)
Supplement: S4 Table — TCR values and estimates of local noise in termination events were calculated as described in Materials and Methods. (XLSX) [file pone.0179405.s016.xlsx]

## Sheet: Noc3_TAP
Template Position	Legend	L5	L27	L35	Wt	Est. Noise
1		0	0	0	0	0
2		0	0	0	0	0
3		0	0	0	0	1
4		0	0	0	0	1
5		0	0	0	0	1
6		0	0	0	0	1
7		0	0	0	0	0
8		0	0	0	0	0
9		0	0	0	0	0
10		0	0	0	0	0
11		0	0	0	0	0
12		0	0	0	0	0
13		0	0	0	0	0
14		0	0	0	0	0
15		0	0	0	0	1
16		0	0	0	0	1
17		0	0	0	0	1
18		0	0	0	0	1
19		0	0	0	0	1
20		0	0	0	0	1
21		0	0	0	0	1
22		0	0	0	0	1
23		0	0	0	0	0.5
24		0	0	0	0	0.5
25		0	0	0	0	0
26		0	0	0	0	0
27		0	0	0	0	1
28		0	0	0	0	1
29		0	0	0	0	1
30		0	0	0	0	1
31		0	0	0	0	1
32		0	0	0	0	1
33		0	0	0	0	1
34		0	0	0	0	1
35		0	0	0	0	1
36		0	0	0	0	1
37		0	0	0	0	1
38		0	0	0	0	1
39		0	0	0	0	1
40		0	0	0	0	0
41		0	0	0	0	0
42		0	0	0	0	0
43		0	0	0	0	0
44		0	0	0	0	1
45		0	0	0	0	1
46		0	0	0	0	1
47		0	0	0	0	1
48		0	0	0	0	1
49		0	0	0	0	1
50		0	0	0	0	1
51		0	0	0	0	1
52		0	0	0	0	1
53		0	0	0	0	1
54		0	0	0	0	1
55		0	0	0	0	1
56		0	0	0	0	1
57		0	0	0	0	1
58		0	0	0	0	1
59		0	0	0	0	1
60		0	0	0	0	1
61		0	0	0	0	1
62		0	0	0	0	1
63		0	0	0	0	1
64		0	0	0	0	1
65		0	0	0	0	1
66		0	0	0	0	1
67		0	0	0	0	1
68		0	0	0	0	1
69		0	0	0	0	1
70		0	0	0	0	1
71		0	0	0	0	1
72		0	0	0	0	1
73		0	0	0	0	1
74		0	0	0	0	1
75		0	0	0	0	1
76		0	0	0	0	1
77		0	0	0	0	1
78		0	0	0	0	0.5
79		0	0	0	0	1
80		0	0	0	0	1
81		0	0	0	0	1
82		0	0	0	0	1
83		0	0	0	0	1
84		0	0	0	0	1
85		0	0	0	0	1
86		0	0	0	0	1
87		0	0	0	0	1
88		0	0	0	0	1
89		0	0	0	0	1
90		0	0	0	0	1
91		0	0	0	0	1
92		0	0	0	0	1
93		0	0	0	0	1
94		0	0	0	0	1
95		0	0	0	0	1
96		0	0	0	0	0.5
97		0	0	0	0	0.5
98		0	0	0	0	0.5
99		0	0	0	0	0.5
100		0	0	0	0	1
101		0	0	0	0	1
102		0	0	0	0	1
103		0	0	0	0	1
104		0	0	0	0	1
105		0	0	0	0	1
106		0	0	0	0	1
107		0	0	0	0	1
108		0	0	0	0	1
109		0	0	0	0	1
110		0	0	0	0	1
111		0	0	0	0	1
112		0	0	0	0	1
113		0	0	0	0	1
114		0	0	0	0	0.5
115		0	0	0	0	0.5
116		0	0	0	0	0.5
117		0	0	0	0	0.5
118		0	0	0	0	0.5
119		0	0	0	0	0.5
120		0	0	0	0	0.5
121		0	0	0	0	0.5
122		0	0	0	0	0.5
123		0	0	0	0	0.5
124		0	0	0	0	0.5
125		0	0	0	0	0.5
126		0	0	0	0	0.5
127		0	0	0	0	1
128		0	0	0	0	1
129		0	0	0	0	1
130		0	0	0	0	1
131		0	0	0	0	1
132		0	0	0	0	1
133		0	0	0	0	1
134		0	0	0	0	1
135		0	0	0	0	1
136		0	0	0	0	1
137		0	0	0	0	1
138		0	0	0	0	1
139		0	0	0	0	1
140		0	0	0	0	1
141		0	0	0	0	1
142		0	0	0	0	1
143		0	0	0	0	1
144		0	0	0	0	1
145		0	0	0	0	1
146		0	0	0	0	1
147		0	0	0	0	1
148		0	0	0	0	1
149		0	0	0	0	1
150		0	0	0	0	1
151		0	0	0	0	1
152		0	0	0	0	1
153		0	0	0	0	1
154		0	0	0	0	0.5
155		0	0	0	0	0.5
156		0	0	0	0	1
157		0	0	0	0	1
158		0	0	0	0	1
159		0	0	0	0	1
160		0	0	0	0	1
161		0	0	0	0	1
162		0	0	0	0	1
163		0	0	0	0	1
164		0	0	0	0	1
165		0	0	0	0	1
166		0	0	0	0	1
167		0	0	0	0	1
168		0	0	0	0	1
169		0	0	0	0	1
170		0	0	0	0	1
171		0	0	0	0	1
172		0	0	0	0	1
173		0	0	0	0	1
174		0	0	0	0	1
175		0	0	0	0	1
176		0	0	0	0	1
177		0	0	0	0	1
178		0	0	0	0	1
179		0	0	0	0	1
180		0	0	0	0	1
181		0	0	0	0	1
182		0	0	0	0	1
183		0	0	0	0	1
184		0	0	0	0	1
185		0	0	0	0	1
186		0	0	0	0	1
187		0	0	0	0	1
188		0	0	0	0	1
189		0	0	0	0	1
190		0	0	0	0	1
191		0	0	0	0	1
192		0	0	0	0	1
193		0	0	0	0	0.5
194		0	0	0	0	0.5
195		0	0	0	0	0.5
196		0	0	0	0	0.5
197		0	0	0	0	0.5
198		0	0	0	0	0.5
199		0	0	0	0	0.5
200		0	0	0	0	0.5
201		0	0	0	0	0.5
202		0	0	0	0	0.5
203		0	0	0	0	0.5
204		0	0	0	0	0.5
205		0	0	0	0	0.5
206		0	0	0	0	0.5
207		0	0	0	0	1
208		0	0	0	0	1
209		0	0	0	0	1
210		0	0	0	0	1
211		0	0	0	0	1
212		0	0	0	0	1
213		0	0	0	0	0.5
214	ETS1 1	1	1	1	1	0.5
215	ETS1 2	0.0714286	0	0.1	0.428571	0.0666667
216	ETS1 3	0.0666667	0	0.047619	0	0.0666667
217	ETS1 4	0	0	0	0	0.0666667
218	ETS1 5	0	0	0	0	0.0666667
219	ETS1 6	0	0	0	0	0.0666667
220	ETS1 7	0	0	0	0	0.0666667
221	ETS1 8	0	0	0	0	0.0666667
222	ETS1 9	0	0	0	0	0.0666667
223	ETS1 10	0	0	0	0	0.0666667
224	ETS1 11	0	0	0	0	0.0714286
225	ETS1 12	0	0	0	0	0.0714286
226	ETS1 13	0	0	0	0	0.0714286
227	ETS1 14	0	0	0	0	0.0714286
228	ETS1 15	0	0	0	0	0.0714286
229	ETS1 16	0	0	0	0	0.0666667
230	ETS1 17	0	0	0	0	0.0666667
231	ETS1 18	0	0	0	0	0.0666667
232	ETS1 19	0	0	0	0	0.0666667
233	ETS1 20	0	0	0	0	0.0666667
234	ETS1 21	0	0	0	0	0.0666667
235	ETS1 22	0	0	0	0	0.0666667
236	ETS1 23	0	0	0	0	0.0666667
237	ETS1 24	0	0	0	0	0.0666667
238	ETS1 25	0	0	0	0	0.0666667
239	ETS1 26	0	0	0	0	0.0666667
240	ETS1 27	0	0	0	0	0.0666667
241	ETS1 28	0	0	0	0	0.047619
242	ETS1 29	0	0	0	0	0.047619
243	ETS1 30	0	0	0	0	0.047619
244	ETS1 31	0	0	0	0	0.047619
245	ETS1 32	0	0	0	0	0.047619
246	ETS1 33	0	0	0	0	0.047619
247	ETS1 34	0	0	0	0	0.047619
248	ETS1 35	0	0	0	0	0.047619
249	ETS1 36	0	0	0	0	0.047619
250	ETS1 37	0	0	0	0	0.047619
251	ETS1 38	0	0	0	0	0.047619
252	ETS1 39	0	0	0	0	0.047619
253	ETS1 40	0	0	0	0	0.047619
254	ETS1 41	0	0	0	0	0.047619
255	ETS1 42	0	0	0	0	0.047619
256	ETS1 43	0	0	0	0	0.047619
257	ETS1 44	0	0	0	0	0.047619
258	ETS1 45	0	0	0	0	0.047619
259	ETS1 46	0	0	0	0	0.047619
260	ETS1 47	0	0	0	0	0.047619
261	ETS1 48	0	0	0	0	0.047619
262	ETS1 49	0	0	0	0	0.047619
263	ETS1 50	0	0	0	0	0.047619
264	ETS1 51	0	0	0	0	0.047619
265	ETS1 52	0	0	0	0	0.047619
266	ETS1 53	0	0	0	0	0.047619
267	ETS1 54	0	0	0	0	0.047619
268	ETS1 55	0	0	0	0	0
269	ETS1 56	0	0	0	0	0
270	ETS1 57	0	0	0	0	0
271	ETS1 58	0	0	0	0	0
272	ETS1 59	0	0	0	0	0
273	ETS1 60	0	0	0	0	0
274	ETS1 61	0	0	0	0	0
275	ETS1 62	0	0	0	0	0
276	ETS1 63	0	0	0	0	0
277	ETS1 64	0	0	0	0	0
278	ETS1 65	0	0	0	0	0
279	ETS1 66	0	0	0	0	0.047619
280	ETS1 67	0	0	0	0	0.047619
281	ETS1 68	0	0	0	0	0.047619
282	ETS1 69	0	0	0	0	0.047619
283	ETS1 70	0	0	0	0	0.047619
284	ETS1 71	0	0	0	0	0.047619
285	ETS1 72	0	0	0	0	0.047619
286	ETS1 73	0	0	0.0454545	0	0.047619
287	ETS1 74	0	0	0	0	0.047619
288	ETS1 75	0	0	0	0	0.047619
289	ETS1 76	0	0	0	0	0.047619
290	ETS1 77	0	0	0	0	0.047619
291	ETS1 78	0	0	0	0	0.047619
292	ETS1 79	0	0	0	0	0.047619
293	ETS1 80	0	0	0	0	0.047619
294	ETS1 81	0	0	0	0	0.047619
295	ETS1 82	0	0	0	0	0.047619
296	ETS1 83	0	0	0	0	0.047619
297	ETS1 84	0	0	0	0	0.047619
298	ETS1 85	0	0	0	0	0.047619
299	ETS1 86	0	0	0	0	0.047619
300	ETS1 87	0	0	0	0	0.047619
301	ETS1 88	0	0	0	0	0.047619
302	ETS1 89	0	0	0	0	0.047619
303	ETS1 90	0	0	0	0	0.047619
304	ETS1 91	0	0	0	0	0
305	ETS1 92	0	0	0	0	0.0588235
306	ETS1 93	0	0	0	0	0.0588235
307	ETS1 94	0	0	0	0	0.0666667
308	ETS1 95	0	0	0	0	0.0666667
309	ETS1 96	0	0	0	0	0.0666667
310	ETS1 97	0	0	0	0	0.0666667
311	ETS1 98	0	0	0	0	0.0666667
312	ETS1 99	0	0	0	0	0.0625
313	ETS1 100	0	0	0	0	0.0666667
314	ETS1 101	0	0	0	0	0.0666667
315	ETS1 102	0	0	0	0	0.0666667
316	ETS1 103	0	0	0	0	0.0666667
317	ETS1 104	0	0	0	0	0.0833333
318	ETS1 105	0	0	0	0	0.25
319	ETS1 106	0	0	0	0	0.25
320	ETS1 107	0	0	0	0	0.25
321	ETS1 108	0	0	0	0	0.25
322	ETS1 109	0	0	0	0	0.25
323	ETS1 110	0	0	0	0	0.25
324	ETS1 111	0	0	0	0	0.25
325	ETS1 112	0	0	0	0	0.25
326	ETS1 113	0	0	0	0	0.25
327	ETS1 114	0	0	0	0	0.25
328	ETS1 115	0	0	0	0	0.2
329	ETS1 116	0	0	0	0	0.2
330	ETS1 117	0	0	0	0	0.2
331	ETS1 118	0	0	0	0	0.2
332	ETS1 119	0	0	0	0	0.2
333	ETS1 120	0	0	0	0	0.25
334	ETS1 121	0	0	0	0	0.333333
335	ETS1 122	0	0	0.2	0	0.333333
336	ETS1 123	0	0	0	0	0.333333
337	ETS1 124	0	0	0	0	0.333333
338	ETS1 125	0	0	0	0	0.333333
339	ETS1 126	0	0	0	0	0.333333
340	ETS1 127	0	0	0	0	0.333333
341	ETS1 128	0	0	0	0	0.333333
342	ETS1 129	0	0	0	0	0.333333
343	ETS1 130	0	0	0	0	0.333333
344	ETS1 131	0	0	0	0	0.333333
345	ETS1 132	0	0	0	0	0.333333
346	ETS1 133	0	0	0	0	1
347	ETS1 134	0	0	0	0	1
348	ETS1 135	0	0	0	0	1
349	ETS1 136	0	0	0	0	1
350	ETS1 137	0	0	0	0	1
351	ETS1 138	0	0	0	0	0.25
352	ETS1 139	0	0	0	0	0.25
353	ETS1 140	0	0	0	0	0
354	ETS1 141	0	0	0	0	0
355	ETS1 142	0	0	0	0	0
356	ETS1 143	0	0	0	0	0
357	ETS1 144	0	0	0	0	0.333333
358	ETS1 145	0	0	0	0	0.333333
359	ETS1 146	0	0	0	0	0.333333
360	ETS1 147	0	0	0	0	0.333333
361	ETS1 148	0	0	0	0	0.5
362	ETS1 149	0	0	0	0	0.5
363	ETS1 150	0	0	0	0	0.5
364	ETS1 151	0	0	0	0	0.5
365	ETS1 152	0	0	0	0	0.5
366	ETS1 153	0	0	0	0	0.333333
367	ETS1 154	0	0	0	0	0.333333
368	ETS1 155	0	0	0	0	0.333333
369	ETS1 156	0	0	0	0	0.333333
370	ETS1 157	0	0	0	0	0.333333
371	ETS1 158	0	0	0	0	0.5
372	ETS1 159	0	0	0	0	0.5
373	ETS1 160	0	0	0	0	0.5
374	ETS1 161	0	0	0	0	0.5
375	ETS1 162	0	0	0	0	0.5
376	ETS1 163	0	0	0	0	1
377	ETS1 164	0	0	0	0	1
378	ETS1 165	0	0	0	0	1
379	ETS1 166	0	0	0	0	1
380	ETS1 167	0	0	0	0	1
381	ETS1 168	0	0	0	0	1
382	ETS1 169	0	0	0	0	0.5
383	ETS1 170	0	0	0	0	0.5
384	ETS1 171	0	0	0	0	0.5
385	ETS1 172	0	0	0	0	0.5
386	ETS1 173	0	0	0	0	0.5
387	ETS1 174	0	0	0	0	0.333333
388	ETS1 175	0	0	0	0	0.333333
389	ETS1 176	0	0	0	0	0.5
390	ETS1 177	0	0	0	0	0.5
391	ETS1 178	0	0	0	0	0.5
392	ETS1 179	0	0	0	0	0.5
393	ETS1 180	0	0	0	0	0.5
394	ETS1 181	0	0	0	0	0.5
395	ETS1 182	0	0	0	0	0.5
396	ETS1 183	0	0	0	0	0.5
397	ETS1 184	0	0	0	0	0.5
398	ETS1 185	0	0	0	0	0.5
399	ETS1 186	0	0	0	0	0.5
400	ETS1 187	0	0	0	0	0.5
401	ETS1 188	0	0	0	0	1
402	ETS1 189	0	0	0	0	1
403	ETS1 190	0	0	0	0	1
404	ETS1 191	0	0	0	0	1
405	ETS1 192	0	0	0	0	1
406	ETS1 193	0	0	0	0	0.2
407	ETS1 194	0	0	0	0	0.25
408	ETS1 195	0	0	0	0	0.333333
409	ETS1 196	0	0	0	0	0.333333
410	ETS1 197	0	0	0	0	0.333333
411	ETS1 198	0	0	0	0	1
412	ETS1 199	0	0	0	0	1
413	ETS1 200	0	0	0	0	1
414	ETS1 201	0	0	0	0	1
415	ETS1 202	0	0	0	0	1
416	ETS1 203	0	0	0	0	0.25
417	ETS1 204	0	0	0	0	1
418	ETS1 205	0	0	0	0	1
419	ETS1 206	0	0	0	0	1
420	ETS1 207	0	0	0	0	1
421	ETS1 208	0	0	0	0	1
422	ETS1 209	0	0	0	0	0.333333
423	ETS1 210	0	0	0	0	0.333333
424	ETS1 211	0	0	0	0	0.333333
425	ETS1 212	0	0	0	0	0.333333
426	ETS1 213	0	0	0	0	0.333333
427	ETS1 214	0	0	0	0	0.333333
428	ETS1 215	0	0	0	0	0.25
429	ETS1 216	0	0	0	0	0.25
430	ETS1 217	0	0	0	0	1
431	ETS1 218	0	0	0	0	1
432	ETS1 219	0	0	0	0	1
433	ETS1 220	0	0	0	0	1
434	ETS1 221	0	0	0	0	1
435	ETS1 222	0	0	0	0	0.25
436	ETS1 223	0	0	0	0	0.333333
437	ETS1 224	0	0	0	0	0.333333
438	ETS1 225	0	0	0	0	1
439	ETS1 226	0	0	0	0	1
440	ETS1 227	0	0	0	0	1
441	ETS1 228	0	0	0	0	1
442	ETS1 229	0	0	0	0	1
443	ETS1 230	0	0	0	0	1
444	ETS1 231	0	0	0	0	1
445	ETS1 232	0	0	0	0	1
446	ETS1 233	0	0	0	0	1
447	ETS1 234	0	0	0	0	1
448	ETS1 235	0	0	0	0	1
449	ETS1 236	0	0	0	0	0.25
450	ETS1 237	0	0	0	0	0.333333
451	ETS1 238	0	0	0	0	0.333333
452	ETS1 239	0	0	0	0	0.333333
453	ETS1 240	0	0	0	0	0.333333
454	ETS1 241	0	0	0	0	0.333333
455	ETS1 242	0	0	0	0	0.25
456	ETS1 243	0	0	0	0	0.25
457	ETS1 244	0	0	0	0	0.25
458	ETS1 245	0	0	0	0	0.25
459	ETS1 246	0	0	0	0	0.25
460	ETS1 247	0	0	0	0	0.25
461	ETS1 248	0	0	0	0	0.5
462	ETS1 249	0	0	0	0	0.5
463	ETS1 250	0	0	0	0	0.5
464	ETS1 251	0	0	0	0	0.5
465	ETS1 252	0	0	0	0	0.5
466	ETS1 253	0	0	0	0	1
467	ETS1 254	0	0	0	0	1
468	ETS1 255	0	0	0	0	1
469	ETS1 256	0	0	0	0	1
470	ETS1 257	0	0	0	0	1
471	ETS1 258	0	0	0	0	1
472	ETS1 259	0	0	0	0	1
473	ETS1 260	0	0	0	0	1
474	ETS1 261	0	0	0	0	1
475	ETS1 262	0	0	0	0	0.25
476	ETS1 263	0	0	0	0	0.5
477	ETS1 264	0	0	0	0	0.5
478	ETS1 265	0	0	0	0	0.5
479	ETS1 266	0	0	0	0	0.5
480	ETS1 267	0	0	0	0	0.5
481	ETS1 268	0	0	0	0	0.5
482	ETS1 269	0	0	0	0	0.5
483	ETS1 270	0	0	0	0	0.5
484	ETS1 271	0	0	0	0	0.5
485	ETS1 272	0	0	0	0	0.25
486	ETS1 273	0	0	0	0	1
487	ETS1 274	0	0	0	0	1
488	ETS1 275	0	0	0	0	1
489	ETS1 276	0	0	0	0	1
490	ETS1 277	0	0	0	0	1
491	ETS1 278	0	0	0	0	0.2
492	ETS1 279	0	0	0	0	1
493	ETS1 280	0	0	0	0	1
494	ETS1 281	0	0	0	0	1
495	ETS1 282	0	0	0	0	1
496	ETS1 283	0	0	0	0	1
497	ETS1 284	0	0	0	0	1
498	ETS1 285	0	0	0	0	1
499	ETS1 286	0	0	0	0	1
500	ETS1 287	0	0	0	0	1
501	ETS1 288	0	0	0	0	1
502	ETS1 289	0	0	0	0	1
503	ETS1 290	0	0	0	0	1
504	ETS1 291	0	0	0	0	1
505	ETS1 292	0	0	0	0	0.5
506	ETS1 293	0	0	0	0	0.5
507	ETS1 294	0	0	0	0	0.5
508	ETS1 295	0	0	0	0	0.5
509	ETS1 296	0	0	0	0	1
510	ETS1 297	0	0	0	0	1
511	ETS1 298	0	0	0	0	1
512	ETS1 299	0	0	0	0	1
513	ETS1 300	0	0	0	0	1
514	ETS1 301	0	0	0	0	1
515	ETS1 302	0	0	0	0	1
516	ETS1 303	0	0	0	0	1
517	ETS1 304	0	0	0	0	1
518	ETS1 305	0	0	0	0	1
519	ETS1 306	0	0	0	0	1
520	ETS1 307	0	0	0	0	1
521	ETS1 308	0	0	0	0	1
522	ETS1 309	0	0	0	0	1
523	ETS1 310	0	0	0	0	1
524	ETS1 311	0	0	0	0	1
525	ETS1 312	0	0	0	0	1
526	ETS1 313	0	0	0	0	1
527	ETS1 314	0	0	0	0	1
528	ETS1 315	0	0	0	0	0.25
529	ETS1 316	0	0	0	0	1
530	ETS1 317	0	0	0	0	1
531	ETS1 318	0	0	0	0	1
532	ETS1 319	0	0	0	0	1
533	ETS1 320	0	0	0	0	1
534	ETS1 321	0	0	0	0	1
535	ETS1 322	0	0	0	0	1
536	ETS1 323	0	0	0	0	1
537	ETS1 324	0	0	0	0	1
538	ETS1 325	0	0	0	0	1
539	ETS1 326	0	0	0	0	0.5
540	ETS1 327	0	0	0	0	1
541	ETS1 328	0	0	0	0	1
542	ETS1 329	0	0	0	0	1
543	ETS1 330	0	0	0	0	1
544	ETS1 331	0	0	0	0	1
545	ETS1 332	0	0	0	0	1
546	ETS1 333	0	0	0	0	1
547	ETS1 334	0	0	0	0	0.5
548	ETS1 335	0	0	0	0	0.5
549	ETS1 336	0	0	0	0	0.5
550	ETS1 337	0	0	0	0	0.5
551	ETS1 338	0	0	0	0	1
552	ETS1 339	0	0	0	0	1
553	ETS1 340	0	0	0	0	1
554	ETS1 341	0	0	0	0	1
555	ETS1 342	0	0	0	0	1
556	ETS1 343	0	0	0	0	1
557	ETS1 344	0	0	0	0	1
558	ETS1 345	0	0	0	0	1
559	ETS1 346	0	0	0	0	1
560	ETS1 347	0	0	0	0	1
561	ETS1 348	0	0	0	0	1
562	ETS1 349	0	0	0	0	1
563	ETS1 350	0	0	0	0	1
564	ETS1 351	0	0	0	0	1
565	ETS1 352	0	0	0	0	1
566	ETS1 353	0	0	0	0	1
567	ETS1 354	0	0	0	0	1
568	ETS1 355	0	0	0	0	1
569	ETS1 356	0	0	0	0	1
570	ETS1 357	0	0	0	0	1
571	ETS1 358	0	0	0	0	1
572	ETS1 359	0	0	0	0	1
573	ETS1 360	0	0	0	0	1
574	ETS1 361	0	0	0	0	1
575	ETS1 362	0	0	0	0	1
576	ETS1 363	0	0	0	0	1
577	ETS1 364	0	0	0	0	1
578	ETS1 365	0	0	0	0	1
579	ETS1 366	0	0	0	0	1
580	ETS1 367	0	0	0	0	1
581	ETS1 368	0	0	0	0	1
582	ETS1 369	0	0	0	0	1
583	ETS1 370	0	1	0	0	0.5
584	ETS1 371	0	0	0	0	0.5
585	ETS1 372	0	0	0	0	0.5
586	ETS1 373	0	0	0	0	0.5
587	ETS1 374	0	0	0	0	0.6
588	ETS1 375	0	0	0	0	0.6
589	ETS1 376	0	0	0	0	0.6
590	ETS1 377	0	0	0	0	0.6
591	ETS1 378	0	0	0	0	0.6
592	ETS1 379	0	0	0	0	0.5
593	ETS1 380	0	0	0	0	0.5
594	ETS1 381	0	0	0	0	0.5
595	ETS1 382	0	0	0	0	0.5
596	ETS1 383	0	0	0	0	0.5
597	ETS1 384	0	0	0	0	0.5
598	ETS1 385	0	0	0	0	0.5
599	ETS1 386	0	0	0	0	1
600	ETS1 387	0	0	0	0	1
601	ETS1 388	0	0	0	0	1
602	ETS1 389	0	0	0	0	1
603	ETS1 390	0	0	0	0	1
604	ETS1 391	0	0	0	0	0.666667
605	ETS1 392	0	0	0	0	1
606	ETS1 393	0	0	0	0	1
607	ETS1 394	0	0	0	0	1
608	ETS1 395	0	0	0	0	1
609	ETS1 396	0	0	0	0	1
610	ETS1 397	0	0	0	0	0.5
611	ETS1 398	0	0	0	0	0.5
612	ETS1 399	0	0	0	0	1
613	ETS1 400	0	0	0	0	1
614	ETS1 401	0	0	0	0	1
615	ETS1 402	0	0	0	0	1
616	ETS1 403	0	0	0	0	1
617	ETS1 404	0	0	0	0	1
618	ETS1 405	0	0	0	0	1
619	ETS1 406	0	0	0	0	1
620	ETS1 407	0	0	0	0	0.5
621	ETS1 408	0	0.333333	0	0	0.5
622	ETS1 409	0	0	0	0	0.5
623	ETS1 410	0	0	0	0	0.5
624	ETS1 411	0	0	0	0	0.5
625	ETS1 412	0	0	0	0	0.5
626	ETS1 413	0	0	0	0	0.5
627	ETS1 414	0	0	0	0	0.5
628	ETS1 415	0	0	0	0	0.5
629	ETS1 416	0	0	0	0	1
630	ETS1 417	0	0	0	0	1
631	ETS1 418	0	0	0	0	1
632	ETS1 419	0	0	0	0	1
633	ETS1 420	0	0	0	0	1
634	ETS1 421	0	0	0	0	1
635	ETS1 422	0	0	0	0	1
636	ETS1 423	0	0	0	0	1
637	ETS1 424	0	0	0	0	0.5
638	ETS1 425	0	0	0	0	0.5
639	ETS1 426	0	0	0	0	0.5
640	ETS1 427	0	0	0	0	0.5
641	ETS1 428	0	0	0	0	0.5
642	ETS1 429	0	0	0	0	0.5
643	ETS1 430	0	0	0	0	0.5
644	ETS1 431	0	0	0	0	0.5
645	ETS1 432	0	0	0	0	1
646	ETS1 433	0	0	0	0	1
647	ETS1 434	0	0	0	0	1
648	ETS1 435	0	0	0	0	1
649	ETS1 436	0	0	0	0	1
650	ETS1 437	0	0	0	0	0.333333
651	ETS1 438	0	0	0	0	0.333333
652	ETS1 439	0	0	0	0	0.333333
653	ETS1 440	0	0	0	0	0.333333
654	ETS1 441	0	0	0	0	0.666667
655	ETS1 442	0	0	0	0	0.666667
656	ETS1 443	0	0	0	0	1
657	ETS1 444	0	0	0	0	1
658	ETS1 445	0	0	0	0	1
659	ETS1 446	0	0	0	0	1
660	ETS1 447	0	0	0	0	1
661	ETS1 448	0	0	0	0	1
662	ETS1 449	0	0	0	0	1
663	ETS1 450	0	0	0	0	1
664	ETS1 451	0	0	0	0	1
665	ETS1 452	0	0	0	0	1
666	ETS1 453	0	0	0	0	1
667	ETS1 454	0	0	0	0	1
668	ETS1 455	0	0	0	0	1
669	ETS1 456	0	0	0	0	1
670	ETS1 457	0	0	0	0	1
671	ETS1 458	0	0	0	0	1
672	ETS1 459	0	0	0	0	1
673	ETS1 460	0	0	0	0	1
674	ETS1 461	0	0	0	0	1
675	ETS1 462	0	0	0	0	1
676	ETS1 463	0	0	0	0	1
677	ETS1 464	0	0	0	0	1
678	ETS1 465	0	0	0	0	1
679	ETS1 466	0	0	0	0	1
680	ETS1 467	0	0	0	0	1
681	ETS1 468	0	0	0.333333	0	1
682	ETS1 469	0	0	0	0	1
683	ETS1 470	0	0	0	0	1
684	ETS1 471	0.5	0	0	0	1
685	ETS1 472	0	0	0.25	0	1
686	ETS1 473	0	0.25	0	0	1
687	ETS1 474	0	0	0	0	1
688	ETS1 475	0	0	0	0	1
689	ETS1 476	0	0	0	0	0.5
690	ETS1 477	0	0	0	0	0.5
691	ETS1 478	0	0	0	0	0.5
692	ETS1 479	0	0	0	0	0.5
693	ETS1 480	0	0	0	0	0.4
694	ETS1 481	0	0	0	0	0.75
695	ETS1 482	0	0	0	0	1
696	ETS1 483	0	0	0.2	0	1
697	ETS1 484	0	0	0	0	1
698	ETS1 485	0	0	0	0	1
699	ETS1 486	0	0	0	0	1
700	ETS1 487	0	0	0	0	1
701	ETS1 488	0	0	0	0	1
702	ETS1 489	0	0	0	0	1
703	ETS1 490	0	0	0	0	1
704	ETS1 491	0	0	0	0	1
705	ETS1 492	0	0	0	0	1
706	ETS1 493	0	0	0	0	1
707	ETS1 494	0	0	0	0	1
708	ETS1 495	0	0	0	0	1
709	ETS1 496	0	0	0	0	1
710	ETS1 497	0	0	0	0	1
711	ETS1 498	0	0	0	0	1
712	ETS1 499	0	0	0	0	1
713	ETS1 500	0	0	0	0	1
714	ETS1 501	0	0	0	0	1
715	ETS1 502	0	0	0	0	1
716	ETS1 503	0	0	0	0	1
717	ETS1 504	0	0	0	0	1
718	ETS1 505	0	0	0	0	1
719	ETS1 506	0	0	0	0	1
720	ETS1 507	0	0	0	0	1
721	ETS1 508	0	0	0	0	1
722	ETS1 509	0	0	0	0	1
723	ETS1 510	0	0	0	0	1
724	ETS1 511	0	0	0	0	1
725	ETS1 512	0	0	0	0	1
726	ETS1 513	0	0	0	0	1
727	ETS1 514	0	0	0	0	1
728	ETS1 515	0	0	0	0	1
729	ETS1 516	0	0	0	0	1
730	ETS1 517	0	0	0	0	1
731	ETS1 518	0	0	0	0	1
732	ETS1 519	0	0	0	0	1
733	ETS1 520	0	0	0	0	1
734	ETS1 521	0	0	0	0	1
735	ETS1 522	0	0	0	0	1
736	ETS1 523	0	0	0	0	1
737	ETS1 524	0	0	0	0	1
738	ETS1 525	0	0	0	0	1
739	ETS1 526	0	0	0	0	1
740	ETS1 527	0	0	0	0	1
741	ETS1 528	0	0	0	0	1
742	ETS1 529	0	0	0	0	1
743	ETS1 530	0	0	0	0	1
744	ETS1 531	0	0	0	0	1
745	ETS1 532	0	0	0	0	1
746	ETS1 533	0	0	0	0	1
747	ETS1 534	0	0	0	0	1
748	ETS1 535	0	0	0	0	1
749	ETS1 536	0	0	0	0	1
750	ETS1 537	0	0	0	0	1
751	ETS1 538	0	0	0	0	1
752	ETS1 539	0	0	0	0	1
753	ETS1 540	0	0	0	0	1
754	ETS1 541	0	0	0	0	1
755	ETS1 542	0	0	0	0	1
756	ETS1 543	0	0	0	0	1
757	ETS1 544	0	0	0	0	1
758	ETS1 545	0	0	0	0	1
759	ETS1 546	0	0	0	0	1
760	ETS1 547	0	0	0	0	1
761	ETS1 548	0	0	0	0	1
762	ETS1 549	0	0	0	0	1
763	ETS1 550	0	0	0	0	1
764	ETS1 551	0	0	0	0	1
765	ETS1 552	0	0	0	0	1
766	ETS1 553	0	0	0	0	1
767	ETS1 554	0	0	0	0	1
768	ETS1 555	0	0	0	0	1
769	ETS1 556	0	0	0	0	1
770	ETS1 557	0	0	0	0	1
771	ETS1 558	0	0	0	0	1
772	ETS1 559	0	0	0	0	1
773	ETS1 560	0	0	0	0	1
774	ETS1 561	0	0	0	0	1
775	ETS1 562	0	0	0	0	1
776	ETS1 563	0	0	0	0	1
777	ETS1 564	0	0	0	0	1
778	ETS1 565	0	0	0	0	1
779	ETS1 566	0	0	0	0	1
780	ETS1 567	0	0	0	0	1
781	ETS1 568	0	0	0	0	1
782	ETS1 569	0	0	0	0	1
783	ETS1 570	0	0	0	0	0.6
784	ETS1 571	0	0	0	0	0.714286
785	ETS1 572	0	0	0	0	0.714286
786	ETS1 573	0	0	0	0	0.714286
787	ETS1 574	0	0	0	0	0.714286
788	ETS1 575	0	0	0	0	0.714286
789	ETS1 576	0	0	0	0	0.454545
790	ETS1 577	0	0	0	0	0.333333
791	ETS1 578	0	0	0	0	0.333333
792	ETS1 579	0	0	0	0	0.263158
793	ETS1 580	0	0.333333	0	0	0.1875
794	ETS1 581	0	0	0	0	0.214286
795	ETS1 582	0	0	0	0	0.214286
796	ETS1 583	0	0	0	0	0.235294
797	ETS1 584	0	0	0	0	0.235294
798	ETS1 585	0	0	0	0	0.235294
799	ETS1 586	0	0	0	0	0.235294
800	ETS1 587	0	0	0	0	0.235294
801	ETS1 588	0	0	0	0	0.185185
802	ETS1 589	0	0	0	0	0.185185
803	ETS1 590	0	0	0	0	0.185185
804	ETS1 591	0	0	0	0	0.185185
805	ETS1 592	0	0	0	0	0.181818
806	ETS1 593	0.5	0	0	0	0.15
807	ETS1 594	0	0	0	0	0.16
808	ETS1 595	0	0	0	0	0.16
809	ETS1 596	0	0	0	0	0.181818
810	ETS1 597	0	0	0	0	0.181818
811	ETS1 598	0	0	0	0	0.208333
812	ETS1 599	0	0	0	0	0.208333
813	ETS1 600	0	0	0	0	0.208333
814	ETS1 601	0	0	0	0	0.208333
815	ETS1 602	0	0	0	0	0.25
816	ETS1 603	0	0	0	0	0.25
817	ETS1 604	0	0	0	0	0.25
818	ETS1 605	0	0	0	0	0.25
819	ETS1 606	0	0	0	0	0.25
820	ETS1 607	0	0	0	0	0.172414
821	ETS1 608	0	0	0	0	0.172414
822	ETS1 609	0	0	0	0	0.166667
823	ETS1 610 (A0)	0	0	0	0	0.166667
824	ETS1 611	0	0	0	0	0.166667
825	ETS1 612	0	0	0	0	0.131579
826	ETS1 613	0	0	0	0	0.131579
827	ETS1 614	0	0	0	0	0.153846
828	ETS1 615	0	0	0	0	0.153846
829	ETS1 616	0	0	0	0	0.163934
830	ETS1 617	0	0	0	0	0.203704
831	ETS1 618	0	0	0	0	0.203704
832	ETS1 619	0	0	0	0	0.203704
833	ETS1 620	0	0	0	0	0.203704
834	ETS1 621	0	0	0	0	0.203704
835	ETS1 622	0	0	0	0	0.15942
836	ETS1 623	0	0	0.25	0	0.15942
837	ETS1 624	0	0	0	0	0.15942
838	ETS1 625	0	0	0	0	0.118421
839	ETS1 626	0	0	0	0	0.0933333
840	ETS1 627	0	0	0	0	0.0933333
841	ETS1 628	0	0	0	0	0.0813954
842	ETS1 629	0	0	0	0	0.0813954
843	ETS1 630	0	0	0	0	0.088
844	ETS1 631	0	0	0	0	0.088
845	ETS1 632	0	0	0	0	0.0987654
846	ETS1 633	0	0	0	0	0.0987654
847	ETS1 634	0	0	0	0	0.0987654
848	ETS1 635	0	0	0	0	0.12
849	ETS1 636	0	0	0	0	0.12
850	ETS1 637	0	0	0	0	0.12
851	ETS1 638	0	0	0	0	0.12
852	ETS1 639	0	0	0	0	0.12
853	ETS1 640	0.5	0	0	0	0.0967742
854	ETS1 641	0	0	0	0	0.0736842
855	ETS1 642	0	0	0	0	0.0736842
856	ETS1 643	0	0	0	0	0.0736842
857	ETS1 644	0	0	0	0	0.0714286
858	ETS1 645	0	0	0	0	0.0819672
859	ETS1 646	0	0	0	0	0.0819672
860	ETS1 647	0	0	0	0	0.0819672
861	ETS1 648	0	0	0	0	0.0819672
862	ETS1 649	0	0	0	0	0.0819672
863	ETS1 650	0	0	0	0	0.0619469
864	ETS1 651	0	0	0.5	0	0.06
865	ETS1 652	0	0	0	0	0.06
866	ETS1 653	0	0	0	0	0.06
867	ETS1 654	0	0	0	0	0.0514706
868	ETS1 655	0	0	0	0	0.0514706
869	ETS1 656	0	0	0	0	0.0606061
870	ETS1 657	0	0	0	0	0.0606061
871	ETS1 658	0	0	0	0	0.0606061
872	ETS1 659	0	0	0	0	0.0606061
873	ETS1 660	0	0	0	0	0.0606061
874	ETS1 661	0	0	0	0	0.0555556
875	ETS1 662	0	0.5	0	0	0.0517241
876	ETS1 663	0	0	0	0	0.0517241
877	ETS1 664	0	0	0	0	0.0666667
878	ETS1 665	0	0	0	0	0.0666667
879	ETS1 666	0	0	0	0	0.0666667
880	ETS1 667	0	0	0	0	0.0703125
881	ETS1 668	0	0	0	0	0.114754
882	ETS1 669	0	0	0	0	0.114754
883	ETS1 670	0	0	0	0	0.114754
884	ETS1 671	0	0	0	0	0.114754
885	ETS1 672	0	0	0	0	0.114754
886	ETS1 673	0	0	0	0	0.0578512
887	ETS1 674	0	0	0	0	0.0538462
888	ETS1 675	0	0	0	0	0.047619
889	ETS1 676	0	0	0	0	0.047619
890	ETS1 677	0	0	0	0	0.0555556
891	ETS1 678	0	0	0	0	0.0555556
892	ETS1 679	0	0	0	0	0.0555556
893	ETS1 680	0	0	0	0	0.0779221
894	ETS1 681	0	0	0	0	0.0779221
895	ETS1 682	0	0	0	0	0.0779221
896	ETS1 683	0	0	0	0	0.0779221
897	ETS1 684	0	0	0	0	0.0779221
898	ETS1 685	0	0	0	0	0.0478723
899	ETS1 686	0	0	0	0	0.0478723
900	ETS1 687	0	0	0	0	0.0475059
901	ETS1 688	0	0	0	0	0.0511364
902	ETS1 689	0	0	0	0	0.0511364
903	ETS1 690	0	0	0	0	0.0511364
904	ETS1 691	0	0	0	0	0.0511364
905	ETS1 692	0	0	0	0	0.0511364
906	ETS1 693	0	0	0	0	0.0566038
907	ETS1 694	0	0	0	0	0.056872
908	ETS1 695	0	0	0	0	0.0779817
909	ETS1 696	0	0	0.333333	0	0.0779817
910	ETS1 697	0	0	0.25	0	0.0779817
911	ETS1 698	0.5	0.333333	0.2	1	0.0779817
912	ETS1 699	0.6	0.571429	0.642857	0.75	0.0779817
913	ETS1 700	0.615385	0.588235	0.5	0.428571	0.0633484
914	18S 1	0.913333	0.690909	0.83908	0.815789	0.0464286
915	18S 2	0.132948	0.0983607	0.179245	0.40625	0.0464286
916	18S 3	0.01983	0.031746	0.0139535	0.0724638	0.0464286
917	18S 4	0.0056338	0	0	0	0.0464286
918	18S 5	0	0	0.00462963	0	0.0392157
919	18S 6	0	0	0	0	0.0392157
920	18S 7	0.00280899	0	0	0.0142857	0.0397351
921	18S 8	0.00280112	0.015625	0.00460829	0	0.0397351
922	18S 9	0	0	0.00458716	0	0.0397351
923	18S 10	0	0	0.00456621	0	0.0397351
924	18S 11	0.0027933	0.0447761	0.00904977	0	0.0407524
925	18S 12	0	0	0.0045045	0	0.0407524
926	18S 13	0	0	0	0	0.0407524
927	18S 14	0	0	0.00892857	0	0.0407524
928	18S 15	0	0	0	0	0.0407524
929	18S 16	0.00278552	0	0	0.0140845	0.0308989
930	18S 17	0	0	0	0	0.0328358
931	18S 18	0	0	0	0	0.0328358
932	18S 19	0.00277778	0	0	0	0.034188
933	18S 20	0	0	0	0	0.0413625
934	18S 21	0.00552486	0.0147059	0.00444444	0	0.0413625
935	18S 22	0.0242588	0.0684932	0.0217391	0.123457	0.0413625
936	18S 23	0.00536193	0.0135135	0.00862069	0	0.0413625
937	18S 24	0.0261097	0.038961	0.0491803	0.0240964	0.0413625
938	18S 25	0.00260417	0	0.0121457	0	0.0402299
939	18S 26	0.284916	0.421053	0.277778	0.484472	0.0359897
940	18S 27	0.0146789	0.0431655	0.0446927	0.0473373	0.0359897
941	18S 28	0.10802	0.371041	0.113861	0.407018	0.0322581
942	18S 29	0.0453125	0.338323	0.123644	0.24	0.0322581
943	18S 30	0.00621118	0.037464	0.0170576	0.00530504	0.0209895
944	18S 31	0	0.011396	0	0.0104987	0.0209895
945	18S 32	0	0.00847458	0.00212766	0.0026178	0.0209895
946	18S 33	0	0	0	0.00261097	0.0274869
947	18S 34	0	0.0111732	0.00212314	0.00777202	0.0274869
948	18S 35	0.00309598	0.00555556	0.00211864	0.00258398	0.0274869
949	18S 36	0.00615385	0	0	0	0.0274869
950	18S 37	0.00763359	0	0.00631579	0.00514139	0.0274869
951	18S 38	0.010574	0.00826446	0.00210084	0.0025641	0.0208914
952	18S 39	0.106613	0.0620155	0.0383838	0.0692124	0.0201884
953	18S 40	0.0159363	0.0202532	0.00801603	0.0187354	0.0221932
954	18S 41	0.0105125	0.00753769	0.0272904	0.004662	0.025066
955	18S 42	0.00131234	0.0074813	0.00194553	0	0.025066
956	18S 43	0.0342205	0.0520095	0.0481481	0.022779	0.025066
957	18S 44	0.00629723	0	0.0217391	0.00227273	0.025066
958	18S 45	0.00251256	0.00235849	0.00719424	0	0.025066
959	18S 46	0.0160692	0.0207852	0.0211268	0.0350877	0.0180879
960	18S 47	0.00979192	0.00688073	0.0121739	0.00436681	0.019037
961	18S 48	0.00122249	0	0.00173611	0.00650759	0.0224586
962	18S 49	0.001221	0	0	0	0.02589
963	18S 50	0	0.00228833	0	0	0.02589
964	18S 51	0.0179856	0.00907029	0.0204082	0.0233051	0.02589
965	18S 52	0.0011976	0	0	0	0.02589
966	18S 53	0	0.00451467	0	0.00421941	0.02589
967	18S 54	0.00119617	0	0	0	0.0200753
968	18S 55	0.047836	0.0513919	0.0248756	0.0246914	0.0196078
969	18S 56	0.00340522	0.00213675	0.00495049	0.00409836	0.0189349
970	18S 57	0.00339367	0.0105708	0.00164745	0.00408163	0.0189349
971	18S 58	0.0045045	0.00421053	0.00654664	0.00406504	0.0169312
972	18S 59	0	0.00210084	0	0	0.0169312
973	18S 60	0.00448431	0	0.00650406	0	0.0169312
974	18S 61	0.0132743	0.00209644	0.00324149	0.0257426	0.0190476
975	18S 62	0.00768386	0.00417537	0.00644122	0.00197628	0.0190476
976	18S 63	0.00762527	0	0.00321027	0	0.0190476
977	18S 64	0.00217391	0.00208333	0.00479233	0	0.0190476
978	18S 65	0.0139335	0.0123457	0.00634921	0.00784314	0.0190476
979	18S 66	0.00320513	0	0.00473934	0.00195695	0.0152403
980	18S 67	0.0105708	0.0181818	0.00627944	0.0135135	0.0156098
981	18S 68	0.00421053	0.00402414	0.00778816	0	0.0156098
982	18S 69	0.00314795	0.00400802	0.00155521	0.00192678	0.0156098
983	18S 70	0.00104822	0.00399202	0.00618238	0.00574713	0.0156098
984	18S 71	0.0185185	0.0176471	0.019697	0.0242991	0.0156098
985	18S 72	0.028	0.0135397	0.0322581	0.0110906	0.015015
986	18S 73	0.0128332	0.0226843	0.0172911	0.00733945	0.014014
987	18S 74	0.0222008	0.011215	0.048011	0.0144665	0.0168993
988	18S 75	0.0416281	0.0377698	0.0713376	0.00539568	0.0168993
989	18S 76	0.0484155	0.0413793	0.0850816	0.0463122	0.0168993
990	18S 77	0.0113142	0.00684932	0.016055	0.00511945	0.0168993
991	18S 78	0.00605536	0.00680272	0.00796359	0.0167785	0.0168993
992	18S 79	0	0	0.00227015	0.00500835	0.0156356
993	18S 80	0.00687285	0.0150754	0.00676437	0.00498339	0.0232558
994	18S 81	0.00171527	0.00167224	0.00337079	0.00495868	0.0232558
995	18S 82	0.00171233	0.00333333	0.00780379	0	0.0232558
996	18S 83	0	0.00166389	0.00222469	0.00493421	0.0232558
997	18S 84	0.00764656	0.00331675	0.00991189	0.00327869	0.0232558
998	18S 85	0.00338696	0.00330579	0.00438596	0	0.01875
999	18S 86	0.00169062	0.00493421	0.0119177	0.00489396	0.0162162
1000	18S 87	0.00168776	0	0.00431499	0	0.0161597
1001	18S 88	0.00252525	0.00327869	0.00107759	0	0.0161597
1002	18S 89	0.000841043	0.00326797	0.00107643	0.00162866	0.0218688
1003	18S 90	0	0.00163132	0	0	0.0218688
1004	18S 91	0.00251678	0.00162866	0.00107527	0	0.0274936
1005	18S 92	0.00251046	0.00162602	0.00958466	0.00162602	0.0285987
1006	18S 93	0.00167084	0.00485437	0.0157233	0.00324149	0.0285987
1007	18S 94	0.00333056	0	0.00728408	0	0.0285987
1008	18S 95	0.0033195	0.00161551	0.0102987	0.0128	0.0285987
1009	18S 96	0	0.00322061	0.00715746	0.00159744	0.0285987
1010	18S 97	0	0.00798722	0.00204082	0.00476948	0.0359965
1011	18S 98	0.00413223	0.0157233	0.0160643	0.00788643	0.0359965
1012	18S 99	0.00900901	0.0363636	0.0138614	0.0261137	0.0359965
1013	18S 100	0.301887	0.358601	0.321692	0.417189	0.0359965
1014	18S 101	0.472239	0.804855	0.643439	0.766269	0.0359965
1015	18S 102	0.0360675	0.0580564	0.0491803	0.0549733	0.0127916
1016	18S 103	0.0134864	0.0125243	0.0119235	0.0163392	0.0127916
1017	18S 104	0.00570613	0.00526408	0.00847647	0.00541691	0.0127916
1018	18S 105	0.00113993	0.000701385	0.00111408	0.00308582	0.0109863
1019	18S 106	0.003125	0.00122592	0.00111284	0.000192827	0.0109863
1020	18S 107	0.0025503	0.00035014	0.000444939	0.000578146	0.0112775
1021	18S 108	0.0208102	0.0069541	0.00860168	0.00973282	0.0112775
1022	18S 109	0.002491	0.00260101	0.00395431	0.00209484	0.0125029
1023	18S 110	0.00165792	0.00155817	0.00284775	0.0015212	0.0153634
1024	18S 111	0.00165517	0	0.000875465	0.000570125	0.0204035
1025	18S 112	0.00902132	0.0039662	0.00479198	0.0095991	0.0204035
1026	18S 113	0.00272628	0.00343702	0.00520043	0.00486983	0.0204035
1027	18S 114	0.00136129	0.00222908	0.00173048	0.000748643	0.0204035
1028	18S 115	0.00271518	0.00136986	0.00129618	0.00112171	0.0204035
1029	18S 116	0.00216743	0.00153872	0.00150992	0.00130695	0.0156076
1030	18S 117	0.00135281	0.00170678	0.00129255	0.00167754	0.0156076
1031	18S 118	0.00162075	0.00085266	0.00236407	0.00148893	0.0100267
1032	18S 119	0.0122732	0.0042452	0.00598163	0.00885446	0.00892061
1033	18S 120	0.000533333	0.000509165	0.000640478	0.00147357	0.00554939
1034	18S 121	0.00345469	0.00220152	0.00573127	0.00183857	0.00554939
1035	18S 122	0.000531209	0.000676934	0.000848356	0.000183824	0.00487373
1036	18S 123	0.000265534	0.000338352	0.000423998	0.000551167	0.00484368
1037	18S 124	0.00238411	0.00135158	0.00527204	0.00183385	0.00436491
1038	18S 125	0.000794071	0.000675333	0.000842815	0.00146493	0.00553877
1039	18S 126	0.00395465	0.000843455	0.00189274	0.00201023	0.00553877
1040	18S 127	0.000527009	0.000337268	0.000630517	0.00109529	0.00553877
1041	18S 128	0.000526732	0.000674082	0.00125945	0.000364963	0.00553877
1042	18S 129	0.000263296	0.000336927	0.000629327	0.000182448	0.00553877
1043	18S 130	0	0.000336814	0.000419375	0.000364764	0.00475573
1044	18S 131	0.00105208	0.000841326	0.00167469	0.000364631	0.0048667
1045	18S 132	0.00131337	0.00117647	0.00188048	0.0010927	0.0048667
1046	18S 133	0.0152613	0.0108063	0.0331313	0.00326738	0.00509446
1047	18S 134	0.0147808	0.00808048	0.0282686	0.00469738	0.00509446
1048	18S 135	0.0528602	0.0336255	0.0848006	0.180364	0.00509446
1049	18S 136	0.00718907	0.00286032	0.00907958	0.0145921	0.00509446
1050	18S 137	0.00310559	0.00126964	0.00195451	0.00479233	0.00509446
1051	18S 138	0.00522814	0.000951324	0.00283487	0.00347323	0.00465806
1052	18S 139	0.000949668	0.000475436	0.00123872	0.000289352	0.00465806
1053	18S 140	0.00894118	0.00300205	0.00528076	0.00302899	0.00473348
1054	18S 141	0.000705384	0.000631612	0.000351927	0.000432526	0.00473348
1055	18S 142	0.00304735	0.00487115	0.00280751	0.00301854	0.00475108
1056	18S 143	0.00117069	0.00047118	0.00192644	0.000431034	0.00496483
1057	18S 144	0.000701919	0.000314021	0.0015737	0.000574383	0.00496483
1058	18S 145	0.0115634	0.00344234	0.00849515	0.00627854	0.00496483
1059	18S 146	0.00276753	0.00093794	0.00293863	0.000712962	0.00496483
1060	18S 147	0.00184162	0.000624902	0.00103609	0.00256009	0.0067402
1061	18S 148	0.00252583	0.00140406	0.00361321	0.00142025	0.0067402
1062	18S 149	0.000459031	0	0.000343997	0.000567779	0.0067402
1063	18S 150	0.000229463	0.000311915	0.000859254	0	0.0067402
1064	18S 151	0.00022941	0.000155933	0.000343584	0	0.0067402
1065	18S 152	0.000229358	0.00109034	0.000686695	0.000850943	0.0052356
1066	18S 153	0.00297279	0.00310559	0.00563332	0.00296946	0.0052356
1067	18S 154	0.00182607	0.00139557	0.00187425	0.000424028	0.00485535
1068	18S 155	0.00182274	0.000929512	0.000851209	0.000706215	0.00521147
1069	18S 156	0.00498753	0.000773994	0.00254712	0.00295733	0.00639616
1070	18S 157	0.00518719	0.00277864	0.00858586	0.00238831	0.00639616
1071	18S 158	0.00337154	0.00200277	0.00402482	0.00140292	0.00639616
1072	18S 159	0.00336022	0.00107725	0.0038423	0.000841043	0.00639616
1073	18S 160	0.00134228	0	0.00116803	0.000280269	0.00639616
1074	18S 161	0.00267738	0.00138313	0.00166583	0.00167879	0.00484626
1075	18S 162	0.00598802	0.00245286	0.00282392	0.00694637	0.00455716
1076	18S 163	0.00110767	0.00183627	0.00198939	0.00138735	0.00765907
1077	18S 164	0.00221043	0.00107001	0.000993707	0.000693193	0.00955352
1078	18S 165	0.000662691	0.00106887	0.00115798	0.0002772	0.00955352
1079	18S 166	0.00154389	0.000305297	0.000330743	0.000277123	0.00955352
1080	18S 167	0.00110156	0.000305204	0.000826173	0.000692329	0.00955352
1081	18S 168	0.00329381	0.00243568	0.00181428	0.0031746	0.00955352
1082	18S 169	0.00849118	0.00454614	0.00720485	0.00124087	0.00680537
1083	18S 170	0.00173875	0.000605785	0.00179797	0.00137684	0.00597763
1084	18S 171	0.012449	0.00286922	0.00633425	0.0117023	0.00682464
1085	18S 172	0.000857817	0.00105597	0.00113563	0.00135888	0.00682464
1086	18S 173	0.0664665	0.0239988	0.0274535	0.0291557	0.00682464
1087	18S 174	0.00616793	0.00235018	0.00267506	0.00250033	0.00682464
1088	18S 175	0.00277778	0.00453283	0.0040746	0.00249409	0.00727476
1089	18S 176	0.00138696	0.000876552	0.00281294	0.000262467	0.00815268
1090	18S 177	0.00414365	0.00276807	0.00233863	0.00157233	0.00815268
1091	18S 178	0.00588466	0.00449601	0.00742804	0.00352526	0.00815268
1092	18S 179	0.0171583	0.0077709	0.0110193	0.013651	0.00815268
1093	18S 180	0.00479662	0.00472644	0.00623574	0.00256904	0.00815268
1094	18S 181	0.00306044	0.000715615	0.00273058	0.00128287	0.00785675
1095	18S 182	0.00305111	0.000572164	0.00151469	0.00128123	0.00785675
1096	18S 183	0.000952562	0.00185608	0.0015124	0.000640205	0.00785675
1097	18S 184	0	0.00028547	0.000302389	0.000511902	0.00677656
1098	18S 185	0.00171168	0.000570613	0.000906344	0.00115045	0.00637988
1099	18S 186	0.00019015	0.000285225	0.000302024	0.000127812	0.00637988
1100	18S 187	0.000380156	0.000142592	0.00045283	0.000127796	0.00625335
1101	18S 188	0.00170778	0	0.000150921	0.000255526	0.00625335
1102	18S 189	0	0.000142572	0.000150898	0	0.00625335
1103	18S 190	0.000189717	0.000142552	0.000452489	0.00025546	0.00554661
1104	18S 191	0.00302629	0.000285022	0.000904159	0.000255395	0.00698934
1105	18S 192	0.00489366	0.00113895	0.00792464	0.00368957	0.0125808
1106	18S 193	0.00225522	0.0017077	0.00209049	0.00165205	0.0125808
1107	18S 194	0.000938791	0.000426743	0.000149298	0.000381098	0.0125808
1108	18S 195	0.00112634	0.00142328	0.0020908	0.0017771	0.0125808
1109	18S 196	0.000375375	0.000284657	0.000895522	0.000380662	0.0125808
1110	18S 197	0.00187336	0.00056899	0.00134148	0.000253711	0.00814573
1111	18S 198	0.00391864	0.000710833	0.00312082	0.0021519	0.00790922
1112	18S 199	0.00186254	0.00113604	0.00192821	0.000506073	0.00727334
1113	18S 200	0.000558763	0.000284091	0.00118571	0.000379507	0.00727334
1114	18S 201	0.00148782	0.00028401	0.000592505	0.000379363	0.00727334
1115	18S 202	0.00609982	0.00634965	0.0041304	0.00728094	0.00727334
1116	18S 203	0.00147656	0.00225257	0.00162003	0.00212953	0.00844371
1117	18S 204	0.00257732	0.00518207	0.00381455	0.00262369	0.00844371
1118	18S 205	0.00147059	0.00167785	0.00175747	0.00261682	0.00986031
1119	18S 206	0.0393784	0.0128364	0.0147186	0.0304458	0.00986031
1120	18S 207	0.00544433	0.00247831	0.00359454	0.00361141	0.0113673
1121	18S 208	0.0028021	0.0034303	0.00386709	0.00168249	0.0113673
1122	18S 209	0.00104969	0.00137024	0.00143021	0.00144006	0.0113673
1123	18S 210	0.0144828	0.00517993	0.0061123	0.00962681	0.0113673
1124	18S 211	0.00394985	0.00149721	0.00269351	0.00130564	0.0113673
1125	18S 212	0.0034229	0.00149497	0.00183954	0.000830171	0.00711629
1126	18S 213	0.00561607	0.00244035	0.00408681	0.00472144	0.00707965
1127	18S 214	0.00186852	0.00310853	0.00224972	0.00200259	0.00575816
1128	18S 215	0.00875568	0.00390415	0.00767406	0.00375543	0.00575816
1129	18S 216	0.0129633	0.00495646	0.0114483	0.00641325	0.00473111
1130	18S 217	0.010199	0.0136099	0.00956284	0.0142529	0.00473111
1131	18S 218	0.00734814	0.0082558	0.00718839	0.00537327	0.00473111
1132	18S 219	0.00390371	0.00313521	0.00539593	0.00137002	0.00500391
1133	18S 220	0.00291923	0.00195567	0.0055004	0.00102646	0.00500391
1134	18S 221	0.0045205	0.00286011	0.00440764	0.00136674	0.00500391
1135	18S 222	0.00418006	0.00272268	0.0053142	0.00238609	0.00500391
1136	18S 223	0.00416266	0.00258632	0.00344234	0.00215419	0.00573022
1137	18S 224	0.00382775	0.00154939	0.00343053	0.00192373	0.00573022
1138	18S 225	0.0288104	0.0111083	0.00992815	0.0119633	0.00573022
1139	18S 226	0.00431832	0.00343555	0.00493956	0.00312082	0.00750733
1140	18S 227	0.00169361	0.00139771	0.001687	0.000445633	0.0107189
1141	18S 228	0.000461681	0.000634921	0.000259471	0.000222767	0.0107189
1142	18S 229	0.00138313	0.00114155	0.00194225	0.000222717	0.0107189
1143	18S 230	0.000460829	0.000380373	0.000129467	0.000111346	0.0107189
1144	18S 231	0.000153586	0	0.000646914	0	0.0107189
1145	18S 232	0.000767342	0.000633553	0.00167915	0.000667631	0.00798334
1146	18S 233	0.000613497	0.000506586	0.000516396	0.000111259	0.00798334
1147	18S 234	0.00107247	0.00252653	0.00180412	0.00222025	0.00717596
1148	18S 235	0.000612464	0.000631233	0	0.000332926	0.00694034
1149	18S 236	0.00168144	0.000756907	0.00205761	0.000110963	0.0116857
1150	18S 237	0.000305623	0.000630358	0.00115607	0	0.0154001
1151	18S 238	0.0137151	0.0202569	0.0177896	0.0135727	0.0154001
1152	18S 239	0.00270555	0.00295567	0.00276799	0.00218436	0.0154001
1153	18S 240	0.00538197	0.00208922	0.00425958	0.0021796	0.0154001
1154	18S 241	0.0046131	0.00196247	0.00362002	0.000653452	0.0154001
1155	18S 242	0.000594884	0.00110267	0.000499189	0.000544247	0.0113507
1156	18S 243	0.000743052	0.00061222	0.000872818	0.000761366	0.00807137
1157	18S 244	0.00532151	0.00158924	0.00360293	0.00152042	0.00807137
1158	18S 245	0.000738552	0.000244439	0.000992925	0.000434216	0.00688589
1159	18S 246	0.000147689	0.000366524	0.00111579	0.000542476	0.00648801
1160	18S 247	0.00323863	0.00207267	0.00345935	0.00205717	0.00648365
1161	18S 248	0.00146994	0.00133934	0.00283356	0.00108155	0.00699301
1162	18S 249	0.00468179	0.00351856	0.00429343	0.00172749	0.00699301
1163	18S 250	0.00204409	0.000606281	0.00134754	0.00129394	0.00699301
1164	18S 251	0.0729561	0.0270175	0.0317875	0.0360669	0.00699301
1165	18S 252	0.00898726	0.00352692	0.00612991	0.00403727	0.00699301
1166	18S 253	0.0115354	0.00456407	0.00550996	0.00892582	0.0069087
1167	18S 254	0.00828402	0.00604862	0.0134166	0.00276243	0.00627587
1168	18S 255	0.00288449	0.00174176	0.00563542	0.00163432	0.00666489
1169	18S 256	0.00741801	0.00450815	0.0050349	0.00498018	0.00761955
1170	18S 257	0.00607942	0.00322618	0.00907132	0.0020286	0.00907179
1171	18S 258	0.000646329	0.000920916	0.00101948	0.000810783	0.00907179
1172	18S 259	0.00283578	0.00149425	0.0028239	0.00111359	0.00907679
1173	18S 260	0.00269958	0.00412088	0.00483363	0.00292722	0.0119952
1174	18S 261	0.00435172	0.00342231	0.00224316	0.00151179	0.0119952
1175	18S 262	0.00318959	0.00261691	0.00357622	0.00241303	0.0119952
1176	18S 263	0.00101963	0.000454907	0.000446828	0.00040201	0.0119952
1177	18S 264	0.00114577	0.000568311	0.000669792	0.00050226	0.0119952
1178	18S 265	0.00114446	0.000795003	0.00133779	0.000200864	0.00740045
1179	18S 266	0.00152362	0.00090775	0.00289017	0.000301205	0.00620989
1180	18S 267	0.00164786	0.00203827	0.00365489	0.002104	0.00638538
1181	18S 268	0.000506778	0.000452745	0.000664084	0.000200341	0.00638538
1182	18S 269	0.00075959	0.000791676	0.000774165	0.000500601	0.00638538
1183	18S 270	0.000126582	0.000678119	0.000331675	0.00030027	0.00638538
1184	18S 271	0.00428535	0.00248027	0.00242638	0.00159888	0.00638538
1185	18S 272	0.0010073	0.000225428	0.00110169	0.00019982	0.00669062
1186	18S 273	0.00201056	0.00314607	0.00329417	0.00269031	0.0106978
1187	18S 274	0.00150565	0.00112233	0.00043903	0.000298835	0.0106978
1188	18S 275	0.000752257	0.000112221	0.000109745	9.96016e-05	0.0106978
1189	18S 276	0.000375987	0.000224391	0.000548426	0.000298716	0.0106978
1190	18S 277	0.000876534	0.000336474	0.000986518	0.000597074	0.0106978
1191	18S 278	0.00137586	0.00078449	0.00153223	0.000298448	0.00754993
1192	18S 279	0.00124922	0.000448079	0.00153022	0.000894721	0.00609027
1193	18S 280	0.00286497	0.000895355	0.00283379	0.00158809	0.00609027
1194	18S 281	0.000622432	0.000111907	0.000979965	0.000396865	0.00609027
1195	18S 282	0.00037332	0	0.000217723	0.000198393	0.00609027
1196	18S 283	0.00111871	0.000782735	0.000870133	0	0.00575954
1197	18S 284	0.00568533	0.00400936	0.00659103	0.00424733	0.00611477
1198	18S 285	0.00160415	0.002998	0.00226391	0.00147944	0.00800743
1199	18S 286	0.000246731	0	0.000215564	0.000197219	0.0085401
1200	18S 287	0.000616447	0	0.000215517	0	0.0085401
1201	18S 288	0.00123138	0.000776656	0.00161377	0.000591308	0.0085401
1202	18S 289	0.00073828	0.000332742	0.000645092	0.000984543	0.0085401
1203	18S 290	0.00355566	0.00419704	0.00609105	0.00314064	0.0085401
1204	18S 291	0.00061267	0.000110436	0.000747464	0.000294349	0.00598596
1205	18S 292	0.000612295	0.000220824	0.000960102	0	0.00597426
1206	18S 293	0.00146735	0.000331126	0.000639659	0.000294262	0.00412513
1207	18S 294	0.000366703	0.000441306	0.000426257	9.80777e-05	0.00412513
1208	18S 295	0.0414763	0.0077723	0.0166614	0.0106734	0.00412513
1209	18S 296	0.00501282	0.00272926	0.00583394	0.002806	0.00409463
1210	18S 297	0.00221007	0.00152605	0.00311559	0.00154574	0.00409463
1211	18S 298	0.00162583	0.000980072	0.00155537	0.00115797	0.0035413
1212	18S 299	0.0195833	0.00336445	0.00700165	0.00470611	0.0035413
1213	18S 300	0.00329097	0.000650759	0.00277236	0.00105536	0.00327203
1214	18S 301	0.00271616	0.000975187	0.00153783	0.000958497	0.00380654
1215	18S 302	0.000678579	0.000866082	0.00122875	0.000383252	0.00457385
1216	18S 303	0.000339175	0.000108249	0.000818498	0.000191589	0.00466045
1217	18S 304	0.00033906	0.00054095	0.00143032	0.000478744	0.00466045
1218	18S 305	0	0.000108178	0.00020429	9.57396e-05	0.00466045
1219	18S 306	0.000113007	0.000108167	0.000306341	0.000191443	0.00466045
1220	18S 307	0.000338906	0	0.000408288	9.57121e-05	0.00466045
1221	18S 308	0.000338792	0.000108155	0	0.000191388	0.00392627
1222	18S 309	0.000112918	0	0	0	0.00392627
1223	18S 310	0.000225785	0	0	9.56846e-05	0.00392627
1224	18S 311	0.000789622	0.000108143	0.00081591	0	0.00392627
1225	18S 312	0.00191398	0.00108026	0.00223873	0.001624	0.00392627
1226	18S 313	0.00213483	0.000863465	0.0024363	0.000381971	0.00373462
1227	18S 314	0.00145887	0.000323729	0.000304476	0.000190949	0.00373216
1228	18S 315	0.0162287	0.00215355	0.00865278	0.00266616	0.00366893
1229	18S 316	0.00297193	0.000538097	0.00190821	0.00114134	0.00366893
1230	18S 317	0.000330106	0.000215216	0.00080281	0.000190186	0.00366893
1231	18S 318	0.000439947	0.000107596	0.000300963	0.00019015	0.00366893
1232	18S 319	0.000329852	0.000537692	0.000902075	0.000760023	0.00366893
1233	18S 320	0.0020847	0.000644815	0.0029979	0.00113874	0.00404126
1234	18S 321	0.000438693	0.000107458	0.00039956	0	0.00446713
1235	18S 322	0.000657606	0.000322269	0	0.000284603	0.00446713
1236	18S 323	0.000328695	0.0002148	9.98801e-05	9.48587e-05	0.00446713
1237	18S 324	0.000109553	0.000107388	0.000399361	9.48497e-05	0.00446713
1238	18S 325	0.000985006	0.000965562	0.0015949	0.000947598	0.00446713
1239	18S 326	0.000437589	0.000214523	0.000298954	0	0.00405299
1240	18S 327	0.000109385	0	9.96413e-05	0.000189484	0.00405117
1241	18S 328	0.000983499	0.000428862	0.00129366	0.000757361	0.00381396
1242	18S 329	0.00152755	0.00117798	0.0020854	0.000851305	0.00380429
1243	18S 330	0.000109099	0	9.9295e-05	0	0.00555148
1244	18S 331	0.00239443	0.00053516	0.00247623	0.000850581	0.00727046
1245	18S 332	0.000435161	0.00064178	0.001681	9.45001e-05	0.00727046
1246	18S 333	0.0016292	0.000641368	0.00148104	0.00028342	0.00727046
1247	18S 334	0.000108601	0	0.000296121	0	0.00727046
1248	18S 335	0	0.000106883	0.000591891	9.44644e-05	0.00727046
1249	18S 336	0.000542711	0.000213721	0.000985513	9.44555e-05	0.00453795
1250	18S 337	0.000433981	0.000106849	0.000492514	9.44465e-05	0.00444996
1251	18S 338	0.00140845	0.000106838	0.000295421	0	0.00421984
1252	18S 339	0.000216638	0	0.000295334	0	0.00397959
1253	18S 340	0.000108307	0	0.000295247	0	0.00397959
1254	18S 341	0.000541243	0.000853971	0.000393507	0.000566358	0.00397959
1255	18S 342	0.00021645	0	0	9.43841e-05	0.00397959
1256	18S 343	0.000216403	0	9.83671e-05	0	0.00397959
1257	18S 344	0.00215936	0.00149222	0.00245314	0.00131963	0.0033367
1258	18S 345	0.000215889	0.000213129	0.000294291	0	0.0033367
1259	18S 346	0.000647249	0.000851789	0.00166487	0.000282699	0.0033367
1260	18S 347	0.000431313	0.000212902	0	9.42241e-05	0.0033367
1261	18S 348	0.00247392	0.000957141	0.00234489	0.000941442	0.00283573
1262	18S 349	0.000430061	0	0.00107359	0.000188253	0.0031997
1263	18S 350	0.000966702	0.000212653	0.0017537	9.41176e-05	0.00381105
1264	18S 351	0.0033187	0.000956023	0.00107056	0.00197257	0.00430086
1265	18S 352	0.0246424	0.00612331	0.0118292	0.00551144	0.00430086
1266	18S 353	0.00249974	0.000738475	0.00230282	0.000653473	0.00430086
1267	18S 354	0.000624545	0	0.000575374	0.000279981	0.00430086
1268	18S 355	0.00269906	0.0037835	0.00515169	0.00214193	0.00430086
1269	18S 356	0.00103702	0.000105097	0.000667493	0.000372405	0.00409074
1270	18S 357	0.000414637	0	0.000762268	0.000186168	0.00409074
1271	18S 358	0.000828586	0.000420212	0.00180711	0.000558191	0.00353029
1272	18S 359	0.00165546	0.000315159	0.00095039	0.000186116	0.00316738
1273	18S 360	0.000624805	0.000105887	0.000573778	0	0.0030684
1274	18S 361	0	0.000105887	0	0	0.00295247
1275	18S 362	0.00259902	0.00148038	0.00248139	0.000844515	0.00309087
1276	18S 363	0.00108613	0.000337648	0.000701895	0.000300451	0.00309087
1277	18S 364	0.00111383	0.000115754	0.00143399	0.00051282	0.00309087
1278	18S 365	0.00134394	0.000349243	0.00205973	0.000617729	0.00311593
1279	18S 366	0.00633914	0.0025286	0.0077212	0.00263769	0.00311593
1280	18S 367	0.00135885	0.000602482	0.000940242	0.000844505	0.00311593
1281	18S 368	0.000566958	0.000603209	0.000837433	0.000211595	0.00311593
1282	18S 369	0.00229859	0.000367422	0.00116947	0.00118203	0.00349096
1283	18S 370	0.00256542	0.00110773	0.00166528	0.000977278	0.00420091
1284	18S 371	0.00258809	0.00290909	0.00371893	0.00350095	0.00519831
1285	18S 372	0.00064711	0.00136364	0.00233199	0.00117555	0.00534759
1286	18S 373	0.000882029	0.000493583	0.000654165	0	0.00599793
1287	18S 374	0.0151018	0.00297767	0.0087146	0.00297493	0.00599793
1288	18S 375	0.00370693	0.00493827	0.00906736	0.00633446	0.00599793
1289	18S 376	0.000654022	0.000987167	0.000431593	0.00126529	0.00599793
1290	18S 377	0.00087165	0	0.00107852	0.000421585	0.00599793
1291	18S 378	0.00152306	0.000986193	0.00172265	0.000421407	0.0049173
1292	18S 379	0.000434972	0	0.000215285	0.000421407	0.00514648
1293	18S 380	0.000218531	0	0.000648368	0.000423012	0.00514648
1294	18S 381	0	0.000995025	0.000216169	0	0.00628084
1295	18S 382	0.00130976	0	0.00129562	0.00127011	0.00628084
1296	18S 383	0.00109027	0.00248139	0.00150927	0.00253378	0.00628084
1297	18S 384	0.000218007	0.000496032	0.000861698	0	0.00628084
1298	18S 385	0.000436205	0	0.000215889	0	0.00628084
1299	18S 386	0.000218055	0	0	0	0.00448229
1300	18S 387	0.000218007	0.0004995	0.000431593	0.0012728	0.00448229
1301	18S 388	0.00021796	0	0	0.000847817	0.00448229
1302	18S 389	0	0	0.000862999	0	0.00447027
1303	18S 390	0	0	0.000434028	0	0.00447027
1304	18S 391	0.000223764	0.000558036	0	0	0.00447027
1305	18S 392	0	0	0	0	0.00384287
1306	18S 393	0.000223814	0	0	0	0.00384287
1307	18S 394	0	0	0	0	0.00384287
1308	18S 395	0.000223764	0	0.000223914	0	0.00393507
1309	18S 396	0.000223764	0	0.000671291	0.000465333	0.00393507
1310	18S 397	0.000895656	0.00055991	0.000447628	0.000465983	0.00393507
1311	18S 398	0	0.00111857	0.00111832	0	0.00434153
1312	18S 399	0.000447628	0.000558971	0.000893855	0	0.00434153
1313	18S 400	0.000223764	0	0.000223414	0	0.00486618
1314	18S 401	0.000223714	0	0.000446628	0.000465766	0.00713087
1315	18S 402	0.000447227	0	0.000446429	0	0.00871369
1316	18S 403	0.000223564	0.00334448	0.000669195	0.000930665	0.00871369
1317	18S 404	0	0	0	0	0.00871369
1318	18S 405	0.000223514	0	0	0	0.00871369
1319	18S 406	0	0	0.000223015	0	0.00871369
1320	18S 407	0.00111657	0	0.000891266	0	0.00695297
1321	18S 408	0	0	0	0	0.00695297
1322	18S 409	0.000223264	0	0.000222767	0	0.00386473
1323	18S 410	0.00200535	0.000557103	0.00111259	0.00139405	0.00558122
1324	18S 411	0.000668747	0	0	0	0.00933333
1325	18S 412	0.0013363	0.000558971	0.00177738	0.002792	0.012248
1326	18S 413	0.00133482	0.00055991	0.000444642	0.000465333	0.012248
1327	18S 414	0.000222668	0.00111919	0.00044484	0	0.012248
1328	18S 415	0.00155625	0.00279018	0.0035461	0.000931099	0.012248
1329	18S 416	0.00199689	0.00167131	0.000664452	0.000930233	0.012248
1330	18S 417	0.000890472	0.00281057	0.00221976	0	0.00755144
1331	18S 418	0.000445534	0	0.000887902	0	0.00731433
1332	18S 419	0.000668003	0	0.00110865	0.000469263	0.00731433
1333	18S 420	0.00155729	0.00338409	0.00573825	0.00702247	0.00659755
1334	18S 421	0.194006	0.359652	0.282678	0.30405	0.00659755
1335	18S 422	0.0164195	0.0302178	0.0238464	0.027345	0.00659755
1336	18S 423	0.00369588	0.00385289	0.00524044	0.00348985	0.00451467
1337	18S 424	0.0019322	0.00384347	0.00261378	0.000950872	0.00579523
1338	18S 425	0.00350079	0.00348554	0.00276031	0.00442338	0.00579523
1339	18S 426	0.000699912	0.000696621	0.000153374	0.000315856	0.00579523
1340	18S 427	0	0	0.000155087	0.000320205	0.00579523
1341	18S 428	0.00446429	0.00391083	0.0016239	0.00527241	0.00579523
1342	18S 429	0.00148671	0.00195236	0.0016218	0.00245442	0.00487359
1343	18S 430	0.00037154	0	0.000162153	0.000350508	0.00576369
1344	18S 431	0	0.000391236	0.000162311	0.000351124	0.00793273
1345	18S 432	0.0105224	0.00702302	0.00871811	0.0052687	0.00822043
1346	18S 433	0.00111732	0.00118157	0.00147083	0.000356761	0.00822043
1347	18S 434	0.00148782	0.000787402	0.00114304	0.00284596	0.00822043
1348	18S 435	0.000985222	0.00205761	0.00136822	0.00222883	0.00822043
1349	18S 436	0.0428333	0.033557	0.0277178	0.0393927	0.00822043
1350	18S 437	0.130696	0.367196	0.192055	0.319238	0.00774704
1351	18S 438	0.0266521	0.0418617	0.0293221	0.0270643	0.0073828
1352	18S 439	0.0046066	0.00685683	0.00467085	0.00166113	0.00665587
1353	18S 440	0.000554017	0.000548998	0.000585052	0.00193638	0.00559668
1354	18S 441	0.000369276	0.0024644	0.00116908	0.00248344	0.00542594
1355	18S 442	0.000922339	0.000273748	0.000584197	0.00110254	0.00503168
1356	18S 443	0.0003688	0.000820569	0	0.000275558	0.00554221
1357	18S 444	0.00092115	0.000546747	0.000292013	0.000825991	0.00554221
1358	18S 445	0.00220588	0.001365	0.00131234	0.00192361	0.00554221
1359	18S 446	0.000918274	0.000272926	0.000437254	0.000823723	0.00554221
1360	18S 447	0.000550661	0.00109051	0.00014573	0.00109709	0.00554221
1361	18S 448	0	0	0	0.000274198	0.00566728
1362	18S 449	0	0	0	0	0.00566728
1363	18S 450	0.00110011	0	0.000873617	0	0.00566728
1364	18S 451	0.0010989	0.00108932	0.000582072	0.000821918	0.00566728
1365	18S 452	0.00346779	0.00352782	0.00203311	0.00191414	0.00566728
1366	18S 453	0.000729528	0.0010843	0.00029036	0.000546597	0.00451426
1367	18S 454	0.00127505	0.000541859	0.00043535	0.000819224	0.00451426
1368	18S 455	0.00054615	0.00108254	0.000290149	0	0.00451426
1369	18S 456	0.00848375	0.00538358	0.00346971	0.00516164	0.00451426
1370	18S 457	0.000721501	0.00107556	0.000433526	0.00189805	0.00451426
1371	18S 458	0	0.000268817	0.000722022	0	0.00413818
1372	18S 459	0.000540833	0	0.000144383	0.000271076	0.00413818
1373	18S 460	0.0030559	0.00348245	0.00273618	0.00243375	0.00408962
1374	18S 461	0.00107739	0.000267809	0.000575705	0.0010805	0.00408962
1375	18S 462	0.00107643	0.000802998	0.000719114	0.000270051	0.00408962
1376	18S 463	0.000541418	0.000267809	0.000288392	0.000270636	0.00408962
1377	18S 464	0.000695572	0.000312305	0.00125045	0.000656383	0.00408962
1378	18S 465	0	0	0	0	0.00372406
1379	18S 466	0	0	0.000189861	0	0.00372406
1380	18S 467	0	0	0.000969744	0	0.00363636
1381	18S 468	0.000534045	0.000325521	0.000981547	0.00034626	0.00412053
1382	18S 469	0	0	0.000392465	0.000692042	0.00412053
1383	18S 470	0.0106129	0.00162655	0.00411361	0.00276243	0.00412053
1384	18S 471	0.0021254	0	0.00117624	0	0.00412053
1385	18S 472	0.00185627	0	0.000587774	0.000690131	0.00412053
1386	18S 473	0.00343643	0.000651254	0.00136959	0.00275387	0.00365631
1387	18S 474	0.000795334	0	0.000392234	0	0.00365631
1388	18S 475	0.0013238	0.000977199	0.00039208	0	0.00311042
1389	18S 476	0	0	0.000587774	0	0.00311042
1390	18S 477	0.0010582	0.000325839	0.0011744	0.00103306	0.00311042
1391	18S 478	0.00105848	0	0.000978282	0	0.00311042
1392	18S 479	0.00026462	0	0.00039116	0	0.00289321
1393	18S 480	0.00026455	0	0	0	0.00289321
1394	18S 481	0.00026448	0	0.000586396	0	0.00309438
1395	18S 482	0.00026441	0	0.000195427	0	0.00309438
1396	18S 483	0.00026434	0	0.000390701	0.000688468	0.00309438
1397	18S 484	0	0	0	0	0.00309438
1398	18S 485	0.00131996	0.000651678	0.000780792	0	0.00311769
1399	18S 486	0	0.000325733	0.00019516	0.00137504	0.00311769
1400	18S 487	0	0	0	0	0.00311769
1401	18S 488	0	0	0	0	0.00311769
1402	18S 489	0	0	0.000195122	0	0.00355691
1403	18S 490	0.000263922	0	0	0	0.00355691
1404	18S 491	0.000527704	0	0	0	0.00355691
1405	18S 492	0.00105513	0.000325733	0.000585252	0	0.00355691
1406	18S 493	0.000798297	0.000326797	0.00137363	0	0.00355691
1407	18S 494	0.00053234	0	0.000588581	0	0.00332651
1408	18S 495	0	0	0.000589739	0	0.00284385
1409	18S 496	0.00080171	0.000326691	0.00117809	0	0.00284385
1410	18S 497	0.000801068	0.000326584	0.000392619	0	0.00284385
1411	18S 498	0.00053376	0	0.000588581	0.000346141	0.00284974
1412	18S 499	0.00372241	0.00195567	0.00585137	0.00276148	0.00284974
1413	18S 500	0.00502646	0.00486539	0.00984936	0.00241047	0.00284974
1414	18S 501	0.0127971	0.012492	0.0187607	0.0159268	0.00284974
1415	18S 502	0.00104357	0.000320205	0.00170261	0.000677277	0.00305421
1416	18S 503	0.000521512	0.000320102	0.000189143	0.000338524	0.00305421
1417	18S 504	0	0	0.000378143	0	0.00305421
1418	18S 505	0.000781657	0	0.000378	0.00101454	0.00307141
1419	18S 506	0.000781047	0.000639795	0.000566679	0.000338066	0.00307141
1420	18S 507	0.000780437	0	0	0	0.00307141
1421	18S 508	0.000260078	0.000319795	0.000188857	0	0.00435177
1422	18S 509	0.00026001	0	0.000377572	0	0.00755477
1423	18S 510	0	0	0	0	0.00786403
1424	18S 511	0.000779423	0.000319693	0.00018875	0.000675676	0.00786403
1425	18S 512	0.00025974	0	0.000188715	0	0.00786403
1426	18S 513	0	0	0	0	0.00786403
1427	18S 514	0	0.000638978	0.000188679	0.000337724	0.00786403
1428	18S 515	0.000519211	0	0.000188644	0	0.00479193
1429	18S 516	0.000259538	0	0.000188608	0	0.00444444
1430	18S 517	0.000518807	0	0	0	0.00478951
1431	18S 518	0.00284532	0.000319387	0.000942507	0.00101215	0.00478951
1432	18S 519	0.000258598	0	0.000188466	0.000337268	0.00478951
1433	18S 520	0.0117557	0.000319285	0.00450281	0.00302623	0.00478951
1434	18S 521	0.00178571	0.000956938	0.00205954	0.000336134	0.00514958
1435	18S 522	0.000764721	0	0.000748363	0	0.00646284
1436	18S 523	0.000254842	0.000318979	0	0	0.00646284
1437	18S 524	0.000763942	0	0.000187091	0	0.00646284
1438	18S 525	0.00228717	0.000637755	0.000747943	0.000672721	0.00652963
1439	18S 526	0.000761808	0.000318776	0.000186951	0	0.00652963
1440	18S 527	0.000761421	0	0.000560538	0	0.00652963
1441	18S 528	0	0	0	0	0.00652963
1442	18S 529	0	0	0.000186986	0	0.00652963
1443	18S 530	0	0	0.000373832	0	0.00385264
1444	18S 531	0.000253936	0	0	0	0.00322893
1445	18S 532	0.000507614	0	0.000747105	0	0.00350542
1446	18S 533	0	0	0.000186741	0	0.00350542
1447	18S 534	0	0	0.000373343	0	0.00359885
1448	18S 535	0.000253743	0	0.000186637	0.0003367	0.00381194
1449	18S 536	0	0	0	0	0.00446694
1450	18S 537	0	0	0	0	0.00450315
1451	18S 538	0	0	0.00055991	0	0.00450315
1452	18S 539	0.000254259	0	0.000187336	0.000337838	0.00450315
1453	18S 540	0	0	0.000375375	0.000676819	0.00501672
1454	18S 541	0.0110943	0.00287632	0.0102211	0.0027027	0.00501672
1455	18S 542	0.117975	0.156005	0.142241	0.167607	0.00501672
1456	18S 543	0.0149418	0.0128034	0.012332	0.0166759	0.00577889
1457	18S 544	0.00814332	0.00345026	0.00583139	0.00709639	0.00786098
1458	18S 545	0.00389933	0.000606796	0.0039438	0.00405562	0.0100719
1459	18S 546	0.00290577	0	0.000292654	0.00149254	0.0100719
1460	18S 547	0.000832639	0.000829876	0.00146284	0.0022338	0.0101695
1461	18S 548	0.00125733	0.000837521	0.0011789	0	0.0101695
1462	18S 549	0.000837872	0.000838223	0	0.000750751	0.0101695
1463	18S 550	0.00041876	0.00250836	0.0011789	0.000750188	0.0101695
1464	18S 551	0.00167224	0.014827	0.00527705	0.00670641	0.0101695
1465	18S 552	0.000835422	0.000823045	0.000585995	0.0014881	0.0086145
1466	18S 553	0.000834725	0	0.00087822	0	0.0086145
1467	18S 554	0	0.00164339	0.000292654	0.000743494	0.00918033
1468	18S 555	0.00374376	0.000821693	0.000585138	0	0.00918033
1469	18S 556	0.00126796	0	0.00029967	0.000763942	0.00918033
1470	18S 557	0.000915751	0.000880282	0.000319285	0.000802568	0.00918033
1471	18S 558	0	0.000910747	0.000336361	0	0.00918033
1472	18S 559	0	0	0	0	0.0102564
1473	18S 560	0	0	0.000336361	0	0.0102564
1474	18S 561	0.000974184	0.000910747	0	0.00337268	0.0102564
1475	18S 562	0.000973236	0.00543478	0.00134363	0.00670017	0.0102564
1476	18S 563	0.00145773	0.00540541	0.00134183	0.0033389	0.0104089
1477	18S 564	0.000485673	0	0.000335345	0	0.0104089
1478	18S 565	0.000485437	0.00090009	0	0	0.0104089
1479	18S 566	0.000485201	0	0	0	0.0104089
1480	18S 567	0.00242014	0	0.000670241	0.000834028	0.0104089
1481	18S 568	0.000484027	0	0	0	0.0088349
1482	18S 569	0.000483793	0	0	0.00166528	0.00792507
1483	18S 570	0.00433735	0.002693	0.00400936	0.00166389	0.00886918
1484	18S 571	0.000962927	0.00446828	0	0.000831255	0.00886918
1485	18S 572	0.000962001	0	0	0	0.00886918
1486	18S 573	0	0	0.000334001	0	0.00886918
1487	18S 574	0.000481464	0	0.000334448	0.000830565	0.00886918
1488	18S 575	0.000481696	0	0.00033456	0	0.00744048
1489	18S 576	0.00765184	0.0201401	0.0063228	0.0139344	0.00744048
1490	18S 577	0.000487329	0.00265487	0.00134318	0.000829876	0.008
1491	18S 578	0.0020284	0	0.00175377	0	0.008
1492	18S 579	0.00807673	0.0200547	0.00973913	0.0164931	0.00996885
1493	18S 580	0.00657534	0.00197628	0.00532927	0.00184502	0.0108382
1494	18S 581	0.0059312	0.00206398	0.00330033	0.00194742	0.0108382
1495	18S 582	0.00754243	0	0.00394564	0	0.0134529
1496	18S 583	0.000630517	0	0	0.00100705	0.0178019
1497	18S 584	0.00314465	0	0	0	0.0178019
1498	18S 585	0.0136561	0.00107759	0.00526085	0.00301205	0.0178019
1499	18S 586	0.00185874	0	0.00131349	0	0.0178019
1500	18S 587	0	0	0	0	0.0178019
1501	18S 588	0	0	0.000437637	0	0.0163812
1502	18S 589	0.000619195	0	0	0.00100301	0.0121581
1503	18S 590	0.00798526	0.00215054	0	0.002002	0.0121581
1504	18S 591	0.0175015	0.00534759	0.00824653	0.00498008	0.0121581
1505	18S 592	0.00362538	0	0.00303424	0.000998004	0.0124269
1506	18S 593	0.002414	0.00320513	0.000867679	0	0.0124269
1507	18S 594	0.00659472	0	0.00560828	0.00397614	0.0125833
1508	18S 595	0	0.00106724	0.00215332	0	0.0125833
1509	18S 596	0.00119832	0	0.000430663	0.000993049	0.0125833
1510	18S 597	0.00298686	0	0.00129032	0	0.0125833
1511	18S 598	0.00119904	0.0042508	0.00172191	0	0.0142959
1512	18S 599	0.048627	0.00951374	0.0334308	0.0328185	0.0142959
1513	18S 600	0.012987	0.00316122	0.0119736	0.00384615	0.0143052
1514	18S 601	0.0411478	0.0226571	0.0346752	0.037037	0.0151099
1515	18S 602	0.015983	0.0132114	0.0183881	0.0100825	0.016075
1516	18S 603	0.0100211	0	0.00622084	0.00182983	0.023427
1517	18S 604	0.00992167	0.00706357	0.0111538	0.00364631	0.023427
1518	18S 605	0.0128866	0.00999001	0.00914983	0.00813743	0.023427
1519	18S 606	0.00410678	0.000998004	0.00455408	0.000904159	0.023427
1520	18S 607	0.00204918	0.000997009	0.00113723	0.000903342	0.0239948
1521	18S 608	0.00153453	0.000996016	0.0026465	0.000902527	0.0239948
1522	18S 609	0	0	0.00113293	0	0.0239948
1523	18S 610	0.000511247	0.000995025	0.0015083	0.00270027	0.0290974
1524	18S 611	0.00204082	0.0019861	0.00300752	0.00358744	0.0508274
1525	18S 612	0.000509944	0.00198216	0.000375799	0.000896057	0.0508274
1526	18S 613	0.00203562	0.00197824	0.000375657	0	0.0508274
1527	18S 614	0	0.000988142	0.0011257	0.000895255	0.0508274
1528	18S 615	0.0277091	0.00197239	0.0104012	0.00975177	0.0508274
1529	18S 616	0.00541339	0.0019685	0.00259451	0.00176991	0.0479911
1530	18S 617	0.0078125	0.0107108	0.00626151	0.00877193	0.0360679
1531	18S 618	0.0101498	0.0162835	0.0123681	0.0172414	0.0238095
1532	18S 619	0.115056	0.238512	0.168533	0.221625	0.0238095
1533	18S 620	0.313363	0.562958	0.356378	0.546037	0.0238095
1534	18S 621	0.0221137	0.0424298	0.0261711	0.0392501	0.0216734
1535	18S 622	0.00571102	0.00576806	0.00659631	0.00871333	0.0164745
1536	18S 623	0.00342564	0.00242792	0.00357681	0.00145349	0.0183173
1537	18S 624	0.000570613	0.00151515	0.000188218	0	0.0219445
1538	18S 625	0.000285225	0.000605693	0.000376294	0.000871333	0.0219445
1539	18S 626	0.0011396	0.000302755	0.00093985	0.00202899	0.0219445
1540	18S 627	0.000853971	0.000605144	0.00187617	0.00086881	0.0219445
1541	18S 628	0.00056899	0.000906892	0.00112444	0.00144592	0.0219445
1542	18S 629	0.00142045	0	0.00131013	0.000289101	0.0170608
1543	18S 630	0.00649167	0.000906071	0.000934929	0.00201962	0.0164375
1544	18S 631	0.000564175	0.000301932	0.000186951	0.000288434	0.0155837
1545	18S 632	0.000845547	0.000301841	0.000933881	0	0.00988659
1546	18S 633	0.00056338	0.00030175	0.00056012	0.000864553	0.00898551
1547	18S 634	0.000563063	0.000603136	0.000932662	0.000288101	0.00898551
1548	18S 635	0	0.000602773	0.000559284	0.000288018	0.00807382
1549	18S 636	0.00112581	0.00120409	0.00279018	0.000287936	0.00804136
1550	18S 637	0.00140528	0.000300933	0.000743494	0.000287853	0.00804136
1551	18S 638	0.00140331	0.00120228	0.000371609	0	0.00821297
1552	18S 639	0	0	0	0.00028777	0.00821297
1553	18S 640	0.000280584	0	0	0.000287687	0.00821297
1554	18S 641	0.000560853	0.00180018	0.00148423	0.00172315	0.00821297
1555	18S 642	0.000280348	0.000899281	0.00148203	0.000287109	0.00821297
1556	18S 643	0	0	0.000185219	0	0.0103179
1557	18S 644	0	0	0	0	0.0103179
1558	18S 645	0	0	0	0	0.0110572
1559	18S 646	0	0	0.000185185	0.000573888	0.0170732
1560	18S 647	0.000840336	0.000599161	0.000740192	0.000860092	0.0170732
1561	18S 648	0.00055991	0	0.000739645	0	0.0208877
1562	18S 649	0	0	0	0	0.0208877
1563	18S 650	0.000279955	0.000598982	0.000369686	0.000286944	0.0208877
1564	18S 651	0	0.000598623	0.000369686	0.000573559	0.0208877
1565	18S 652	0.000280112	0.000299222	0	0	0.0208877
1566	18S 653	0.000280034	0	0.000369686	0	0.0166061
1567	18S 654	0.000280034	0.000598086	0.000369549	0.000286779	0.0111892
1568	18S 655	0.0181468	0.0207906	0.0202752	0.019955	0.00818414
1569	18S 656	0.00164699	0.00175387	0.00108499	0.000561798	0.00782236
1570	18S 657	0.000274424	0.000584283	0.000180799	0.00140252	0.0074664
1571	18S 658	0	0.000292056	0.000361468	0	0.00737826
1572	18S 659	0.000274348	0.000583771	0.000361337	0.000280426	0.0073928
1573	18S 660	0.0076232	0.00839363	0.0044964	0.00889383	0.00921315
1574	18S 661	0.0105065	0.0105956	0.00944237	0.0174768	0.0142134
1575	18S 662	0.014862	0.050571	0.0171599	0.0512953	0.0142134
1576	18S 663	0.0146444	0.0300633	0.0131329	0.0311245	0.0189081
1577	18S 664	0.010608	0.0219242	0.0111073	0.0109235	0.0223863
1578	18S 665	0.00872018	0.00640697	0.00998139	0.00665845	0.0223863
1579	18S 666	0.00687723	0.00357508	0.00454699	0.00344065	0.0223863
1580	18S 667	0.00405885	0.00381582	0.00419252	0.00391677	0.0223863
1581	18S 668	0.00151976	0.00101652	0.000670354	0.00195456	0.0223863
1582	18S 669	0.000759301	0.000508001	0.000502513	0.00122011	0.0208711
1583	18S 670	0.000505945	0.000761421	0.000167476	0.000731529	0.0205771
1584	18S 671	0.000758342	0.000760842	0.00033484	0.000243784	0.0138486
1585	18S 672	0.000252717	0.000506971	0.0008364	0.000730816	0.0101166
1586	18S 673	0.00277218	0.00202378	0.00100267	0.00436575	0.00808213
1587	18S 674	0.000251953	0.000252908	0.00100167	0.000727096	0.00725275
1588	18S 675	0.0010068	0	0.000166917	0	0.00725275
1589	18S 676	0.000754527	0.00176723	0.0024975	0.00193517	0.00664158
1590	18S 677	0	0.000252398	0.000166472	0.000241838	0.00709677
1591	18S 678	0.00400802	0.00452261	0.00265648	0.00144893	0.00709677
1592	18S 679	0.00523299	0.0062422	0.00446281	0.00336943	0.00709677
1593	18S 680	0.00619118	0.0029873	0.00411523	0.00621861	0.00709677
1594	18S 681	0.0146413	0.00396727	0.00751511	0.00476077	0.00709677
1595	18S 682	0.000975134	0.000495663	0.00146819	0.00142619	0.00665951
1596	18S 683	0	0.00024777	0	0	0.00665951
1597	18S 684	0.0075006	0.00296443	0.00195376	0.00426036	0.00665951
1598	18S 685	0.00313555	0.00148002	0.00065083	0.0014181	0.00665951
1599	18S 686	0.000963855	0.000739463	0.000487884	0	0.00560398
1600	18S 687	0.000962927	0.00172244	0.00129933	0.00235793	0.00622019
1601	18S 688	0.00144231	0.000491884	0.0017834	0.00164783	0.00633947
1602	18S 689	0.000480538	0.000737282	0.00145702	0.00141044	0.00717213
1603	18S 690	0.00904762	0.0150085	0.00771084	0.0164162	0.00717213
1604	18S 691	0.0691489	0.0803651	0.0696458	0.0825201	0.00717213
1605	18S 692	0.0588481	0.0479017	0.0425014	0.0486377	0.00717213
1606	18S 693	0.0194393	0.013796	0.0129943	0.0156933	0.00717213
1607	18S 694	0.00244948	0.00250209	0.00239538	0.00257579	0.00633688
1608	18S 695	0.00163066	0.00125	0.0021097	0.000792393	0.00660264
1609	18S 696	0.000203791	0	0.000281254	0	0.00660264
1610	18S 697	0.00243952	0.000416493	0.000843052	0.00118718	0.00714427
1611	18S 698	0.00121827	0.00104015	0.00154321	0.000790826	0.00787092
1612	18S 699	0.00202634	0.000415887	0.00196024	0.000987557	0.00787092
1613	18S 700	0	0	0.000279955	0	0.00787092
1614	18S 701	0.000607533	0.000623441	0.00111857	0.000592183	0.00787092
1615	18S 702	0.00603865	0.00557967	0.00569999	0.00666667	0.00787092
1616	18S 703	0.000402414	0.00165051	0.00138831	0.000979432	0.00706991
1617	18S 704	0	0	0	0.000195848	0.00706991
1618	18S 705	0.000402253	0	0.000138812	0.000391543	0.00605232
1619	18S 706	0.000603015	0.000412456	0.000138793	0.000195733	0.00605232
1620	18S 707	0.000602652	0.000824232	0.00180105	0.00117302	0.00597418
1621	18S 708	0.000401606	0.000206016	0	0.000781403	0.00597418
1622	18S 709	0.000200763	0.000617665	0	0.000390549	0.00597418
1623	18S 710	0.000401365	0.000205846	0.000692233	0.000195236	0.00597418
1624	18S 711	0.000802085	0.000822707	0.000691754	0.000195198	0.00614203
1625	18S 712	0.00140168	0.00123254	0.00124361	0.000780183	0.00614203
1626	18S 713	0.00060036	0	0.000966317	0.000779575	0.00614203
1627	18S 714	0.00119928	0.000205381	0.00068975	0.000194856	0.00614203
1628	18S 715	0.000798882	0.00102585	0.000827016	0.000194818	0.00614203
1629	18S 716	0	0.000205128	0.000137817	0.00019478	0.0057185
1630	18S 717	0.000199681	0.000205086	0	0.000778513	0.0057185
1631	18S 718	0.00258913	0	0.000963789	0.000972195	0.00609306
1632	18S 719	0.00198768	0.000205044	0.000137665	0	0.00609306
1633	18S 720	0.000595948	0.00102417	0.000412825	0.000194401	0.00799554
1634	18S 721	0.00019861	0.000204792	0.000137589	0.000582864	0.0146394
1635	18S 722	0.00356224	0.00306247	0.00123677	0.00193911	0.0146394
1636	18S 723	0.000197863	0.000408163	0.000549375	0.000775044	0.0146394
1637	18S 724	0.00039557	0.00020404	0.000686248	0.000193723	0.0146394
1638	18S 725	0.00315457	0.00122274	0.0030104	0.00193349	0.0146394
1639	18S 726	0.000788022	0.000407415	0.000273598	0.000193311	0.00974202
1640	18S 727	0.00118064	0.000407249	0.000273523	0.000193274	0.00874688
1641	18S 728	0.000196734	0	0.000136743	0	0.00674237
1642	18S 729	0.0015714	0.00162635	0.00327109	0.000965437	0.00674237
1643	18S 730	0.000981162	0.000406421	0.000408719	0	0.00714869
1644	18S 731	0	0	0	0.00019305	0.00714869
1645	18S 732	0.000392311	0.000203169	0.000272405	0	0.00888585
1646	18S 733	0.00058812	0	0.000408441	0.000193013	0.0102484
1647	18S 734	0.000587774	0	0.000136129	0.000192976	0.0108585
1648	18S 735	0	0	0.000408219	0.000192938	0.0108585
1649	18S 736	0.000391696	0	0.000136054	0.000192901	0.0108585
1650	18S 737	0.00429017	0.00303828	0.00162999	0.0017331	0.0108585
1651	18S 738	0.00116868	0.000809553	0.00162734	0.00134615	0.0108585
1652	18S 739	0.000583998	0.000606796	0.000542152	0.00057659	0.00980196
1653	18S 740	0.00445736	0.000404531	0.00202895	0.00153521	0.0113863
1654	18S 741	0.00462963	0.00181708	0.00524758	0.00191534	0.0113863
1655	18S 742	0.00537222	0.00221595	0.00535332	0.00133894	0.0113863
1656	18S 743	0.0032511	0.00140817	0.00373333	0.00248044	0.0113863
1657	18S 744	0.00209924	0.00120555	0.00252693	0.00171429	0.0113863
1658	18S 745	0.000953289	0.000401687	0.0011957	0.000571102	0.0105531
1659	18S 746	0.0183418	0.00717846	0.00843104	0.0164763	0.0105531
1660	18S 747	0.0022409	0	0.000395049	0.000561377	0.00878018
1661	18S 748	0.00335008	0.00119498	0.00315043	0.00205416	0.00878018
1662	18S 749	0.00278396	0.00198768	0.00261849	0.00186393	0.0134758
1663	18S 750	0.00259163	0.00138944	0.0023511	0.00148893	0.0167131
1664	18S 751	0.0062546	0.00237624	0.00493891	0.00259885	0.0167131
1665	18S 752	0.00512445	0.0053181	0.00684136	0.00663839	0.0167131
1666	18S 753	0.0054605	0.00274995	0.00424165	0.00165685	0.0167131
1667	18S 754	0.00308474	0.00137309	0.00294758	0.00311984	0.0167131
1668	18S 755	0.00361598	0.00195771	0.00471939	0.00256269	0.0140909
1669	18S 756	0.00396254	0.00234375	0.00595917	0.00292024	0.0111429
1670	18S 757	0.00590868	0.00272692	0.00604915	0.00163994	0.00888757
1671	18S 758	0.00143036	0.00174995	0.00251414	0.0010921	0.00888757
1672	18S 759	0.000357462	0.000388727	0.000502576	0.000545752	0.00771133
1673	18S 760	0.00498132	0.000972006	0.00300714	0.00562307	0.00771133
1674	18S 761	0.000355682	0.000388651	0.000501002	0.000362647	0.00855798
1675	18S 762	0.000710858	0	0.000626017	0.000362516	0.00855798
1676	18S 763	0.00053286	0	0.000375469	0	0.00855798
1677	18S 764	0.000177588	0	0.00025025	0	0.00855798
1678	18S 765	0.000532481	0.0003885	0.000750188	0	0.00855798
1679	18S 766	0.00424178	0.00116414	0.00236996	0.00162866	0.00814901
1680	18S 767	0.00404858	0.00154979	0.00533499	0.00342651	0.00807912
1681	18S 768	0.00490454	0.00154739	0.000867733	0.00162045	0.00797426
1682	18S 769	0.0259341	0.0067243	0.00896806	0.0164689	0.0101333
1683	18S 770	0.00577348	0.00383068	0.00598656	0.00598802	0.0112932
1684	18S 771	0.00135662	0.000574273	0.00109836	0.000703977	0.0112932
1685	18S 772	0	0.000574053	0.000122115	0.000175963	0.012218
1686	18S 773	0.000678656	0.000191314	0.00024417	0.000175932	0.0132339
1687	18S 774	0.028008	0.00824545	0.00843315	0.0134592	0.0132339
1688	18S 775	0.00363276	0.00191388	0.00280317	0.00209314	0.0132339
1689	18S 776	0.00115473	0	0.00133901	0.00104548	0.0132339
1690	18S 777	0.00116009	0	0.000367017	0.000349895	0.0132339
1691	18S 778	0.00363276	0.000770416	0.00183173	0.000349773	0.0103378
1692	18S 779	0.00181309	0.000192604	0.00134195	0.000524476	0.00738825
1693	18S 780	0.0179903	0.00517638	0.0101572	0.0121003	0.00819448
1694	18S 781	0.00671719	0.00380304	0.00632748	0.00449883	0.00819448
1695	18S 782	0.00475494	0.000847458	0.00248276	0.001325	0.00819448
1696	18S 783	0.000731395	0.00148085	0.000964719	0.00037843	0.00819448
1697	18S 784	0.000548948	0.000211506	0.000689655	0.000189286	0.00819448
1698	18S 785	0.00200877	0.000845309	0.00247763	0.000567537	0.00785714
1699	18S 786	0.000729927	0.000211282	0.000687853	0	0.00815523
1700	18S 787	0.000547146	0.00126609	0.000962199	0.000756144	0.00815523
1701	18S 788	0.00290962	0.00189553	0.00369762	0.0022633	0.00821956
1702	18S 789	0.00775893	0.00461216	0.010435	0.00394514	0.00821956
1703	18S 790	0.00162133	0.00104712	0.0014885	0.00131332	0.00824063
1704	18S 791	0.0286964	0.00851329	0.0165025	0.0216593	0.00880872
1705	18S 792	0.00522193	0.00392968	0.00805281	0.00329308	0.00880872
1706	18S 793	0.0266012	0.00820513	0.0143155	0.0177898	0.00880872
1707	18S 794	0.00639731	0.00184275	0.00504985	0.00268817	0.00880872
1708	18S 795	0.0035229	0.00183936	0.00335527	0.00232475	0.00880872
1709	18S 796	0.0250245	0.0184591	0.025283	0.025784	0.00726824
1710	18S 797	0.0642792	0.0656168	0.0804997	0.0659072	0.00726824
1711	18S 798	0.00623574	0.00540742	0.0072339	0.00775069	0.00726824
1712	18S 799	0.0923523	0.0275612	0.029746	0.0396961	0.00696584
1713	18S 800	0.00848618	0.0025321	0.00244499	0.00262914	0.00696584
1714	18S 801	0.00341018	0.00234572	0.0045359	0.00339088	0.00696584
1715	18S 802	0.00177039	0.000721241	0.00143615	0.00092393	0.00649265
1716	18S 803	0.00135999	0.00036049	0.00165435	0.000307882	0.006067
1717	18S 804	0.00581395	0.000720461	0.00406415	0.00138355	0.00593354
1718	18S 805	0.00310015	0.000899766	0.00262927	0.00122831	0.00523423
1719	18S 806	0.0101428	0.00215479	0.00512317	0.00731707	0.0049325
1720	18S 807	0.00715706	0.00286533	0.00810898	0.00137028	0.0049325
1721	18S 808	0.00172003	0.000894614	0.00226537	0.000760688	0.00465899
1722	18S 809	0.00487163	0.00160772	0.00226025	0.00257967	0.00465899
1723	18S 810	0.00157749	0.000178603	0.000860308	0.000455028	0.00423947
1724	18S 811	0.00144395	0.000713903	0.00139605	0.00030326	0.00423947
1725	18S 812	0.00353172	0.00106971	0.00278432	0.000454683	0.00510465
1726	18S 813	0.000522944	0.000356443	0.000855981	0	0.00510465
1727	18S 814	0.00234772	0.00106819	0.00160239	0.00211736	0.00510465
1728	18S 815	0.00143266	0.000711617	0.00149333	0.000604595	0.00510465
1729	18S 816	0.000390574	0.000177873	0.000319898	0.000151126	0.00510465
1730	18S 817	0.000780539	0.000710985	0.000958773	0.000905934	0.00465584
1731	18S 818	0.00077993	0.000355366	0.00138298	0.000603591	0.00465584
1732	18S 819	0.0020755	0.00035524	0.00180525	0.000301705	0.00429022
1733	18S 820	0.0015542	0.000709975	0.00180199	0.00120536	0.00435974
1734	18S 821	0.000776498	0.000177462	0.000635593	0.00030125	0.00435974
1735	18S 822	0.000258766	0.000177431	0.000740976	0.000150602	0.00435974
1736	18S 823	0.00155019	0.00230129	0.0016908	0.002104	0.00435974
1737	18S 824	0.00129016	0.00035392	0.00126649	0.00165041	0.00435974
1738	18S 825	0.0019315	0.00106063	0.0010543	0.00179721	0.00432472
1739	18S 826	0.00128601	0.000706589	0.00189414	0.00224148	0.00439024
1740	18S 827	0.000642591	0.00035317	0.000630981	0.000597372	0.00531059
1741	18S 828	0.00230799	0.00211454	0.00324948	0.00549532	0.00531059
1742	18S 829	0.0157749	0.017316	0.0157846	0.0275852	0.00531059
1743	18S 830	0.00176367	0.00241838	0.00195634	0.00431406	0.00531059
1744	18S 831	0.00201157	0.00138002	0.00277236	0.00329655	0.00531059
1745	18S 832	0.00338303	0.00617178	0.00500613	0.00937101	0.00482393
1746	18S 833	0.000876314	0.000685284	0.00102062	0.000851185	0.00460941
1747	18S 834	0.000625547	0.000171292	0.00040808	0.000283648	0.00460941
1748	18S 835	0.000125094	0.000342466	0.000815494	0.000141804	0.00455188
1749	18S 836	0.000125078	0.000855432	0.000509424	0.000850099	0.00455188
1750	18S 837	0.00124922	0.00238949	0.00172905	0.00212074	0.00455188
1751	18S 838	0.000374625	0.000170648	0.00060988	0.000282686	0.00455188
1752	18S 839	0.000998004	0.00136333	0.00121827	0.00211566	0.00455188
1753	18S 840	0.0011215	0.000851354	0.00121679	0.00126778	0.00470256
1754	18S 841	0.000622665	0.000680619	0.00121531	0.00028165	0.00793275
1755	18S 842	0	0	0	0.000281571	0.0182835
1756	18S 843	0.00111954	0.000340194	0.000101266	0.000422178	0.0182835
1757	18S 844	0.00297656	0.000679925	0.00131472	0.00294654	0.0294676
1758	18S 845	0.0012387	0.000849185	0.00101031	0.000981217	0.0294676
1759	18S 846	0.000495233	0	0.000303	0.000280269	0.0294676
1760	18S 847	0.00123655	0.000339559	0.000605632	0.000420227	0.0294676
1761	18S 848	0.00123503	0.000509079	0.000706072	0.000559989	0.0294676
1762	18S 849	0.0012335	0.000339271	0.000705574	0.000279916	0.0250654
1763	18S 850	0.0433089	0.00640485	0.0164568	0.0173291	0.0139378
1764	18S 851	0.00645616	0.0038662	0.00572557	0.00601751	0.0133504
1765	18S 852	0.00117247	0.000168067	0.00059195	0.00068334	0.0133504
1766	18S 853	0.00152189	0.000839631	0.0017727	0.0019097	0.0133504
1767	18S 854	0.00802046	0.0020114	0.00402474	0.00244965	0.0141246
1768	18S 855	0.0197173	0.00500584	0.0084688	0.0179096	0.0194681
1769	18S 856	0.00476407	0.00116667	0.00397518	0.0024	0.0194681
1770	18S 857	0.00135977	0.000333278	0.00135554	0.00106553	0.0240319
1771	18S 858	0.00113212	0.000999001	0.00106414	0.000798616	0.0240319
1772	18S 859	0.00270972	0.000665557	0.00375867	0.00132926	0.0240319
1773	18S 860	0.000902425	0.000332668	0.00105902	0.000664187	0.0240319
1774	18S 861	0.00202634	0.000332557	0.00144203	0.00119411	0.0240319
1775	18S 862	0.00504032	0.000996678	0.00316243	0.00211836	0.0189018
1776	18S 863	0.00156565	0.000995685	0.0026761	0.000925926	0.018013
1777	18S 864	0.00078221	0.000331785	0.000477646	0.000264515	0.0140325
1778	18S 865	0.00267469	0	0.00114504	0.00197994	0.00874126
1779	18S 866	0.00166889	0.000994365	0.00171461	0.00171301	0.00607324
1780	18S 867	0.000779163	0	0.00104742	0.000395205	0.00607324
1781	18S 868	0.000111297	0.000165837	0	0	0.00450212
1782	18S 869	0.00222767	0.000166334	0.00152599	0.000660589	0.00491172
1783	18S 870	0.000335833	0.00016835	0.000192437	0.000398883	0.00491172
1784	18S 871	0.00358704	0.000676934	0.00241359	0.00252861	0.00598723
1785	18S 872	0.00078749	0.000510204	0.000583317	0.000133708	0.00598723
1786	18S 873	0.000456621	0.000343171	0.0013804	0.000941873	0.00598723
1787	18S 874	0	0.000343584	0	0.000269505	0.00598723
1788	18S 875	0.00130502	0.000360946	0.000516209	0.000700967	0.00598723
1789	18S 876	0.000604668	0	0.000947967	0.000996725	0.00530152
1790	18S 877	0.00233014	0.00132425	0.00160703	0.00259815	0.00672175
1791	18S 878	0.00245399	0.000567967	0.00203688	0.00144342	0.00672175
1792	18S 879	0.0030453	0.00138944	0.00277593	0.00224652	0.00840584
1793	18S 880	0.00140503	0.00100361	0.00201252	0.00105485	0.00840584
1794	18S 881	0.0300494	0.00553506	0.0139377	0.0112411	0.00840584
1795	18S 882	0.0049007	0.00146905	0.00335804	0.00232234	0.00840584
1796	18S 883	0.00108426	0.000612933	0.000866051	0.00138586	0.0155303
1797	18S 884	0.0578015	0.0167095	0.0214577	0.0253135	0.0155303
1798	18S 885	0.0042735	0.00136737	0.00426954	0.0021978	0.0155303
1799	18S 886	0.00160514	0.000456621	0.00148727	0.00146341	0.0155303
1800	18S 887	0.0156387	0.00770276	0.0106676	0.00990099	0.0155303
1801	18S 888	0.00385154	0.00135747	0.00330033	0.00336943	0.0108434
1802	18S 889	0.00383676	0.00135563	0.00310729	0.00240096	0.00925553
1803	18S 890	0.00641137	0.00405041	0.00418639	0.0026341	0.00925553
1804	18S 891	0.0277965	0.00358744	0.0125809	0.00972255	0.00876843
1805	18S 892	0.00385971	0.000896057	0.00215208	0.00189349	0.00827729
1806	18S 893	0.00234388	0.000895255	0.00375201	0.00236128	0.00827729
1807	18S 894	0.00117057	0.00178731	0.000535714	0.000943619	0.00927715
1808	18S 895	0.000167196	0.000892857	0.000713776	0.000707214	0.00931315
1809	18S 896	0.001169	0.00311526	0.00195904	0.000706714	0.00931315
1810	18S 897	0.001001	0	0.000356062	0.000706215	0.00931315
1811	18S 898	0.0210681	0.00443066	0.00969676	0.00817184	0.00931315
1812	18S 899	0.00146771	0.000885347	0.00123261	0.00209692	0.0100297
1813	18S 900	0.00179066	0.000442674	0.00123109	0.000465766	0.0100297
1814	18S 901	0.00243586	0.00220848	0.00315568	0.00116306	0.0100297
1815	18S 902	0.000973394	0	0.00052567	0.000465008	0.0100297
1816	18S 903	0.00145796	0.00176367	0.0015748	0.000929152	0.0100297
1817	18S 904	0.00291168	0.0030837	0.0060965	0.00485999	0.00855973
1818	18S 905	0.0157694	0.00569925	0.0108602	0.0052971	0.00848708
1819	18S 906	0.00809192	0.00273224	0.00790722	0.00282952	0.00692925
1820	18S 907	0.0187421	0.00227169	0.0170984	0.00469373	0.00674157
1821	18S 908	0.00695322	0.00181488	0.00619195	0.00467399	0.00684932
1822	18S 909	0.00267928	0.00181159	0.00632371	0.00116713	0.00684932
1823	18S 910	0.000787402	0	0.00136589	0.000233372	0.00743771
1824	18S 911	0.00125826	0.000452694	0.00153427	0.000699627	0.00827068
1825	18S 912	0.000314465	0	0.000681431	0.000699138	0.00827068
1826	18S 913	0.00156986	0.00225836	0.00373388	0.000931315	0.00827068
1827	18S 914	0.000941029	0.000451467	0.000847889	0.000232775	0.00827068
1828	18S 915	0.00406123	0.00270149	0.00253721	0.0013947	0.00827068
1829	18S 916	0.00388984	0.00581916	0.00370745	0.00439713	0.00778643
1830	18S 917	0.00155352	0.00134108	0.00319167	0.00230894	0.00778643
1831	18S 918	0.00124127	0	0.00134206	0.000692201	0.00778643
1832	18S 919	0.00693481	0.00178492	0.00583722	0.0116306	0.00778643
1833	18S 920	0.00429646	0.00222618	0.00497843	0.00408812	0.00637755
1834	18S 921	0.00107296	0	0.00082905	0.000907647	0.00686913
1835	18S 922	0.000459629	0.000445038	0.0006628	0.000680272	0.00729395
1836	18S 923	0.00168247	0	0.00247934	0.000226706	0.00729395
1837	18S 924	0.00091687	0.00044484	0.00181488	0.00113225	0.00729395
1838	18S 925	0.001221	0.00221926	0.00230453	0.000452694	0.00729395
1839	18S 926	0.00106724	0.00177226	0.00311782	0.0018075	0.00729395
1840	18S 927	0.000913938	0	0.000983607	0.000225887	0.00822604
1841	18S 928	0.00227964	0.00132743	0.00180003	0.000902731	0.00835126
1842	18S 929	0.00514061	0.00484581	0.004561	0.00471698	0.00835126
1843	18S 930	0.0188399	0.011324	0.0359611	0.000897666	0.00835126
1844	18S 931	0.00236791	0.00043535	0.005	0.000672797	0.00835126
1845	18S 932	0.00295116	0.00217202	0.00420103	0.00112007	0.00835126
1846	18S 933	0.028944	0.0149765	0.0301796	0.0251147	0.0081957
1847	18S 934	0.00271506	0.00341151	0.00285886	0.00239651	0.0081957
1848	18S 935	0.00228115	0.00170285	0.00195225	0.00173989	0.0081957
1849	18S 936	0.00185001	0.00127551	0.00284559	0.00346771	0.00766581
1850	18S 937	0.000853121	0.000424989	0.0013461	0.0012987	0.00786608
1851	18S 938	0.000426379	0.00127334	0.000896593	0.000432713	0.00786608
1852	18S 939	0.00170261	0.00169492	0.00253391	0.00151221	0.00786608
1853	18S 940	0.00452105	0.00253593	0.00739973	0.00856715	0.00786608
1854	18S 941	0.00365991	0.000422476	0.00442022	0.00106975	0.00786608
1855	18S 942	0.00168634	0	0.00176497	0.00149541	0.00712871
1856	18S 943	0.0016835	0.000422297	0.00117526	0.000853789	0.00673437
1857	18S 944	0.0919745	0.027127	0.051157	0.0654299	0.00673437
1858	18S 945	0.00871542	0.00531915	0.00829646	0.00771972	0.00673437
1859	18S 946	0.00239415	0.00366898	0.00262069	0.0017783	0.00673437
1860	18S 947	0.00188656	0.00244002	0.00178989	0.00019755	0.00624868
1861	18S 948	0.000754053	0.00162404	0.000825423	0.000789578	0.00628931
1862	18S 949	0.000251288	0.000811359	0.000412541	0.000591833	0.00628931
1863	18S 950	0.000251225	0.00202429	0.000274952	0.000197239	0.00744337
1864	18S 951	0.00871622	0.0044337	0.00356164	0.00743931	0.00885536
1865	18S 952	0.00260805	0.00160966	0.0032769	0.00117325	0.00885536
1866	18S 953	0.00124039	0.000804182	0.0025875	0.00156189	0.00885536
1867	18S 954	0.000248016	0	0.000272294	0.000975229	0.00885536
1868	18S 955	0.00272075	0.00200642	0.00203804	0.00233508	0.00885536
1869	18S 956	0.00135853	0.000801925	0.00149233	0.000583431	0.00825628
1870	18S 957	0.00271203	0.00080289	0.00257348	0.00329905	0.00825628
1871	18S 958	0.00295858	0.00201288	0.00243836	0.00213675	0.00709449
1872	18S 959	0.00197385	0.00363783	0.00338616	0.00388576	0.00709449
1873	18S 960	0.000616447	0	0.00175771	0.000776548	0.00709449
1874	18S 961	0.00319528	0	0.00310015	0.00251743	0.00709449
1875	18S 962	0.00073692	0.0016142	0.000808081	0.000773994	0.00591279
1876	18S 963	0.0556715	0.0244094	0.0345859	0.0468462	0.00591279
1877	18S 964	0.00679645	0.00235664	0.00555987	0.0044069	0.00591279
1878	18S 965	0.0020692	0.00156863	0.000387747	0.0012837	0.0063674
1879	18S 966	0.00650982	0.00195695	0.00411893	0.00510856	0.0063674
1880	18S 967	0.00398134	0.00389864	0.00499488	0.00291068	0.0063674
1881	18S 968	0.00249631	0.00077912	0.00319163	0.00181587	0.0063674
1882	18S 969	0.00135977	0.0027195	0.000765404	0.00108834	0.00727141
1883	18S 970	0.0246463	0.00656117	0.0133417	0.0105887	0.013424
1884	18S 971	0.0026455	0	0.00226074	0.00179179	0.015873
1885	18S 972	0.00165071	0.00192604	0.00137966	0.00107392	0.015873
1886	18S 973	0.00329056	0.00421941	0.00412191	0.0046321	0.015873
1887	18S 974	0.0997334	0.105353	0.142184	0.156194	0.015873
1888	18S 975	0.109949	0.312249	0.166548	0.349756	0.015873
1889	18S 976	0.00948899	0.025753	0.0154739	0.0294118	0.0109194
1890	18S 977	0.00277802	0.00843786	0.00376631	0.00490937	0.00957891
1891	18S 978	0.00182023	0.00386539	0.00392739	0.00479459	0.00957891
1892	18S 979	0.0035412	0.00475221	0.00443131	0.00262541	0.00918474
1893	18S 980	0.00060423	0.000678426	0.000954861	0.00112391	0.0116818
1894	18S 981	0.00215554	0.00293454	0.00242782	0.00159027	0.016498
1895	18S 982	0.000947541	0.000676895	0.00181755	0.000747873	0.0203073
1896	18S 983	0.0125882	0.00850112	0.0077293	0.0109108	0.024028
1897	18S 984	0.00187027	0.00201794	0.00188939	0.00184928	0.024028
1898	18S 985	0.000340686	0.000449236	0.00025822	0.000370199	0.024028
1899	18S 986	0.000512601	0.00112638	0.000431481	0.000555607	0.024028
1900	18S 987	0.000427204	0.000225428	0.00103466	0.000277778	0.024028
1901	18S 988	0.00501573	0.00314819	0.0058314	0.00286268	0.0185777
1902	18S 989	0.00314198	0.00515579	0.00580403	0.00349972	0.0114444
1903	18S 990	0.000679002	0.000224165	0.000511858	0.00046032	0.0103348
1904	18S 991	0.00042434	0.00112007	0.000597117	0.000919963	0.00965611
1905	18S 992	0.00161386	0.00335495	0.00213129	0.000919879	0.0084279
1906	18S 993	0.00252738	0.00479616	0.00412312	0.0010005	0.00865446
1907	18S 994	0.000948947	0.00135943	0.000488043	0.001412	0.0087172
1908	18S 995	0.00380844	0.00465753	0.00596111	0.000607718	0.00936467
1909	18S 996	0.000572902	0.00165654	0.000982222	0.00121902	0.00936467
1910	18S 997	0.0028566	0.00929978	0.00371929	0.0073611	0.00936467
1911	18S 998	0.00190078	0.00408719	0.00321951	0.00191224	0.00936467
1912	18S 999	0.00180351	0.00109022	0.0016566	0.00110597	0.00936467
1913	18S 1000	0.00151688	0.00163399	0.00136253	0.00100452	0.00900419
1914	18S 1001	0.0122682	0.0121065	0.00647906	0.0113219	0.0126582
1915	18S 1002	0.00317401	0.00107498	0.00193032	0.0027731	0.0126582
1916	18S 1003	0.00906652	0.0189823	0.012768	0.00404419	0.0152882
1917	18S 1004	0.00368698	0.00654793	0.00455278	0.00255805	0.0152882
1918	18S 1005	0.0135479	0.00882658	0.00753083	0.0134912	0.0156798
1919	18S 1006	0.00199637	0.00258933	0.00187917	0.00116335	0.0156798
1920	18S 1007	0.00316599	0.00438257	0.00290425	0.00376666	0.0156798
1921	18S 1008	0.0601088	0.183024	0.0877703	0.175506	0.0156798
1922	18S 1009	0.00876454	0.0167737	0.00897849	0.0183694	0.0156798
1923	18S 1010	0.00159865	0.00289077	0.0017756	0.00218392	0.0134506
1924	18S 1011	0.00193147	0.00103135	0.00269837	0.00132419	0.0100741
1925	18S 1012	0.000671366	0.00123609	0.0015996	0.00108932	0.00804376
1926	18S 1013	0.00642095	0.00634596	0.00352467	0.0046472	0.0080658
1927	18S 1014	0.00108288	0.00102249	0.000419428	0.00146945	0.0080658
1928	18S 1015	0.00348982	0.00427699	0.00484423	0.00246914	0.0080658
1929	18S 1016	0.000332254	0.000610749	0.000584307	0.000616903	0.0080658
1930	18S 1017	0.00190681	0.00142305	0.00108397	0.000924499	0.0080658
1931	18S 1018	0.00198577	0.00101543	0.000916361	0.000769823	0.00788468
1932	18S 1019	0.00305205	0.00243112	0.00207831	0.00268714	0.0074559
1933	18S 1020	0.00230434	0.00403551	0.00248777	0.00160969	0.0074559
1934	18S 1021	0.00188927	0.00120919	0.00149044	0.00107198	0.0074559
1935	18S 1022	0.00213115	0.00241255	0.00239551	0.00152905	0.0074559
1936	18S 1023	0.0597349	0.0460299	0.0371431	0.0505916	0.00771854
1937	18S 1024	0.00704118	0.00799087	0.00592979	0.00383225	0.00771854
1938	18S 1025	0.00857425	0.0111007	0.00761143	0.00781979	0.00771854
1939	18S 1026	0.00453206	0.0069133	0.00608329	0.00229046	0.00771854
1940	18S 1027	0.0041372	0.00335196	0.00496663	0.00192885	0.00771854
1941	18S 1028	0.000225615	0.000930233	0.000852912	0.000357066	0.00589391
1942	18S 1029	0.00082657	0.00148616	0.00069735	0.00057098	0.00533333
1943	18S 1030	0.00538117	0.00590951	0.00339768	0.00518319	0.00494438
1944	18S 1031	0.000746826	0.000369208	0.000617379	0.000425834	0.00494438
1945	18S 1032	0.000671692	0.00184264	0.00069407	0.000283809	0.00458554
1946	18S 1033	0.000149243	0.000736513	7.71129e-05	7.09471e-05	0.0045815
1947	18S 1034	0.000223814	0.000368121	0.000308356	0.000567255	0.0045815
1948	18S 1035	0.00119225	0.0007357	0.000308261	0.00042526	0.0044484
1949	18S 1036	7.45101e-05	0.000183891	0.000693107	0.000212585	0.0044484
1950	18S 1037	0.00022353	0	0	0	0.0044287
1951	18S 1038	0	0	7.70119e-05	0	0.00348008
1952	18S 1039	0	0	0.000230982	0.000141703	0.00226126
1953	18S 1040	7.45101e-05	0.000551775	0	0	0.00225499
1954	18S 1041	0	0	0	7.09371e-05	0.00225499
1955	18S 1042	0.000224349	0.000187652	7.72738e-05	0	0.00225499
1956	18S 1043	0	0	0.000386459	0	0.00225499
1957	18S 1044	0	0	0	0	0.00159915
1958	18S 1045	0	0	0	0	0.00177904
1959	18S 1046	0.000149678	0	7.72857e-05	7.09673e-05	0.00177904
1960	18S 1047	0.000149656	0	0	7.09622e-05	0.00212465
1961	18S 1048	0	0.000189215	0	0	0.00212465
1962	18S 1049	0	0	0.00015456	0	0.00212465
1963	18S 1050	0.00059831	0.000189502	0.000231786	0.000141914	0.00212465
1964	18S 1051	0.000971309	0.000947149	0.00161987	7.09622e-05	0.00212465
1965	18S 1052	0.00126856	0.000378716	0.00169413	0.000283768	0.00159716
1966	18S 1053	0.00260494	0.002644	0.00383553	0.000779755	0.00141945
1967	18S 1054	0.00363717	0.00247148	0.00443154	0.00141593	0.00141769
1968	18S 1055	0.00133452	0.00151918	0.0021348	0.000778155	0.00160944
1969	18S 1056	0.000148269	0.00132777	0.000837968	0.000282885	0.00160944
1970	18S 1057	0.000370535	0.00264851	0.000609106	0.000494805	0.0017819
1971	18S 1058	0.000740521	0.00113379	0.000760803	0.000353307	0.0017819
1972	18S 1059	0.00133116	0.00507614	0.000912131	0.000423789	0.0017819
1973	18S 1060	0.00110807	0.0195392	0.00151791	0.000705816	0.0017819
1974	18S 1061	0.00125424	0.0319415	0.00113714	0.000987167	0.0017819
1975	18S 1062	0.00176757	0.00514823	0.0026463	0.00049334	0.00142349
1976	18S 1063	0.000515274	0.000886839	0.000302343	0	0.00142349
1977	18S 1064	7.36052e-05	0.00035461	0	0	0.00142349
1978	18S 1065	0.000147189	0	7.55801e-05	0	0.00106819
1979	18S 1066	7.35889e-05	0	0	0	0.001068
1980	18S 1067	0	0	0	0	0.001068
1981	18S 1068	7.35835e-05	0	0	0	0.00106534
1982	18S 1069	0.000147145	0.000177274	0	7.04722e-05	0.00106534
1983	18S 1070	0	0	0	0	0.00106534
1984	18S 1071	0	0	0	0	0.00106515
1985	18S 1072	0	0	0	0	0.00106515
1986	18S 1073	0	0	0.000226689	7.04672e-05	0.00106515
1987	18S 1074	0	0	0	0	0.00106515
1988	18S 1075	0	0	0	0	0.00106515
1989	18S 1076	0.000147135	0	7.55572e-05	0	0.00106176
1990	18S 1077	0	0	0	0	0.00106176
1991	18S 1078	0	0	0	0	0.00106176
1992	18S 1079	0	0	0.000151114	7.04622e-05	0.00106176
1993	18S 1080	0	0	0	0	0.00106176
1994	18S 1081	0.000220751	0	0	0	0.000885583
1995	18S 1082	0	0	0	0	0.000885583
1996	18S 1083	7.35889e-05	0	0	0	0.000885583
1997	18S 1084	0	0	0	0	0.000885583
1998	18S 1085	0	0	0	0	0.000885583
1999	18S 1086	0	0	0	0	0.00070922
[truncated: 8,001 more rows]

## Sheet: Lsg1_TAP
Template Position	Legend	L5	L27	L35	Wt	Est. Noise
1		0	0	0	0	0
2		0	0	0	0	0
3		0	0	0	0	1
4		0	0	0	0	1
5		0	0	0	0	1
6		0	0	0	0	1
7		0	0	0	0	1
8		0	0	0	0	1
9		0	0	0	0	1
10		0	0	0	0	1
11		0	0	0	0	1
12		0	0	0	0	1
13		0	0	0	0	1
14		0	0	0	0	1
15		0	0	0	0	1
16		0	0	0	0	1
17		0	0	0	0	1
18		0	0	0	0	1
19		0	0	0	0	1
20		0	0	0	0	1
21		0	0	0	0	1
22		0	0	0	0	1
23		0	0	0	0	1
24		0	0	0	0	1
25		0	0	0	0	1
26		0	0	0	0	1
27		0	0	0	0	0
28		0	0	0	0	0
29		0	0	0	0	0
30		0	0	0	0	1
31		0	0	0	0	1
32		0	0	0	0	1
33		0	0	0	0	1
34		0	0	0	0	1
35		0	0	0	0	1
36		0	0	0	0	1
37		0	0	0	0	1
38		0	0	0	0	1
39		0	0	0	0	1
40		0	0	0	0	1
41		0	0	0	0	1
42		0	0	0	0	1
43		0	0	0	0	1
44		0	0	0	0	1
45		0	0	0	0	1
46		0	0	0	0	1
47		0	0	0	0	1
48		0	0	0	0	1
49		0	0	0	0	1
50		0	0	0	0	1
51		0	0	0	0	1
52		0	0	0	0	1
53		0	0	0	0	1
54		0	0	0	0	1
55		0	0	0	0	1
56		0	0	0	0	1
57		0	0	0	0	1
58		0	0	0	0	1
59		0	0	0	0	1
60		0	0	0	0	1
61		0	0	0	0	1
62		0	0	0	0	1
63		0	0	0	0	1
64		0	0	0	0	1
65		0	0	0	0	1
66		0	0	0	0	1
67		0	0	0	0	1
68		0	0	0	0	1
69		0	0	0	0	1
70		0	0	0	0	1
71		0	0	0	0	1
72		0	0	0	0	0
73		0	0	0	0	1
74		0	0	0	0	1
75		0	0	0	0	1
76		0	0	0	0	1
77		0	0	0	0	1
78		0	0	0	0	1
79		0	0	0	0	1
80		0	0	0	0	1
81		0	0	0	0	1
82		0	0	0	0	1
83		0	0	0	0	1
84		0	0	0	0	1
85		0	0	0	0	1
86		0	0	0	0	1
87		0	0	0	0	1
88		0	0	0	0	1
89		0	0	0	0	1
90		0	0	0	0	1
91		0	0	0	0	1
92		0	0	0	0	1
93		0	0	0	0	1
94		0	0	0	0	1
95		0	0	0	0	1
96		0	0	0	0	1
97		0	0	0	0	1
98		0	0	0	0	1
99		0	0	0	0	1
100		0	0	0	0	1
101		0	0	0	0	1
102		0	0	0	0	1
103		0	0	0	0	1
104		0	0	0	0	1
105		0	0	0	0	1
106		0	0	0	0	1
107		0	0	0	0	1
108		0	0	0	0	1
109		0	0	0	0	1
110		0	0	0	0	1
111		0	0	0	0	1
112		0	0	0	0	1
113		0	0	0	0	1
114		0	0	0	0	1
115		0	0	0	0	1
116		0	0	0	0	1
117		0	0	0	0	1
118		0	0	0	0	1
119		0	0	0	0	1
120		0	0	0	0	1
121		0	0	0	0	1
122		0	0	0	0	1
123		0	0	0	0	1
124		0	0	0	0	1
125		0	0	0	0	1
126		0	0	0	0	1
127		0	0	0	0	1
128		0	0	0	0	1
129		0	0	0	0	1
130		0	0	0	0	1
131		0	0	0	0	1
132		0	0	0	0	1
133		0	0	0	0	1
134		0	0	0	0	1
135		0	0	0	0	1
136		0	0	0	0	1
137		0	0	0	0	1
138		0	0	0	0	1
139		0	0	0	0	1
140		0	0	0	0	1
141		0	0	0	0	1
142		0	0	0	0	1
143		0	0	0	0	1
144		0	0	0	0	1
145		0	0	0	0	1
146		0	0	0	0	1
147		0	0	0	0	1
148		0	0	0	0	1
149		0	0	0	0	1
150		0	0	0	0	1
151		0	0	0	0	1
152		0	0	0	0	1
153		0	0	0	0	1
154		0	0	0	0	1
155		0	0	0	0	1
156		0	0	0	0	1
157		0	0	0	0	1
158		0	0	0	0	1
159		0	0	0	0	1
160		0	0	0	0	1
161		0	0	0	0	1
162		0	0	0	0	1
163		0	0	0	0	1
164		0	0	0	0	1
165		0	0	0	0	1
166		0	0	0	0	1
167		0	0	0	0	1
168		0	0	0	0	1
169		0	0	0	0	1
170		0	0	0	0	1
171		0	0	0	0	1
172		0	0	0	0	1
173		0	0	0	0	1
174		0	0	0	0	1
175		0	0	0	0	1
176		0	0	0	0	1
177		0	0	0	0	0.5
178		0	0	0	0	1
179		0	0	0	0	1
180		0	0	0	0	1
181		0	0	0	0	1
182		0	0	0	0	1
183		0	0	0	0	1
184		0	0	0	0	1
185		0	0	0	0	1
186		0	0	0	0	1
187		0	0	0	0	1
188		0	0	0	0	1
189		0	0	0	0	1
190		0	0	0	0	1
191		0	0	0	0	1
192		0	0	0	0	1
193		0	0	0	0	1
194		0	0	0	0	1
195		0	0	0	0	1
196		0	0	0	0	1
197		0	0	0	0	1
198		0	0	0	0	1
199		0	0	0	0	1
200		0	0	0	0	1
201		0	0	0	0	1
202		0	0	0	0	1
203		0	0	0	0	1
204		0	0	0	0	1
205		0	0	0	0	1
206		0	0	0	0	1
207		0	0	0	0	1
208		0	0	0	0	1
209		0	0	0	0	1
210		0	0	0	0	1
211		0	0	0	0	1
212		0	0	0	0	1
213		0	1	1	0	1
214	ETS1 1	1	0.857143	0.625	1	1
215	ETS1 2	0.166667	0	0	0.1	0.166667
216	ETS1 3	0	0.125	0	0	0.166667
217	ETS1 4	0	0	0	0	0.166667
218	ETS1 5	0	0	0	0	0.166667
219	ETS1 6	0	0	0	0	0.166667
220	ETS1 7	0	0	0	0	0.166667
221	ETS1 8	0	0	0	0	0.166667
222	ETS1 9	0	0	0	0	0.166667
223	ETS1 10	0	0	0	0	0.166667
224	ETS1 11	0	0	0	0	0.166667
225	ETS1 12	0	0	0	0	0.166667
226	ETS1 13	0	0	0	0	0.166667
227	ETS1 14	0	0	0	0	0.166667
228	ETS1 15	0	0	0	0	0.166667
229	ETS1 16	0	0	0	0	0.166667
230	ETS1 17	0	0	0	0	0.166667
231	ETS1 18	0	0	0	0	0.166667
232	ETS1 19	0	0	0	0	0.166667
233	ETS1 20	0	0	0	0	0.25
234	ETS1 21	0	0	0	0	0.25
235	ETS1 22	0	0	0	0	0.25
236	ETS1 23	0	0	0	0	0.25
237	ETS1 24	0	0	0	0	0.25
238	ETS1 25	0	0	0	0	0.166667
239	ETS1 26	0	0	0	0	0.166667
240	ETS1 27	0	0	0	0	0.166667
241	ETS1 28	0	0	0	0	0.111111
242	ETS1 29	0	0	0	0	0.111111
243	ETS1 30	0	0	0	0	0.111111
244	ETS1 31	0	0	0	0	0.111111
245	ETS1 32	0	0	0	0	0.111111
246	ETS1 33	0	0	0	0	0.111111
247	ETS1 34	0	0	0	0	0.111111
248	ETS1 35	0	0	0	0	0.111111
249	ETS1 36	0	0	0	0	0.111111
250	ETS1 37	0	0	0	0	0.111111
251	ETS1 38	0	0	0	0	0.142857
252	ETS1 39	0	0	0	0	0.142857
253	ETS1 40	0	0	0	0	0.142857
254	ETS1 41	0	0	0	0	0.142857
255	ETS1 42	0	0	0	0	0.142857
256	ETS1 43	0	0	0	0	0.142857
257	ETS1 44	0	0	0	0	0.142857
258	ETS1 45	0	0	0	0	0.142857
259	ETS1 46	0	0	0	0	0.142857
260	ETS1 47	0	0	0	0	0.111111
261	ETS1 48	0	0	0	0	0
262	ETS1 49	0	0	0	0	0
263	ETS1 50	0	0	0	0	0
264	ETS1 51	0	0	0	0	0
265	ETS1 52	0	0	0	0	0
266	ETS1 53	0	0	0	0	0
267	ETS1 54	0	0	0	0	0
268	ETS1 55	0	0	0	0	0
269	ETS1 56	0	0	0	0	0
270	ETS1 57	0	0	0	0	0
271	ETS1 58	0	0	0	0	0
272	ETS1 59	0	0	0	0	0
273	ETS1 60	0	0	0	0	0
274	ETS1 61	0	0	0	0	0
275	ETS1 62	0	0	0	0	0
276	ETS1 63	0	0	0	0	0
277	ETS1 64	0	0	0	0	0
278	ETS1 65	0	0	0	0	0.142857
279	ETS1 66	0	0	0	0	0.142857
280	ETS1 67	0	0	0	0	0.142857
281	ETS1 68	0	0	0	0	0.142857
282	ETS1 69	0	0	0	0	0.142857
283	ETS1 70	0	0	0	0	0.111111
284	ETS1 71	0	0	0	0	0.111111
285	ETS1 72	0	0	0	0	0.111111
286	ETS1 73	0	0	0	0	0.111111
287	ETS1 74	0	0	0	0	0.111111
288	ETS1 75	0	0	0	0	0
289	ETS1 76	0	0	0	0	0
290	ETS1 77	0	0	0	0	0
291	ETS1 78	0	0	0	0	0
292	ETS1 79	0	0	0	0	0
293	ETS1 80	0	0	0	0	0.111111
294	ETS1 81	0	0	0	0	0.111111
295	ETS1 82	0	0	0	0	0.111111
296	ETS1 83	0	0	0	0	0.111111
297	ETS1 84	0	0	0	0	0.111111
298	ETS1 85	0	0	0	0	0.111111
299	ETS1 86	0	0	0	0	0.111111
300	ETS1 87	0	0	0	0	0.111111
301	ETS1 88	0	0	0	0	0.111111
302	ETS1 89	0	0	0	0	0.111111
303	ETS1 90	0	0	0	0	0.111111
304	ETS1 91	0	0	0	0	0.111111
305	ETS1 92	0	0	0	0	0.111111
306	ETS1 93	0	0	0	0	0.142857
307	ETS1 94	0	0	0	0	0.142857
308	ETS1 95	0	0	0	0	0.2
309	ETS1 96	0	0	0	0	0.2
310	ETS1 97	0	0	0	0	0.2
311	ETS1 98	0	0	0	0	0.2
312	ETS1 99	0	0	0	0	0.2
313	ETS1 100	0	0	0	0	0
314	ETS1 101	0	0	0	0	0.2
315	ETS1 102	0	0	0	0	0.2
316	ETS1 103	0	0	0	0	0.2
317	ETS1 104	0	0	0	0	0.2
318	ETS1 105	0	0	0	0	0.2
319	ETS1 106	0	0	0	0	0.2
320	ETS1 107	0	0	0	0	0
321	ETS1 108	0	0	0	0	0
322	ETS1 109	0	0	0	0	1
323	ETS1 110	0	0	0	0	1
324	ETS1 111	0	0	0	0	1
325	ETS1 112	0	0	0	0	1
326	ETS1 113	0	0	0	0	1
327	ETS1 114	0	0	0	0	1
328	ETS1 115	0	0	0	0	1
329	ETS1 116	0	0	0	0	1
330	ETS1 117	0	0	0	0	1
331	ETS1 118	0	0	0	0	1
332	ETS1 119	0	0	0	0	0.333333
333	ETS1 120	0	0	0	0	0
334	ETS1 121	0	0	0	0	0
335	ETS1 122	0	0	0	0	0
336	ETS1 123	0	0	0	0	0
337	ETS1 124	0	0	0	0	0
338	ETS1 125	0	0	0	0	0
339	ETS1 126	0	0	0	0	0
340	ETS1 127	0	0	0	0	0
341	ETS1 128	0	0	0	0	0
342	ETS1 129	0	0	0	0	0
343	ETS1 130	0	0	0	0	0
344	ETS1 131	0	0	0	0	0
345	ETS1 132	0	0	0	0	0
346	ETS1 133	0	0	0	0	0
347	ETS1 134	0	0	0	0	0
348	ETS1 135	0	0	0	0	0
349	ETS1 136	0	0	0	0	0
350	ETS1 137	0	0	0	0	0
351	ETS1 138	0	0	0	0	0
352	ETS1 139	0	0	0	0	0
353	ETS1 140	0	0	0	0	0
354	ETS1 141	0	0	0	0	0
355	ETS1 142	0	0	0	0	0
356	ETS1 143	0	0	0	0	0
357	ETS1 144	0	0	0	0	0.5
358	ETS1 145	0	0	0	0	0.5
359	ETS1 146	0	0	0	0	0.5
360	ETS1 147	0	0	0	0	1
361	ETS1 148	0	0	0	0	1
362	ETS1 149	0	0	0	0	1
363	ETS1 150	0	0	0	0	1
364	ETS1 151	0	0	0	0	1
365	ETS1 152	0	0	0	0	1
366	ETS1 153	0	0	0	0	1
367	ETS1 154	0	0	0	0	1
368	ETS1 155	0	1	0	0	1
369	ETS1 156	0	0	0	0	1
370	ETS1 157	0	0	0	0	1
371	ETS1 158	0	0	0	0	1
372	ETS1 159	0	0	0	0	1
373	ETS1 160	0	0	0	0	1
374	ETS1 161	0	0	0	0	1
375	ETS1 162	0	0	0	0	1
376	ETS1 163	0	0	0	0	1
377	ETS1 164	0	0	0	0	1
378	ETS1 165	0	0	0	0	1
379	ETS1 166	0	0	0	0	1
380	ETS1 167	0	0	0	0	1
381	ETS1 168	0	0	0	0	1
382	ETS1 169	0	0	0	0	1
383	ETS1 170	0	0	0	0	1
384	ETS1 171	0	0	0	0	1
385	ETS1 172	0	0	0	0	1
386	ETS1 173	0	0	0	0	1
387	ETS1 174	0	0	0	0	1
388	ETS1 175	0	0	0	0	1
389	ETS1 176	0	0	0	0	1
390	ETS1 177	0	0	0	0	1
391	ETS1 178	0	0	0	0	1
392	ETS1 179	0	0	0	0	1
393	ETS1 180	0	0	0	0	1
394	ETS1 181	0	0	0	0	1
395	ETS1 182	0	0	0	0	1
396	ETS1 183	0	0	0	0	1
397	ETS1 184	0	0	0	0	1
398	ETS1 185	0	0	0	0	1
399	ETS1 186	0	0	0	0	1
400	ETS1 187	0	0	0	0	1
401	ETS1 188	0	0	0	0	1
402	ETS1 189	0	0	0	0	1
403	ETS1 190	0	0	0	0	1
404	ETS1 191	0	0	0	0	1
405	ETS1 192	0	0	0	0	1
406	ETS1 193	0	0	0	0	1
407	ETS1 194	0	0	0	0	1
408	ETS1 195	0	0	0	0	1
409	ETS1 196	0	0	0	0	1
410	ETS1 197	0	0	0	0	1
411	ETS1 198	0	0	0	0	1
412	ETS1 199	0	0	0	0	1
413	ETS1 200	0	0	0	0	1
414	ETS1 201	0	0	0	0	1
415	ETS1 202	0	0	0	0	1
416	ETS1 203	0	0	0	0	1
417	ETS1 204	0	0	0	0	1
418	ETS1 205	0	0	0	0	1
419	ETS1 206	0	0	0	0	1
420	ETS1 207	0	0	0	0	1
421	ETS1 208	0	0	0	0	1
422	ETS1 209	0	0	0	0	1
423	ETS1 210	0	0	0	0	1
424	ETS1 211	0	0	0	0	1
425	ETS1 212	0	0	0	0	1
426	ETS1 213	0	0	0	0	1
427	ETS1 214	0	0	0	0	1
428	ETS1 215	0	0	0	0	1
429	ETS1 216	0	0	0	0	1
430	ETS1 217	0	0	0	0	1
431	ETS1 218	0	0	0	0	1
432	ETS1 219	0	0	0	0	1
433	ETS1 220	0	0	0	0	1
434	ETS1 221	0	0	0	0	1
435	ETS1 222	0	0	0	0	1
436	ETS1 223	0	0	0	0	1
437	ETS1 224	0	0	0	0	1
438	ETS1 225	0	0	0	0	1
439	ETS1 226	0	0	0	0	1
440	ETS1 227	0	0	0	0	1
441	ETS1 228	0	0	0	0	1
442	ETS1 229	0	0	0	0	1
443	ETS1 230	0	0	0	0	1
444	ETS1 231	0	0	0	0	1
445	ETS1 232	0	0	0	0	1
446	ETS1 233	0	0	0	0	1
447	ETS1 234	0	0	0	0	1
448	ETS1 235	0	0	0	0	1
449	ETS1 236	0	0	0	0	1
450	ETS1 237	0	0	0	0	1
451	ETS1 238	0	0	0	0	1
452	ETS1 239	0	0	0	0	1
453	ETS1 240	0	0	0	0	1
454	ETS1 241	0	0	0	0	1
455	ETS1 242	0	0	0	0	1
456	ETS1 243	0	0	0	0	1
457	ETS1 244	0	0	0	0	1
458	ETS1 245	0	0	0	0	1
459	ETS1 246	0	0	0	0	1
460	ETS1 247	0	0	0	0	0.5
461	ETS1 248	0	0	0	0	0.5
462	ETS1 249	0	0	0	0	0.5
463	ETS1 250	0	0	0	0	0
464	ETS1 251	0	0	0	0	1
465	ETS1 252	0	0	0	0	1
466	ETS1 253	0	0	0	0	1
467	ETS1 254	0	0	0	0	1
468	ETS1 255	0	0	0	0	1
469	ETS1 256	0	0	0	0	1
470	ETS1 257	0	0	0	0	1
471	ETS1 258	0	0	0	0	1
472	ETS1 259	0	0	0	0	1
473	ETS1 260	0	0	0	0	1
474	ETS1 261	0	0	0	0	1
475	ETS1 262	0	0	0	0	1
476	ETS1 263	0	0	0	0	1
477	ETS1 264	0	0	0	0	1
478	ETS1 265	0	0	0	0	1
479	ETS1 266	0	0	0	0	1
480	ETS1 267	0	0	0	0	1
481	ETS1 268	0	0	0	0	1
482	ETS1 269	0	0	0	0	1
483	ETS1 270	0	0	0	0	1
484	ETS1 271	0	0	0	0	1
485	ETS1 272	0	0	0	0	1
486	ETS1 273	0	0	0	0	1
487	ETS1 274	0	0	0	0	1
488	ETS1 275	0	0	0	0	1
489	ETS1 276	0	0	0	0	1
490	ETS1 277	0	0	0	0	1
491	ETS1 278	0	0	0	0	1
492	ETS1 279	0	0	0	0	1
493	ETS1 280	0	0	0	0	0
494	ETS1 281	0	0	0	0	0
495	ETS1 282	0	0	0	0	0
496	ETS1 283	0	0	0	0	0
497	ETS1 284	0	0	0	0	0
498	ETS1 285	0	0	0	0	1
499	ETS1 286	0	0	0	0	1
500	ETS1 287	0	0	0	0	1
501	ETS1 288	0	0	0	0	1
502	ETS1 289	0	0	0	0	1
503	ETS1 290	0	0	0	0	1
504	ETS1 291	0	0	0	0	1
505	ETS1 292	0	0	0	0	1
506	ETS1 293	0	0	0	0	1
507	ETS1 294	0	0	0	0	1
508	ETS1 295	0	0	0	0	1
509	ETS1 296	0	0	0	0	1
510	ETS1 297	0	0	0	0	1
511	ETS1 298	0	0	0	0	1
512	ETS1 299	0	0	0	0	1
513	ETS1 300	0	0	0	0	0
514	ETS1 301	0	0	0	0	1
515	ETS1 302	0	0	0	0	1
516	ETS1 303	1	0	0	0	1
517	ETS1 304	0	0	0	0	1
518	ETS1 305	0	0	0	0	1
519	ETS1 306	0	0	0	0	1
520	ETS1 307	0	0	0	0	1
521	ETS1 308	0	0	0	0	1
522	ETS1 309	0	0	0	0	1
523	ETS1 310	0	0	0	0	1
524	ETS1 311	0	0	0	0	0.5
525	ETS1 312	0	0	0	0	0.5
526	ETS1 313	0	0	0	0	0.5
527	ETS1 314	0	0	0	0	0.5
528	ETS1 315	0	0	0	0	0.5
529	ETS1 316	0	0	0	0	0.5
530	ETS1 317	0	0	0	0	0.5
531	ETS1 318	0	0	0	0	1
532	ETS1 319	0	0	0	0	1
533	ETS1 320	0	0	0	0	1
534	ETS1 321	0	0	0	0	1
535	ETS1 322	0	0	0	0	1
536	ETS1 323	0	0	0	0	1
537	ETS1 324	0	0	0	0	1
538	ETS1 325	0	0	0	0	1
539	ETS1 326	0	0.5	0	0	1
540	ETS1 327	0	0	0	0	1
541	ETS1 328	0	0	0	0	1
542	ETS1 329	0	0	0	0	1
543	ETS1 330	0	0	0	0	1
544	ETS1 331	0	0	0	0	1
545	ETS1 332	0	0	0	0	1
546	ETS1 333	0	0	0	0	1
547	ETS1 334	0	0	0	0	1
548	ETS1 335	0	0	0	0	1
549	ETS1 336	0	0	0	0	1
550	ETS1 337	0	0	0	0	1
551	ETS1 338	0	0	0	0	1
552	ETS1 339	0	0	0	0	1
553	ETS1 340	0	0	0	0	1
554	ETS1 341	0	0	0	0	1
555	ETS1 342	0	0	0	0	1
556	ETS1 343	0	0	0	0	1
557	ETS1 344	0	0	0	0	1
558	ETS1 345	0	0	0	0	1
559	ETS1 346	0	0	0	0	1
560	ETS1 347	0	0	0	0	1
561	ETS1 348	0	0	0	0	1
562	ETS1 349	0	0	0	0	1
563	ETS1 350	0	0	0	0	1
564	ETS1 351	0	0	0	0	1
565	ETS1 352	0	0	0	0	1
566	ETS1 353	0	0	0	0	1
567	ETS1 354	0	0	0	0	1
568	ETS1 355	0	0	0	0	1
569	ETS1 356	0	0	0	0	1
570	ETS1 357	0	0	0	0	1
571	ETS1 358	0	0	0	0	1
572	ETS1 359	0	0	0	0	1
573	ETS1 360	0	0	0	0	1
574	ETS1 361	0	0	0	0	1
575	ETS1 362	0	0	0	0	1
576	ETS1 363	0	0	0	1	1
577	ETS1 364	0	0	0	0	1
578	ETS1 365	0	0	0	0	1
579	ETS1 366	0	0	0	0	1
580	ETS1 367	0	0	0	0	1
581	ETS1 368	0	0	0	0	1
582	ETS1 369	0	0	0	0	1
583	ETS1 370	0	0	0	0	1
584	ETS1 371	0	0	0	0	1
585	ETS1 372	0	0	0	0	1
586	ETS1 373	0	0	0	0	1
587	ETS1 374	0	0	0	0	1
588	ETS1 375	0	0	0	0	1
589	ETS1 376	0	0	0	0	1
590	ETS1 377	0	0	0	0	1
591	ETS1 378	0	0	0	0	1
592	ETS1 379	0	0	0	0	1
593	ETS1 380	0	0	0	0	1
594	ETS1 381	0	0	0	0	1
595	ETS1 382	0	0	0	0	1
596	ETS1 383	0	0	0	0	1
597	ETS1 384	0	0	0	0	1
598	ETS1 385	0	0	0	0	1
599	ETS1 386	0	0	0	0	1
600	ETS1 387	0	0	0	0	1
601	ETS1 388	0	0	0	0	1
602	ETS1 389	0	0	0	0	1
603	ETS1 390	0	0	0	0	1
604	ETS1 391	0	0	0	0	1
605	ETS1 392	0	0	0	0	1
606	ETS1 393	0	0	0	0	1
607	ETS1 394	0	0	0	0	1
608	ETS1 395	0	0	0	0	1
609	ETS1 396	0	0	0	0	1
610	ETS1 397	0	0	0	0	1
611	ETS1 398	0	0	0	0	1
612	ETS1 399	0	0	0	0	1
613	ETS1 400	0	0	0	0	1
614	ETS1 401	0	0	0	0	1
615	ETS1 402	0	0	0	0	1
616	ETS1 403	0	0	0	0	1
617	ETS1 404	0	0	0	0	1
618	ETS1 405	0	0	0	0	1
619	ETS1 406	0	0	0	0	1
620	ETS1 407	0	0	0	0	1
621	ETS1 408	0	0	0	0	1
622	ETS1 409	0	0	0	0	1
623	ETS1 410	0	0	0	0	1
624	ETS1 411	0	0	0	0	1
625	ETS1 412	0	0	0	0	1
626	ETS1 413	0	0	0	0	1
627	ETS1 414	0	0	0	0	1
628	ETS1 415	0	0	0	0	1
629	ETS1 416	0	0	0	0	1
630	ETS1 417	0	0	0	0	1
631	ETS1 418	0	0	0	0	1
632	ETS1 419	0	0	0	0	1
633	ETS1 420	0	0	0	0	1
634	ETS1 421	0	0	0	0	1
635	ETS1 422	0	0	0	0	1
636	ETS1 423	0	0	0	0	1
637	ETS1 424	0	0	0	0	1
638	ETS1 425	0	0	0	0	1
639	ETS1 426	0	0	0	0	1
640	ETS1 427	0	0	0	0	1
641	ETS1 428	0	0	0	0	1
642	ETS1 429	0	0	0	0	1
643	ETS1 430	0	0	0	0	1
644	ETS1 431	0	0	0	0	1
645	ETS1 432	0	0	0	0	1
646	ETS1 433	0	0	0	0	1
647	ETS1 434	0	0	0	0	1
648	ETS1 435	0	0	0	0	1
649	ETS1 436	0	0	0	0	1
650	ETS1 437	0	0	0	0	1
651	ETS1 438	0	0	0	0	1
652	ETS1 439	0	0	0	0	1
653	ETS1 440	0	0	0	0	1
654	ETS1 441	0	0	0	0	1
655	ETS1 442	0	0	0	0	1
656	ETS1 443	0	0	0	0	1
657	ETS1 444	0	0	0	0	1
658	ETS1 445	0	0	0	0	1
659	ETS1 446	0	0	0	0	1
660	ETS1 447	0	0	0	0	1
661	ETS1 448	0	0	0	0	0.5
662	ETS1 449	0	0	0	0	0.5
663	ETS1 450	0	0	0	0	1
664	ETS1 451	0	0	0	0	1
665	ETS1 452	0	0	0	0	1
666	ETS1 453	0	0	0	0	1
667	ETS1 454	0	0	0	0	1
668	ETS1 455	0	0	0	0	1
669	ETS1 456	0	0	0	0	1
670	ETS1 457	0	0	0	0	1
671	ETS1 458	0	0	0	0	1
672	ETS1 459	0	0	0	0	0.5
673	ETS1 460	0	0	0	0	0.4
674	ETS1 461	0	0	0	0	0.5
675	ETS1 462	0	0	0	0	0.5
676	ETS1 463	0	0	0	0	0.5
677	ETS1 464	0	0	0	0	1
678	ETS1 465	0	0	0	0	1
679	ETS1 466	0	0	0	0	1
680	ETS1 467	0	0	0	0	1
681	ETS1 468	0	0	0	0	1
682	ETS1 469	0	0	0	0	1
683	ETS1 470	0	0	0	0	1
684	ETS1 471	0	0	0	0	1
685	ETS1 472	0.666667	0	0	0	1
686	ETS1 473	0	0	0	0	1
687	ETS1 474	0	0	0	0	1
688	ETS1 475	0	0	0	0	1
689	ETS1 476	0	0	0	0	1
690	ETS1 477	0	0	0	0	1
691	ETS1 478	0	0	0	0	1
692	ETS1 479	0	0	0	0	1
693	ETS1 480	0	0	0	0	1
694	ETS1 481	0	0	0	0	1
695	ETS1 482	0	0	0	0	1
696	ETS1 483	0	0	0	0	1
697	ETS1 484	0	0	0	0	1
698	ETS1 485	0	0	0	0	1
699	ETS1 486	0	0	0	0	1
700	ETS1 487	0	0	0	0	1
701	ETS1 488	0	0	0	0	1
702	ETS1 489	0	0	0	0	1
703	ETS1 490	0	0	0	0	1
704	ETS1 491	0	0	0	0	1
705	ETS1 492	0	0	0	0	1
706	ETS1 493	0	0	0	0	1
707	ETS1 494	0	0	0	0	1
708	ETS1 495	0	0	0	0	1
709	ETS1 496	0	0	0	0	1
710	ETS1 497	0	0	0	0	1
711	ETS1 498	0	0	0	0	1
712	ETS1 499	0	0	0	0	1
713	ETS1 500	0	0	0	0	1
714	ETS1 501	0	0	0	0	1
715	ETS1 502	0	0	0	0	1
716	ETS1 503	0	0	0	0	1
717	ETS1 504	0	0	0	0	1
718	ETS1 505	0	0	0	0	1
719	ETS1 506	0	0	0	0	1
720	ETS1 507	0	0	0	0	1
721	ETS1 508	0	0	0	0	1
722	ETS1 509	0	0	0	0	1
723	ETS1 510	0	0	0	0	1
724	ETS1 511	0	0	0	0	1
725	ETS1 512	0	0	0	0	1
726	ETS1 513	0	0	0	0	1
727	ETS1 514	0	0	0	0	1
728	ETS1 515	0	0	0	0	1
729	ETS1 516	0	0	0	0	1
730	ETS1 517	0	0	0	0	1
731	ETS1 518	0	0	0	0	1
732	ETS1 519	0	0	0	0	1
733	ETS1 520	0	0	0	0	1
734	ETS1 521	0	0	0	0	1
735	ETS1 522	0	0	0	0	0.5
736	ETS1 523	0	0	0	0	1
737	ETS1 524	0	0	0	0	1
738	ETS1 525	0	0	0	0	1
739	ETS1 526	0	0	0	0	1
740	ETS1 527	0	0	0	0	1
741	ETS1 528	0	0	0	0	1
742	ETS1 529	0	0	0	0	1
743	ETS1 530	0	0	0	0	1
744	ETS1 531	0	0	0	0	1
745	ETS1 532	0	0	0	0	1
746	ETS1 533	0	0	0	0	1
747	ETS1 534	0	0	0	0	1
748	ETS1 535	0	0	0	0	1
749	ETS1 536	0	0	0	0	1
750	ETS1 537	0	0	0	0	1
751	ETS1 538	0	0	0	0	1
752	ETS1 539	0	0	0	0	1
753	ETS1 540	0	0	0	0	1
754	ETS1 541	0	0	0	0	1
755	ETS1 542	0	0	0	0	1
756	ETS1 543	0	0	0	0	1
757	ETS1 544	0	0	0	0	1
758	ETS1 545	0	0	0	0	1
759	ETS1 546	0	0	0	0	1
760	ETS1 547	0	0	0	0	1
761	ETS1 548	0	0	0	0	1
762	ETS1 549	0	0	0	0	1
763	ETS1 550	0	0	0	0	1
764	ETS1 551	0	0	0	0	1
765	ETS1 552	0	0	0	0	0.5
766	ETS1 553	0	0	0	0	0.5
767	ETS1 554	0	0	0	0	1
768	ETS1 555	0	0	0	0	1
769	ETS1 556	0	0	0	0	1
770	ETS1 557	0	0	0	0	1
771	ETS1 558	0	0	0	0	1
772	ETS1 559	0	0	0	0	1
773	ETS1 560	0	0	0	0	1
774	ETS1 561	0	0	0	0	1
775	ETS1 562	0	0	0	0	1
776	ETS1 563	0	0	0	0	1
777	ETS1 564	0	0	0	0	1
778	ETS1 565	0	0	0	0	1
779	ETS1 566	0	0	0	0	1
780	ETS1 567	0	0	0	0	1
781	ETS1 568	0	0	0	0	1
782	ETS1 569	0	0	0	0	1
783	ETS1 570	0	0	0	0	0.666667
784	ETS1 571	0	0	0	0	0.666667
785	ETS1 572	0	0	0	0	0.5
786	ETS1 573	0	0	0	0	0.5
787	ETS1 574	0	0	0	0	0.5
788	ETS1 575	0	0	0	0	0.5
789	ETS1 576	0	0	0	0	1
790	ETS1 577	0	0	0	0	1
791	ETS1 578	0	0	0	0	1
792	ETS1 579	0	0	0	0	1
793	ETS1 580	0	0	0	0	1
794	ETS1 581	0	0	0	0	0.666667
795	ETS1 582	0	0	0	0	0.75
796	ETS1 583	0	0	0	0	0.75
797	ETS1 584	0	0	0	0	0.75
798	ETS1 585	0	0	0	0	0.75
799	ETS1 586	0	0	0	0	0.75
800	ETS1 587	0	0	0	0	0.666667
801	ETS1 588	0	0	0	0	0.666667
802	ETS1 589	0	0	0	0	0.571429
803	ETS1 590	0	0	0	0	0.571429
804	ETS1 591	0	0	0	0	0.571429
805	ETS1 592	0	0	0	0	0.375
806	ETS1 593	0	0	0	0	0.25
807	ETS1 594	0	0	0	0	0.25
808	ETS1 595	0	0	0	0	0.25
809	ETS1 596	0	0	0	0	0.25
810	ETS1 597	0	0	0	0	0.285714
811	ETS1 598	0.333333	0	0	0	0.285714
812	ETS1 599	0	0	0	0	0.285714
813	ETS1 600	0	0	0	0	0.285714
814	ETS1 601	0	0	0	0	0.291667
815	ETS1 602	0	0	0	0	0.375
816	ETS1 603	0	0	0	0	0.375
817	ETS1 604	0	0	0	0	0.375
818	ETS1 605	0	0	0	0	0.375
819	ETS1 606	0	0	0	0	0.375
820	ETS1 607	0	0	0	0	0.217391
821	ETS1 608	0	0	0	0	0.192308
822	ETS1 609	0	0	0	0	0.148148
823	ETS1 610 (A0)	0	0	0	0	0.148148
824	ETS1 611	0	0	0	0	0.148148
825	ETS1 612	0	0	0	0	0.148148
826	ETS1 613	0	0	0	0	0.148148
827	ETS1 614	0	0	0	0	0.157895
828	ETS1 615	0	0	0	0	0.176471
829	ETS1 616	0	0	0	0	0.1875
830	ETS1 617	0	0	0	0	0.214286
831	ETS1 618	0	0	0	0	0.214286
832	ETS1 619	0	0	0	0	0.263158
833	ETS1 620	0	0	0	0	0.263158
834	ETS1 621	0	0	0	0	0.263158
835	ETS1 622	0	0	0	0	0.263158
836	ETS1 623	0	0	0	0	0.263158
837	ETS1 624	0	0	0	0	0.197183
838	ETS1 625	0	0	0	0	0.134615
839	ETS1 626	0	0	0	0	0.0945946
840	ETS1 627	0	0	0	0	0.078125
841	ETS1 628	0	0	0	0	0.0645161
842	ETS1 629	0	0	0	0	0.0645161
843	ETS1 630	0	0	0	0	0.0645161
844	ETS1 631	0	0	0	0	0.0638298
845	ETS1 632	0	0	0	0	0.0638298
846	ETS1 633	0	0	0	0	0.0510204
847	ETS1 634	0	0	0	0	0.0510204
848	ETS1 635	0	0	0	0	0.0535714
849	ETS1 636	0	0	0	0	0.0535714
850	ETS1 637	0	0	0	0	0.0786517
851	ETS1 638	0	0	0	0	0.0786517
852	ETS1 639	0	0	0	0	0.0786517
853	ETS1 640	0	0	0	0	0.0786517
854	ETS1 641	0	0	0	0	0.0786517
855	ETS1 642	0	0	0	0	0.0684932
856	ETS1 643	0	0	0	0	0.0684932
857	ETS1 644	0	0	0	0	0.0684932
858	ETS1 645	0	0	0	0	0.0555556
859	ETS1 646	0	0	0	0	0.0555556
860	ETS1 647	0	0	0	0	0.0555556
861	ETS1 648	0	0	0	0	0.0517241
862	ETS1 649	0	0	0	0	0.0517241
863	ETS1 650	0	0	0	0	0.0485437
864	ETS1 651	0	0	0	0	0.0485437
865	ETS1 652	0	0	0	0	0.0485437
866	ETS1 653	0	0	0	0	0.0487805
867	ETS1 654	0	0	0	0	0.05
868	ETS1 655	0	0	0	0	0.05
869	ETS1 656	0	0	0	0	0.0677966
870	ETS1 657	0	0	0	0	0.0677966
871	ETS1 658	0	0	0	0	0.0677966
872	ETS1 659	0	0	0	0	0.0677966
873	ETS1 660	0	0	0	0	0.0677966
874	ETS1 661	0	0	0	0	0.0510204
875	ETS1 662	0	0	0	0	0.0510204
876	ETS1 663	0	0	0	0	0.0512821
877	ETS1 664	0	0	0	0	0.0526316
878	ETS1 665	0	0	0	0	0.0526316
879	ETS1 666	0	0	0	0	0.0526316
880	ETS1 667	0	0	0	0	0.0526316
881	ETS1 668	0	0	0	0	0.0583333
882	ETS1 669	0	0	0	0	0.0583333
883	ETS1 670	0	0	0	0	0.0583333
884	ETS1 671	0	0	0	0	0.0583333
885	ETS1 672	0	0	0	0	0.0583333
886	ETS1 673	0	0	0	0	0.057971
887	ETS1 674	0	0	0	0	0.0526316
888	ETS1 675	0	0	0	0	0.0496454
889	ETS1 676	0	0	0	0	0.0536913
890	ETS1 677	0	0	0	0	0.0536913
891	ETS1 678	0	0	0	0	0.0536913
892	ETS1 679	0	0	0	0	0.0540541
893	ETS1 680	0	0	0	0	0.0540541
894	ETS1 681	0	0	0	0	0.0540541
895	ETS1 682	0	0	0	0	0.0689655
896	ETS1 683	0	0	0	0	0.0689655
897	ETS1 684	0	0	0	0	0.0689655
898	ETS1 685	0	0	0	0	0.0689655
899	ETS1 686	0	0	0	0	0.0723684
900	ETS1 687	0	0	0	0	0.0723684
901	ETS1 688	0	0	0	0	0.0723684
902	ETS1 689	0	0	0	0	0.0723684
903	ETS1 690	0	0	0	0	0.0723684
904	ETS1 691	0	0	0	0	0.047619
905	ETS1 692	0	0	0	0	0.047619
906	ETS1 693	0	0	0	0	0.046729
907	ETS1 694	0	0	0	0	0.0425532
908	ETS1 695	0.5	0	0	0	0.0485437
909	ETS1 696	0	1	0	0	0.0744681
910	ETS1 697	0	0	0	0	0.0744681
911	ETS1 698	0.5	0.75	0	1	0.0744681
912	ETS1 699	0.636364	0.555556	1	0.75	0.0744681
913	ETS1 700	0.607143	0.709677	0.75	0.5	0.0744681
914	18S 1	0.929825	0.906627	0.912088	0.942446	0.025641
915	18S 2	0.121145	0.100271	0.116505	0.283505	0.025641
916	18S 3	0.0236559	0.0238095	0.0283019	0.0251256	0.025641
917	18S 4	0.00428266	0	0.00934579	0	0.0261283
918	18S 5	0.00638298	0	0	0.005	0.0261283
919	18S 6	0.00212314	0.00263852	0	0	0.0261283
920	18S 7	0	0.00263158	0	0.00990099	0.0261283
921	18S 8	0.00211864	0.0052356	0	0	0.0261283
922	18S 9	0.00211416	0.00261097	0.0183486	0	0.0247525
923	18S 10	0.0021097	0	0.00909091	0	0.0247525
924	18S 11	0.00628931	0.0103359	0.00900901	0	0.0382775
925	18S 12	0	0.00769231	0	0.00492611	0.0382775
926	18S 13	0	0	0.00892857	0.00490196	0.0382775
927	18S 14	0	0.00255754	0	0	0.0382775
928	18S 15	0	0.00255102	0.00884956	0	0.0382775
929	18S 16	0	0	0	0	0.0377358
930	18S 17	0	0	0	0	0.0377358
931	18S 18	0	0	0	0.00487805	0.0377358
932	18S 19	0.00209205	0.00254453	0.00877193	0.00485437	0.027027
933	18S 20	0.00416667	0.0150376	0.025641	0	0.0264317
934	18S 21	0.0283401	0.0268293	0.00847458	0	0.0264317
935	18S 22	0.0313726	0.028436	0.0483871	0.0373832	0.0244898
936	18S 23	0.0116279	0.00705882	0.015873	0.00925926	0.0244898
937	18S 24	0.0601093	0.107143	0.207547	0.0226244	0.0242424
938	18S 25	0.016129	0.0245902	0.0363636	0.0307018	0.0311615
939	18S 26	0.173333	0.158621	0.282609	0.445255	0.0311615
940	18S 27	0.0188953	0.0397351	0.0128755	0.0352113	0.0311615
941	18S 28	0.0575342	0.0635659	0.068	0.0596026	0.0311615
942	18S 29	0.0135135	0.0122511	0.00793651	0.00220264	0.0311615
943	18S 30	0.00134953	0.00305344	0	0	0.0295858
944	18S 31	0	0	0	0.0021978	0.0295858
945	18S 32	0.00403226	0.00304414	0	0.00219298	0.0268817
946	18S 33	0.00134228	0.00151976	0	0.00218818	0.0268817
947	18S 34	0.00134048	0.0030303	0	0	0.0268817
948	18S 35	0.00133869	0.0075188	0.0117647	0.00218341	0.0227273
949	18S 36	0.0013369	0	0	0	0.022409
950	18S 37	0.00399467	0.00449102	0.015444	0.0107991	0.0234987
951	18S 38	0.033462	0.0233918	0.0335821	0.165766	0.0234987
952	18S 39	0.0152091	0.0172414	0.0289855	0.0703518	0.0234987
953	18S 40	0.0149813	0.0141643	0.0107527	0.0115894	0.0254237
954	18S 41	0.0111111	0.0208044	0.0141343	0.00657895	0.0254237
955	18S 42	0.00613497	0.00551724	0.00352113	0.00164204	0.0254237
956	18S 43	0.0759637	0.0787802	0.0501672	0.0145631	0.0254237
957	18S 44	0.0145251	0.00631313	0.0164474	0.00802568	0.0254237
958	18S 45	0.00665927	0.0075188	0.00977199	0.00637959	0.0227273
959	18S 46	0.0131435	0.0220588	0.028481	0.0263975	0.0227273
960	18S 47	0.0182796	0.0250896	0.0125	0.00463679	0.0227273
961	18S 48	0.00428266	0.00829384	0.00928793	0	0.0227273
962	18S 49	0.00106952	0.00118343	0.00308642	0.00154321	0.0203046
963	18S 50	0	0.00118203	0	0	0.0275689
964	18S 51	0.00425985	0.00587544	0.0151976	0.0255639	0.0275689
965	18S 52	0	0	0	0.0015015	0.0301508
966	18S 53	0.0021254	0	0.0030303	0	0.0301508
967	18S 54	0.00317797	0	0	0.00149925	0.0301508
968	18S 55	0.0135841	0.00815851	0.0207715	0.0416667	0.0301508
969	18S 56	0.00416233	0.00116414	0	0.00286533	0.0334129
970	18S 57	0.00311203	0.00116279	0	0	0.0486111
971	18S 58	0.00720906	0.00578035	0.0117302	0.00285714	0.0486111
972	18S 59	0.0020555	0.00115473	0	0.00142653	0.0486111
973	18S 60	0.00307377	0.00230415	0.00872093	0.00284495	0.0486111
974	18S 61	0.0151362	0.0125142	0.0143266	0.0154062	0.0486111
975	18S 62	0.0119641	0.00565611	0.0169014	0.0013986	0.03125
976	18S 63	0.00496032	0.0056243	0.00280899	0.00139665	0.0285088
977	18S 64	0.0019802	0.0011236	0.00835655	0.0013947	0.0194805
978	18S 65	0.00492611	0.00447427	0.00828729	0.00278164	0.0179775
979	18S 66	0.00294695	0.00223214	0.00275482	0.00277393	0.0179775
980	18S 67	0.00585938	0.00444444	0.00547945	0.00276625	0.0179775
981	18S 68	0.00097561	0.00662252	0.00544959	0	0.0167364
982	18S 69	0.00291829	0.0043956	0	0.00138122	0.0167488
983	18S 70	0.012488	0.0130152	0.0265252	0.0904523	0.0182342
984	18S 71	0.0132701	0.0139037	0.0233161	0.0744186	0.0182342
985	18S 72	0.0240518	0.0250261	0.0608273	0.0227273	0.0182342
986	18S 73	0.029623	0.049554	0.0743243	0.0222222	0.0182342
987	18S 74	0.0371651	0.066605	0.0691824	0.0217391	0.0182342
988	18S 75	0.0669355	0.123277	0.1	0.026455	0.016129
989	18S 76	0.076006	0.0920471	0.101695	0.0425532	0.0165975
990	18S 77	0.00592593	0.00875912	0.00673401	0.00403633	0.0200401
991	18S 78	0.0131579	0.0101156	0.013289	0.00502008	0.0200401
992	18S 79	0	0.00288184	0.00165837	0.00200401	0.0200401
993	18S 80	0.00581395	0.00287356	0.00985222	0.00893744	0.0200401
994	18S 81	0.0150322	0.00854701	0.0161551	0.00198216	0.0200401
995	18S 82	0.00498575	0.0021322	0	0.000990099	0.0183299
996	18S 83	0.0140449	0.020195	0.0205696	0.00197628	0.0183299
997	18S 84	0.00628053	0.00622837	0.0125	0.00295567	0.0183299
998	18S 85	0.00139373	0.00207182	0.00466563	0.000984252	0.0183299
999	18S 86	0.0123882	0.010929	0.0153139	0.00392157	0.0174419
1000	18S 87	0.000687758	0.000682594	0.00457317	0.000979432	0.0174419
1001	18S 88	0.00137363	0.000682128	0	0	0.0197239
1002	18S 89	0	0.00136333	0.00152207	0.000978474	0.0197239
1003	18S 90	0.000686342	0.00136147	0	0.00195312	0.0210325
1004	18S 91	0.0181941	0.0101078	0.0179372	0.00389105	0.0327553
1005	18S 92	0.000673401	0.0047043	0.00446429	0	0.0335821
1006	18S 93	0.013289	0.0171731	0.0132159	0.000971817	0.0335821
1007	18S 94	0.00397088	0.00197759	0.00438596	0	0.0371681
1008	18S 95	0	0.00131666	0.00145985	0.000970874	0.0371681
1009	18S 96	0.00132188	0.000659631	0	0.00193798	0.0371681
1010	18S 97	0.00197889	0.000659196	0	0	0.0433387
1011	18S 98	0.00197759	0.00197498	0.00724638	0.000968054	0.0433387
1012	18S 99	0.00328731	0.00263331	0.00862069	0.00385728	0.0598389
1013	18S 100	0.194386	0.15221	0.2	0.32443	0.0598389
1014	18S 101	0.101808	0.0574895	0.0744681	0.0524691	0.0598389
1015	18S 102	0.0131455	0.0216718	0.0238837	0.0252708	0.0598389
1016	18S 103	0.0097629	0.00920245	0.0112936	0.0130641	0.0598389
1017	18S 104	0.00278164	0.00559512	0.00612245	0.00472813	0.039818
1018	18S 105	0.00323475	0.00405269	0.00507614	0.000590667	0.0363825
1019	18S 106	0.00184502	0.0030303	0.0010142	0.00117994	0.0376238
1020	18S 107	0.00321839	0.00201613	0.00303337	0.00235433	0.0376238
1021	18S 108	0.0113636	0.00451581	0.0149402	0.0545353	0.0423892
1022	18S 109	0.00226757	0.0025025	0.00396825	0.00553403	0.060207
1023	18S 110	0.00316456	0.001	0.0019802	0.00220872	0.0755712
1024	18S 111	0.000451875	0.00149775	0.00098912	0.00220386	0.0755712
1025	18S 112	0.0124944	0.00890648	0.0146199	0.0356004	0.0755712
1026	18S 113	0.00267023	0.00296004	0.0038835	0.00264971	0.0755712
1027	18S 114	0.000889284	0	0	0.000529661	0.0755712
1028	18S 115	0.00266075	0.0029513	0.00193798	0.00421941	0.0755483
1029	18S 116	0.00132861	0.000982801	0.003861	0.000527148	0.0594512
1030	18S 117	0.00220946	0.00245098	0.00096432	0.00105319	0.0511663
1031	18S 118	0.00483729	0.00341964	0.00192493	0.00419507	0.0288462
1032	18S 119	0.0069869	0.0115886	0.0132953	0.027537	0.0182615
1033	18S 120	0.00348129	0.00192771	0.0037843	0.00305033	0.0124666
1034	18S 121	0.00130378	0.00240385	0.00377003	0.00202943	0.0124666
1035	18S 122	0	0.000480538	0	0.000507099	0.0112439
1036	18S 123	0	0	0.00094162	0.00202429	0.0112439
1037	18S 124	0.00733391	0.00715649	0.00840336	0.00403226	0.0112439
1038	18S 125	0.00215239	0.00522069	0.00372093	0.00301508	0.0112439
1039	18S 126	0.003432	0.00236742	0.00278293	0.00300601	0.0111498
1040	18S 127	0.00128535	0.00141844	0	0.000500751	0.0111498
1041	18S 128	0.000856164	0.00047259	0	0.0005005	0.0103663
1042	18S 129	0.0017094	0.00141576	0	0	0.0103663
1043	18S 130	0.000427168	0.000942951	0.000926784	0.00149925	0.0103663
1044	18S 131	0.00255646	0.00422535	0.00185014	0.00298954	0.0103663
1045	18S 132	0.0117895	0.0674256	0.0458959	0	0.0115098
1046	18S 133	0.0388507	0.149348	0.101507	0.00347567	0.0115098
1047	18S 134	0.028313	0.0631542	0.044697	0.000992064	0.0115098
1048	18S 135	0.142905	0.264185	0.217546	0.0481586	0.0115098
1049	18S 136	0.0106702	0.0198792	0.0180442	0.00329412	0.0115098
1050	18S 137	0.00431607	0.00425958	0.00463499	0.000940292	0.00983204
1051	18S 138	0.00462657	0.00274863	0.00918484	0.00328022	0.00983204
1052	18S 139	0.00164962	0.00149701	0.00114679	0.00466418	0.00983204
1053	18S 140	0.0042707	0.00224048	0.00626781	0.0124367	0.00929669
1054	18S 141	0.00131234	0.00024888	0	0.000460405	0.010012
1055	18S 142	0.00327011	0.000497512	0	0.00137931	0.010012
1056	18S 143	0.00130634	0.000745712	0.00170648	0	0.010012
1057	18S 144	0.00130463	0.000745156	0.00509338	0.00137741	0.010012
1058	18S 145	0.0204473	0.00984737	0.0227021	0.0298574	0.0108485
1059	18S 146	0.00603366	0.00270071	0.00769231	0.00664011	0.0108485
1060	18S 147	0.00442618	0.000736016	0.00437637	0.00308914	0.0108485
1061	18S 148	0.00378072	0.00220642	0.00760043	0.00220264	0.0108485
1062	18S 149	0.000944287	0	0.0010846	0.000880282	0.013468
1063	18S 150	0.000943396	0	0	0.000439947	0.013468
1064	18S 151	0.000942507	0	0.00162426	0	0.013468
1065	18S 152	0.00094162	0.000245158	0	0	0.013468
1066	18S 153	0.00312891	0.000734934	0.00162162	0	0.013468
1067	18S 154	0.00249688	0.000734394	0.0021575	0.000439754	0.0104517
1068	18S 155	0.00774234	0.00487211	0.0106724	0.0172861	0.0104517
1069	18S 156	0.00154607	0.00145985	0.00212993	0.0038743	0.00976342
1070	18S 157	0.0143249	0.0122626	0.0198433	0.00853971	0.00953778
1071	18S 158	0.00666465	0.00741449	0.0103466	0.00171086	0.00953778
1072	18S 159	0.00512357	0.00924171	0.0147808	0.000854701	0.00941006
1073	18S 160	0.00420168	0.00495283	0.00507357	0.00594985	0.00941006
1074	18S 161	0.00299222	0.00352526	0.00353893	0.0067539	0.00838498
1075	18S 162	0.00506103	0.00467836	0.0114943	0.016196	0.00857449
1076	18S 163	0.00118941	0.000701262	0.00199501	0.00041511	0.0120397
1077	18S 164	0.00207715	0.0027972	0.00298359	0.00207125	0.0135323
1078	18S 165	0.00148148	0.00116414	0.000993542	0.000414079	0.0135889
1079	18S 166	0.00177462	0.000697999	0.00198314	0.000413907	0.0135889
1080	18S 167	0.00500294	0.00301624	0.00640394	0.0102417	0.0135889
1081	18S 168	0.00439496	0.00277842	0.00392542	0.00245198	0.0135889
1082	18S 169	0.0386242	0.0279657	0.0450493	0.00489197	0.0135889
1083	18S 170	0.00699888	0.00649787	0.009298	0.00325071	0.0126095
1084	18S 171	0.0197585	0.0167438	0.0328237	0.0431571	0.0125979
1085	18S 172	0.00137024	0.00176018	0.00358423	0.00502901	0.0125979
1086	18S 173	0.0447644	0.0189942	0.0574324	0.235885	0.011375
1087	18S 174	0.00520833	0.0030127	0.00587741	0.0131272	0.0115101
1088	18S 175	0.00337399	0.0004302	0.00251256	0.00232829	0.012682
1089	18S 176	0.0023304	0.000644884	0.00083682	0.00116279	0.0142989
1090	18S 177	0.00540819	0.00385439	0.00582363	0.00462963	0.0142989
1091	18S 178	0.0383853	0.0363186	0.0267206	0.0286678	0.0146602
1092	18S 179	0.0177572	0.0214055	0.0202301	0.00697739	0.0146602
1093	18S 180	0.00963623	0.0101939	0.00591716	0.0019504	0.0146602
1094	18S 181	0.00336215	0.00279385	0.00314837	0.000557103	0.0146602
1095	18S 182	0.00478011	0.00318281	0.00313849	0.000278474	0.0146602
1096	18S 183	0.00167025	0.000993641	0	0	0.0130454
1097	18S 184	0.00023855	0.000198689	0.000392157	0	0.0119363
1098	18S 185	0.00119133	0.000198649	0.00156617	0.000834725	0.0119363
1099	18S 186	0.000952154	0.000397141	0.000782473	0	0.0119363
1100	18S 187	0.000475851	0	0	0	0.0119363
1101	18S 188	0.00166271	0.000595356	0.000391083	0.000278164	0.0118594
1102	18S 189	0.000237473	0.000396747	0.00039093	0	0.0108979
1103	18S 190	0.000474721	0.000396589	0.000390778	0	0.00828609
1104	18S 191	0.0174907	0.0188716	0.0243995	0.0172225	0.00899621
1105	18S 192	0.00947101	0.00906286	0.00906687	0.0081367	0.0114895
1106	18S 193	0.000923788	0.000964692	0.00151	0.00135722	0.0114895
1107	18S 194	0.000922935	0.000385802	0.000754432	0.00081389	0.0114895
1108	18S 195	0.00230468	0.000965437	0.000754717	0.000271518	0.0114895
1109	18S 196	0.00115128	0.00135161	0.00188537	0.000271665	0.0114895
1110	18S 197	0.00183866	0.00134979	0.00150602	0.000543036	0.00859951
1111	18S 198	0.00412182	0.00498945	0.00337711	0.00271003	0.00940799
1112	18S 199	0.00182857	0.00134151	0.00149869	0.00108284	0.00956556
1113	18S 200	0.00137018	0.000575043	0.000749064	0	0.00956556
1114	18S 201	0.000912617	0.000574713	0.00112233	0	0.0101642
1115	18S 202	0.00499432	0.00305577	0.00705795	0.00431849	0.0102201
1116	18S 203	0.000907235	0.0011446	0.00111317	0.000809062	0.0146825
1117	18S 204	0.00316599	0.00114329	0.00185254	0.00161551	0.0168892
1118	18S 205	0.00338066	0.00190186	0.00479351	0.00295381	0.017114
1119	18S 206	0.0269737	0.0168287	0.0386388	0.0936968	0.017114
1120	18S 207	0.00414938	0.00186637	0.00423579	0.00652805	0.017114
1121	18S 208	0.00304812	0.0020488	0.00246479	0.00120744	0.017114
1122	18S 209	0.00195567	0.00204461	0.0049054	0.00288948	0.017114
1123	18S 210	0.0122344	0.0090256	0.0134808	0.0350836	0.0169683
1124	18S 211	0.00171416	0.00128771	0.00344471	0.00324224	0.0167577
1125	18S 212	0.00277778	0.00128606	0.0024055	0.0013876	0.0115888
1126	18S 213	0.00679117	0.00783813	0.0118845	0.0172727	0.010491
1127	18S 214	0.00485744	0.00290803	0.00405817	0.00497512	0.010491
1128	18S 215	0.0231071	0.0122083	0.025379	0.0229783	0.00857741
1129	18S 216	0.0106144	0.00836746	0.0203423	0.020982	0.00815388
1130	18S 217	0.0211788	0.0136962	0.0202468	0.00409306	0.00815388
1131	18S 218	0.00635299	0.00593472	0.00753532	0.00322096	0.00850159
1132	18S 219	0.00474215	0.00226402	0.00406504	0.0010725	0.0102329
1133	18S 220	0.00334777	0.00243224	0.00497822	0.00235395	0.0106876
1134	18S 221	0.00372768	0.00380755	0.00556931	0.00298699	0.0106876
1135	18S 222	0.00701344	0.0041365	0.00553846	0.0040374	0.0106876
1136	18S 223	0.00484684	0.00326404	0.00459418	0.00212044	0.0106876
1137	18S 224	0.0107403	0.00682477	0.0159735	0.0678	0.0106876
1138	18S 225	0.00723534	0.00323129	0.00896057	0.0302856	0.0103907
1139	18S 226	0.00830816	0.00322088	0.0074118	0.00210406	0.00992131
1140	18S 227	0.00113165	0.000677622	0.000888626	0.000191241	0.00992131
1141	18S 228	0.000565504	0.000677163	0.000296121	0.000191205	0.00992131
1142	18S 229	0.00281955	0.000338467	0.000887574	0.000382263	0.0100167
1143	18S 230	0.000751315	0.000169205	0.000886787	0	0.0119284
1144	18S 231	0.000563169	0.000338295	0.00118099	0	0.0119284
1145	18S 232	0.00187371	0.00168862	0.000884956	0.000573066	0.0119284
1146	18S 233	0.00112317	0	0.000589623	0.000190985	0.0119284
1147	18S 234	0.000935104	0.000506329	0.00117786	0.000381825	0.0121019
1148	18S 235	0.000186986	0.000506073	0.000294377	0	0.014772
1149	18S 236	0.00502326	0.00185216	0.0049795	0.00209564	0.025601
1150	18S 237	0.000743633	0.000336644	0	0.00038088	0.0327869
1151	18S 238	0.00811359	0.00419041	0.00986079	0.00322703	0.0327869
1152	18S 239	0.010582	0.00732113	0.00634006	0.00321665	0.0327869
1153	18S 240	0.00742485	0.00430749	0.0125213	0.00132275	0.0327869
1154	18S 241	0.00843958	0.00772645	0.00565931	0.00150943	0.0327869
1155	18S 242	0.00107681	0.000986193	0.00141323	0	0.0256334
1156	18S 243	0.000358873	0.000492854	0.000564972	0	0.0170789
1157	18S 244	0.00411008	0.00327493	0.00729108	0.00131951	0.0162743
1158	18S 245	0.00107105	0.000981515	0.00167973	0	0.0146299
1159	18S 246	0.0010699	0.000490517	0.000559597	0	0.0124134
1160	18S 247	0.00620237	0.00455729	0.0107944	0.00319429	0.0110858
1161	18S 248	0.00141568	0.00178716	0.0019337	0.000751033	0.0107945
1162	18S 249	0.00633023	0.00420644	0.00631348	0.00262172	0.0106793
1163	18S 250	0.00210563	0.00113122	0.00219118	0.00540138	0.0104568
1164	18S 251	0.0445935	0.0282663	0.0842739	0.216433	0.0107231
1165	18S 252	0.0155141	0.0122538	0.0230336	0.0294618	0.0107231
1166	18S 253	0.00867147	0.00370885	0.00826245	0.013691	0.0107231
1167	18S 254	0.0223928	0.0150685	0.0174308	0.00361915	0.0109802
1168	18S 255	0.00604134	0.00379075	0.00546189	0.00208362	0.0127119
1169	18S 256	0.0111618	0.00737508	0.0105733	0.0153194	0.0135593
1170	18S 257	0.00996109	0.0101311	0.00954154	0.00272814	0.0146794
1171	18S 258	0.00170914	0.00133909	0.00255339	0.000953938	0.0146794
1172	18S 259	0.00494743	0.00311573	0.00347062	0.00136129	0.0146794
1173	18S 260	0.00538213	0.00325348	0.00391795	0.00122366	0.0146794
1174	18S 261	0.00168867	0.0022137	0.00161068	0.000407719	0.0146794
1175	18S 262	0.00275566	0.00206186	0.00480879	0.000950441	0.0128766
1176	18S 263	0.000611995	0.000588755	0.000915122	0.000135759	0.0102295
1177	18S 264	0.00350663	0.00220297	0.00251027	0.00216743	0.0102295
1178	18S 265	0.00197809	0.000880411	0.000456204	0.000541565	0.0108669
1179	18S 266	0.00469484	0.00423729	0.00408905	0.000811688	0.0136919
1180	18S 267	0.00362155	0.00218691	0.00271862	0.000946074	0.0151844
1181	18S 268	0.000904568	0.000291503	0.000226501	0.000270234	0.0151844
1182	18S 269	0.00105422	0.000437063	0.00180873	0.000135099	0.0151844
1183	18S 270	0.000301114	0.000727908	0	0.00202238	0.0151844
1184	18S 271	0.00285242	0.00101803	0.00135471	0.00722795	0.0151844
1185	18S 272	0.000150105	0.00043611	0.000902323	0.000535117	0.0125622
1186	18S 273	0.00134912	0.000290655	0.000450958	0.000534831	0.00996914
1187	18S 274	0.000898607	0.000145307	0.000225428	0.00013369	0.00981079
1188	18S 275	0	0.000145285	0.000450653	0	0.00981079
1189	18S 276	0.00119671	0.0007259	0.00224871	0.000267308	0.00981079
1190	18S 277	0.00119528	0.00318564	0.00559284	0.00106852	0.00981079
1191	18S 278	0.000746826	0.00187943	0.00156425	0.000133583	0.0104248
1192	18S 279	0.00653304	0.00317186	0.00489651	0.00399361	0.0132778
1193	18S 280	0.00325588	0.00330507	0.00222074	0.00146218	0.0132778
1194	18S 281	0.000591628	0.000287315	0.00110914	0.00053142	0.0132778
1195	18S 282	0.00132939	0.00100459	0.00110791	0.000132837	0.0132778
1196	18S 283	0.00147493	0.000860338	0.000885544	0.000663746	0.0132778
1197	18S 284	0.0122378	0.00838902	0.0118136	0.00580705	0.0128421
1198	18S 285	0.00305011	0.00170334	0.00261837	0.000791244	0.012289
1199	18S 286	0.000725689	0.000283809	0.000436205	0	0.012289
1200	18S 287	0.000145117	0.000283728	0.00065388	0.000263678	0.012289
1201	18S 288	0.00159374	0.00240589	0.00195822	0.00131666	0.012289
1202	18S 289	0.00101317	0.000424388	0.000434972	0.000131648	0.0113819
1203	18S 290	0.00057862	0.000848296	0.000652174	0.000131631	0.011371
1204	18S 291	0.000722752	0.000141363	0.000651749	0.000263193	0.00983747
1205	18S 292	0.000866551	0.000847458	0.00108507	0.000394633	0.00707851
1206	18S 293	0.000577451	0.00126975	0.00194932	0.000394477	0.00534074
1207	18S 294	0.000577117	0.00070492	0.00129786	0.00262295	0.00487031
1208	18S 295	0.0195219	0.0115663	0.0298006	0.105572	0.00487031
1209	18S 296	0.00211745	0.00166945	0.003555	0.00849035	0.00487031
1210	18S 297	0.00155039	0.00208247	0.0010445	0.000929584	0.00487031
1211	18S 298	0.00379107	0.00332088	0.0047817	0.0243737	0.00442012
1212	18S 299	0.00447302	0.00317241	0.00763359	0.0254116	0.00442012
1213	18S 300	0.000977517	0.000964719	0.00288007	0.00275452	0.00442012
1214	18S 301	0.00347899	0.00206299	0.00143796	0.0005506	0.00555899
1215	18S 302	0.00083426	0.000824516	0.0014359	0.000330251	0.0071972
1216	18S 303	0.000694734	0	0	0	0.0071972
1217	18S 304	0.000277816	0.000274763	0.00122926	0.000220119	0.0071972
1218	18S 305	0.000277739	0.000137363	0.000204834	0.00022007	0.0071972
1219	18S 306	0.00013885	0.000137344	0	0	0.0071972
1220	18S 307	0.000277624	0	0	0	0.00613121
1221	18S 308	0.000138793	0	0	0	0.00573183
1222	18S 309	0	0	0	0.000220022	0.00573183
1223	18S 310	0.000138773	0	0.000204792	0.000219974	0.00506073
1224	18S 311	0.000831947	0.000137325	0.00102291	0.000329852	0.00430504
1225	18S 312	0.00235164	0.00246575	0.00326264	0.00470562	0.00418184
1226	18S 313	0.00372208	0.00136836	0.00406339	0.00120284	0.00402253
1227	18S 314	0.00220538	0.00178302	0.00203335	0.00762278	0.00402253
1228	18S 315	0.00534686	0.00369004	0.0074672	0.0271215	0.00402253
1229	18S 316	0.00450943	0.00340878	0.00601805	0.00222199	0.00409527
1230	18S 317	0.000819224	0.000272702	0.0010022	0.000317393	0.00409527
1231	18S 318	0.00109111	0.00108977	0.0010012	0.000317292	0.00540108
1232	18S 319	0.000681477	0.000272368	0.00040032	0	0.00540108
1233	18S 320	0.00217598	0.00190295	0.00219692	0.000422922	0.00540108
1234	18S 321	0.000271924	0.000135906	0.000399281	0.000633981	0.00570081
1235	18S 322	0.000135943	0	0	0.000528039	0.00570081
1236	18S 323	0.000543478	0.000271739	0.000997208	0.000211171	0.00570081
1237	18S 324	0.000271665	0.000135851	0.000199402	0	0.00570081
1238	18S 325	0.000271592	0.000135833	0	0.000105574	0.00570081
1239	18S 326	0.000271518	0	0.000199362	0	0.00489908
1240	18S 327	0.000542741	0.000407332	0.000398565	0.000105563	0.00489716
1241	18S 328	0.000813449	0.000814001	0.000398406	0.000316589	0.00431796
1242	18S 329	0.000812788	0.000542373	0.00119379	0.000316489	0.00431796
1243	18S 330	0.000135446	0.000135575	0	0	0.006779
1244	18S 331	0.00377817	0.0014891	0.00257988	0.000421852	0.007912
1245	18S 332	0.00040464	0.000541199	0.000595002	0.000421674	0.007912
1246	18S 333	0.00134698	0.000676041	0.00237436	0.00126342	0.007912
1247	18S 334	0.000269324	0.000540541	0	0.000105274	0.007912
1248	18S 335	0.000269251	0.000135117	0.00039557	0.000105263	0.007912
1249	18S 336	0.000538213	0.000135099	0	0.000105252	0.00727969
1250	18S 337	0.000672314	0.000270124	0.000593003	0.00021046	0.00687416
1251	18S 338	0.000671862	0	0.000790045	0.000105219	0.00549972
1252	18S 339	0	0.000270051	0.000394867	0.000105208	0.00491277
1253	18S 340	0.000134354	0	0	0	0.00491277
1254	18S 341	0	0.000944287	0.00059195	0.000420654	0.00491277
1255	18S 342	0	0.00013488	0.000591599	0	0.00491277
1256	18S 343	0	0.00013488	0	0	0.00491277
1257	18S 344	0.00147592	0.000943269	0.001772	0.00262247	0.00468968
1258	18S 345	0	0	0	0.000209754	0.00468968
1259	18S 346	0.000268276	0.000404149	0.000196928	0.00020971	0.00468968
1260	18S 347	0.000670241	0.000403986	0.000393701	0.000104844	0.00447405
1261	18S 348	0.001606	0.000941746	0.00294406	0.000628667	0.00414856
1262	18S 349	0.000535045	0.000672224	0.00117624	0.000104767	0.00410637
1263	18S 350	0.00333289	0.00053749	0.00117486	0.00125562	0.00447732
1264	18S 351	0.00543622	0.00334851	0.00969556	0.0363013	0.00455647
1265	18S 352	0.0125687	0.00691673	0.0182753	0.0580357	0.00455647
1266	18S 353	0.00248171	0.0017262	0.0022792	0.00538498	0.00462651
1267	18S 354	0.000652656	0.000265498	0.000948767	0.000472144	0.00462651
1268	18S 355	0.00143379	0.00106087	0.000948047	0.000849137	0.00462651
1269	18S 356	0.000130327	0	0.000379075	0.000188661	0.00462651
1270	18S 357	0.000521037	0.000132608	0.000568289	0.000282912	0.00462651
1271	18S 358	0.000780945	0.000662778	0.00151343	0.00169476	0.00364473
1272	18S 359	0.00143155	0.000928382	0.00151172	0.00300639	0.00402783
1273	18S 360	0.00130856	0.000801817	0.00114003	0.000661688	0.00455042
1274	18S 361	0	0	0.000190078	9.45269e-05	0.00491803
1275	18S 362	0.000393288	0.000401714	0.000571102	0.00264151	0.00491803
1276	18S 363	0.000820232	0.000417304	0.000394711	0.000291375	0.00491803
1277	18S 364	0.000282885	0.000287274	0.000609756	0.00030009	0.00491803
1278	18S 365	0.00156717	0.000727696	0.00143266	0.000201511	0.00491803
1279	18S 366	0.00189311	0.00178704	0.00167329	0.00122838	0.00404079
1280	18S 367	0.00234398	0.00104665	0.00084246	0.000205931	0.00404079
1281	18S 368	0.000881834	0.00060051	0.000634249	0.000206718	0.00351748
1282	18S 369	0.00106173	0.00278465	0.0004363	0.0022234	0.0046895
1283	18S 370	0.00380058	0.00711744	0.00369997	0.000705418	0.00579183
1284	18S 371	0.00226372	0.00335264	0.00218723	0.000494805	0.00612502
1285	18S 372	0.00190295	0.00106195	0.000498008	0	0.00761509
1286	18S 373	0.00133023	0.00111152	0.00205973	0.000367715	0.0097629
1287	18S 374	0.0312809	0.0222305	0.0200514	0.00444527	0.0097629
1288	18S 375	0.00784314	0.00332963	0.00205444	0.000740604	0.0097629
1289	18S 376	0.000653808	0.000740467	0	0.00055535	0.0097629
1290	18S 377	0.000327225	0.000742391	0.000514668	0.000741153	0.0097629
1291	18S 378	0.00163452	0.00296516	0.00256805	0.000371058	0.0101116
1292	18S 379	0.000982962	0	0.000514139	0.000185701	0.0105857
1293	18S 380	0	0	0	0.000189072	0.0105857
1294	18S 381	0.00100976	0.000384615	0	0.000568828	0.0105857
1295	18S 382	0.000673401	0.000769527	0.000527983	0.00132626	0.0105857
1296	18S 383	0.000672947	0.000384615	0	0.00018943	0.0105857
1297	18S 384	0	0	0.00105485	0.000189394	0.00997862
1298	18S 385	0	0.00077101	0.000528262	0	0.00907188
1299	18S 386	0	0.000385356	0.000527983	0.000189789	0.00664801
1300	18S 387	0.00101146	0.00153905	0.000527704	0.000189753	0.00664801
1301	18S 388	0.000673854	0.000384615	0.0010543	0	0.00550206
1302	18S 389	0.00101078	0	0	0	0.00562463
1303	18S 390	0.000339559	0.000775494	0	0	0.00596073
1304	18S 391	0.000695652	0.0011839	0.000542005	0.000387372	0.00596073
1305	18S 392	0.0010442	0	0	0.000194062	0.00670667
1306	18S 393	0	0	0	0	0.00672805
1307	18S 394	0	0.000396354	0.000542299	0	0.00702494
1308	18S 395	0	0.000792393	0	0.000194137	0.00732473
1309	18S 396	0.000696136	0.000792079	0	0	0.00776288
1310	18S 397	0.0013913	0.000792393	0.000543478	0	0.00776288
1311	18S 398	0.000695169	0.0015829	0.00162778	0.000582411	0.00776288
1312	18S 399	0.000694686	0.00039557	0.00162514	0.000969744	0.00855205
1313	18S 400	0.000347343	0.0011853	0	0.000193911	0.00855205
1314	18S 401	0.00104094	0.002365	0.0027027	0.000193874	0.00855205
1315	18S 402	0.000346861	0	0.000540249	0	0.00855205
1316	18S 403	0.000346741	0.0011811	0.00161812	0.000193836	0.00855205
1317	18S 404	0.00034662	0.000393546	0.000539084	0	0.00690369
1318	18S 405	0	0.000393391	0.000538793	0	0.00687758
1319	18S 406	0.000692761	0	0.000538503	0.000193798	0.00651577
1320	18S 407	0.0013836	0.000786163	0.00107585	0.000193798	0.00608872
1321	18S 408	0	0.000785546	0	0	0.00554017
1322	18S 409	0.000345781	0	0	0.000968054	0.00636653
1323	18S 410	0.00138122	0.000784929	0.000537924	0.0030888	0.00995475
1324	18S 411	0.000345185	0.000785238	0.00161204	0.000385951	0.0143627
1325	18S 412	0.00137931	0.0027408	0.00107354	0.00575816	0.0185267
1326	18S 413	0.00137788	0.00156372	0	0.000575484	0.0185267
1327	18S 414	0.000344353	0	0.000536481	0	0.0185267
1328	18S 415	0.00137599	0	0	0.000766724	0.0185267
1329	18S 416	0.000687758	0.00117233	0.000536769	0.00495994	0.0185267
1330	18S 417	0.00309491	0.00389864	0.00321716	0.000764088	0.0125704
1331	18S 418	0.000688231	0.000780031	0.00107239	0.000382336	0.0108696
1332	18S 419	0.00137457	0.00155763	0.00107181	0.000191132	0.0108696
1333	18S 420	0.003771	0.00272374	0.00213904	0.000382336	0.00941873
1334	18S 421	0.0977047	0.0949523	0.0942205	0.0299201	0.00722892
1335	18S 422	0.00892033	0.00561601	0.0110524	0.00370508	0.00722892
1336	18S 423	0.00215054	0.00140252	0.00288462	0.000556483	0.00794071
1337	18S 424	0.00275989	0.000701508	0.0033541	0.00222222	0.00875796
1338	18S 425	0.00367422	0.001755	0.00144023	0.00736106	0.00875796
1339	18S 426	0.000306279	0.000351247	0	0.000184027	0.00875796
1340	18S 427	0.000932546	0.00106838	0.00097704	0.000747803	0.00875796
1341	18S 428	0.00555919	0.00113679	0.0041301	0.0114253	0.00881057
1342	18S 429	0.00130762	0.000760167	0.000516262	0.00154769	0.0102908
1343	18S 430	0.00130591	0.000380084	0	0.00096637	0.0105497
1344	18S 431	0.000656599	0.000380952	0.000516796	0.000193611	0.0118035
1345	18S 432	0.00427491	0.00191865	0.00362319	0.00174689	0.0136203
1346	18S 433	0.00133467	0.00155581	0.00106101	0.000589854	0.0136203
1347	18S 434	0.00233256	0.00155642	0.00212089	0.000786163	0.0136203
1348	18S 435	0.00212314	0.00167856	0.00402068	0.00146444	0.0136203
1349	18S 436	0.0475299	0.0509156	0.0519159	0.04438	0.0136203
1350	18S 437	0.0687237	0.0747819	0.0587199	0.0174624	0.0124309
1351	18S 438	0.0873202	0.10004	0.108928	0.00583431	0.00891317
1352	18S 439	0.0109029	0.00970874	0.0114679	0.00119076	0.00883392
1353	18S 440	0.00102881	0.002443	0.0023108	0.000240674	0.0111176
1354	18S 441	0.00376068	0.00527597	0.00288184	0.00383785	0.0126874
1355	18S 442	0.00102459	0	0.000576369	0	0.0148317
1356	18S 443	0.000682594	0.000405844	0.00115141	0.000239866	0.0148317
1357	18S 444	0.0020436	0.0036393	0.00172414	0.0064347	0.0148317
1358	18S 445	0.000340484	0.00121163	0	0.000476417	0.0148317
1359	18S 446	0.00169952	0.00281917	0.00343643	0	0.0148317
1360	18S 447	0.00135777	0.00120676	0.00057241	0	0.0125714
1361	18S 448	0.000678426	0.000803859	0.000572082	0	0.0106264
1362	18S 449	0.000677966	0.000803213	0	0.000951928	0.0106264
1363	18S 450	0.00169205	0.00200401	0.00738217	0.00284765	0.0106264
1364	18S 451	0.000338295	0.000400641	0.00283126	0.00118511	0.0106264
1365	18S 452	0.00971524	0.00676482	0.00842224	0.00260047	0.00890373
1366	18S 453	0.00100402	0.000397772	0	0.00047259	0.0100604
1367	18S 454	0.00233723	0.00356718	0.0022409	0.00141576	0.0118901
1368	18S 455	0.00166667	0.000792079	0.00390625	0.00141376	0.0118901
1369	18S 456	0.00924703	0.00786164	0.0104914	0.024592	0.0118901
1370	18S 457	0.00131926	0.00156986	0.00439802	0.000689022	0.0118901
1371	18S 458	0.00131752	0.000784621	0	0.000229674	0.0118901
1372	18S 459	0.000329272	0	0.00164654	0.000229621	0.0108216
1373	18S 460	0.000987167	0.00195925	0.000548546	0.000229674	0.0103298
1374	18S 461	0.00131449	0.000391696	0	0.000459137	0.0103298
1375	18S 462	0.000657246	0	0.000548246	0.000229779	0.0103298
1376	18S 463	0.00165892	0.0015804	0.00110314	0.000233918	0.00974026
1377	18S 464	0.000833333	0.000491159	0	0	0.00974026
1378	18S 465	0	0	0	0	0.00974026
1379	18S 466	0.00094162	0.00109951	0.00329218	0	0.00974026
1380	18S 467	0.000982801	0.000571755	0	0.00047081	0.00795907
1381	18S 468	0.0035	0.0057971	0.004363	0.0019861	0.00879765
1382	18S 469	0.0005	0.0023175	0.00261097	0.0122609	0.00879765
1383	18S 470	0.00799201	0.00233645	0.00782609	0.0273304	0.00879765
1384	18S 471	0.003998	0.00641774	0.00348432	0.0024558	0.00879765
1385	18S 472	0.00398208	0.00580383	0.00347222	0.00489237	0.00879765
1386	18S 473	0.00692042	0.0120413	0.00775194	0.00390054	0.00686892
1387	18S 474	0.00247525	0.000575043	0	0	0.00686892
1388	18S 475	0.00492611	0.00515169	0.00431034	0.000492854	0.00686611
1389	18S 476	0.000492854	0.000573066	0.00257954	0.000493097	0.00668338
1390	18S 477	0.000985222	0.000573066	0.000859107	0.00344149	0.00668338
1391	18S 478	0.00246063	0.00286041	0.00257069	0.000491642	0.00668338
1392	18S 479	0	0	0	0	0.00668338
1393	18S 480	0.000491884	0.00114286	0	0	0.00633641
1394	18S 481	0.000982801	0.0022805	0.000856164	0.00147275	0.00630011
1395	18S 482	0.00147203	0.00227531	0	0.000490677	0.00730748
1396	18S 483	0.000980392	0.00170358	0.0017094	0.00146987	0.00842697
1397	18S 484	0.000489956	0	0	0.000489716	0.00842697
1398	18S 485	0.00244379	0.00113443	0.00170648	0.00535801	0.00842697
1399	18S 486	0.000976562	0.00113314	0	0.000486855	0.00842697
1400	18S 487	0.000488043	0.000566251	0	0	0.00842697
1401	18S 488	0.000488281	0.000565931	0	0.000486618	0.00716253
1402	18S 489	0	0.00113058	0	0	0.00940266
1403	18S 490	0	0	0	0	0.00940266
1404	18S 491	0.00048852	0	0	0	0.00940266
1405	18S 492	0.0125604	0.0134003	0.00765306	0.00583374	0.00940266
1406	18S 493	0.00197044	0.00344234	0.00347524	0	0.00940266
1407	18S 494	0.00344149	0.00570451	0.00260417	0.00199302	0.00721421
1408	18S 495	0.000494315	0.0017301	0	0.000505561	0.00684541
1409	18S 496	0.000988631	0.0011534	0.000882613	0	0.00684541
1410	18S 497	0.000987654	0.00115207	0	0	0.00631458
1411	18S 498	0.000493583	0.00115075	0	0	0.00710771
1412	18S 499	0.00393314	0.00286862	0.00176211	0.00101215	0.00710771
1413	18S 500	0.0097371	0.00683761	0.00525855	0.00101112	0.00710771
1414	18S 501	0.0129745	0.00959368	0.00349345	0.0010101	0.00710771
1415	18S 502	0	0.000564016	0	0	0.00710771
1416	18S 503	0.00143954	0.00168919	0	0	0.00665484
1417	18S 504	0.00239349	0.00112486	0.0008726	0.00100908	0.00665484
1418	18S 505	0.000478469	0.0011236	0	0	0.00620843
1419	18S 506	0.0047619	0.00669643	0.00607112	0.0020141	0.00666667
1420	18S 507	0.000475964	0.000557725	0.000866551	0	0.00886427
1421	18S 508	0.00142586	0.000557414	0	0	0.00953619
1422	18S 509	0	0.00111359	0	0	0.0131119
1423	18S 510	0.00142383	0.00166759	0	0	0.0131119
1424	18S 511	0.0014218	0.00111049	0.000865801	0	0.0131119
1425	18S 512	0.00094697	0.00166297	0	0.000503271	0.0131119
1426	18S 513	0	0.000554017	0	0	0.0131119
1427	18S 514	0.00141844	0.00110681	0	0	0.0109075
1428	18S 515	0.00141643	0.00110558	0	0	0.00852515
1429	18S 516	0.000471921	0.00220629	0	0	0.00755034
1430	18S 517	0.00188413	0	0	0.000503018	0.00802139
1431	18S 518	0.00748713	0.0147139	0.00603448	0.0173182	0.00802139
1432	18S 519	0.0088208	0.00703463	0.00172117	0.0288323	0.00802139
1433	18S 520	0.00139082	0.00162075	0.00513699	0.0174693	0.0106209
1434	18S 521	0.00369515	0.00590763	0.000855432	0.00188501	0.012945
1435	18S 522	0.000461681	0.000536769	0.000855432	0.000471254	0.0130826
1436	18S 523	0.000927644	0.000537634	0	0	0.0130826
1437	18S 524	0.00231374	0	0.0017094	0.00423729	0.0130826
1438	18S 525	0.00414938	0.00481799	0.000853971	0.00328638	0.0130826
1439	18S 526	0.000460829	0.000535045	0.00170503	0.000938086	0.0130826
1440	18S 527	0.00138058	0.00585106	0.00170213	0	0.0128411
1441	18S 528	0	0.000532198	0	0	0.0128411
1442	18S 529	0.000460617	0.00106326	0	0.000469263	0.0128411
1443	18S 530	0.000460405	0	0	0	0.00792541
1444	18S 531	0.000919963	0.00106213	0	0	0.00672202
1445	18S 532	0.000459982	0.000530786	0	0.000937646	0.00660905
1446	18S 533	0.000919118	0.000530504	0	0.000468604	0.00660905
1447	18S 534	0.00183486	0.0026455	0.000853971	0.00093633	0.00660905
1448	18S 535	0.0018315	0.00263852	0	0.000467946	0.00687285
1449	18S 536	0.000914913	0	0.000853242	0.000467727	0.00727412
1450	18S 537	0.000457247	0	0	0	0.00846192
1451	18S 538	0.000915751	0.00315956	0.000853242	0	0.00887137
1452	18S 539	0.000458926	0	0	0.000469704	0.0100048
1453	18S 540	0.00183655	0.00105988	0.000859845	0	0.0113524
1454	18S 541	0.0123063	0.0152311	0.00344531	0.00283019	0.0129615
1455	18S 542	0.0874685	0.092137	0.0545455	0.0305414	0.0152555
1456	18S 543	0.0369768	0.0358807	0.0336808	0.0507726	0.0152555
1457	18S 544	0.00817908	0.00846614	0.0103806	0.00947867	0.0156919
1458	18S 545	0.0213397	0.0179641	0.0248538	0.00216606	0.0156919
1459	18S 546	0.00328299	0.00222058	0.00704225	0	0.0156919
1460	18S 547	0.00197239	0	0	0	0.0156919
1461	18S 548	0.00198807	0.000750188	0	0	0.0156919
1462	18S 549	0	0.000751315	0	0	0.0154096
1463	18S 550	0.00199071	0	0	0.00087184	0.0154096
1464	18S 551	0.00920447	0.00746826	0.00372439	0.00087108	0.0154096
1465	18S 552	0.00912052	0.00888889	0.00371058	0.00174064	0.0154096
1466	18S 553	0.00260078	0	0	0	0.0140078
1467	18S 554	0	0.000740192	0	0.00260417	0.0178218
1468	18S 555	0.00584036	0.00369276	0.0037037	0.0112263	0.0178218
1469	18S 556	0.00462963	0.00374532	0.00392927	0.000907441	0.0178218
1470	18S 557	0.00416956	0.00160256	0	0.00103734	0.0178218
1471	18S 558	0.00215983	0.00331675	0	0	0.0199005
1472	18S 559	0	0.00165563	0.00241546	0	0.0199005
1473	18S 560	0.000720461	0.00165426	0	0	0.0199005
1474	18S 561	0.00143885	0.000826446	0.00243902	0	0.0200501
1475	18S 562	0.00358423	0.000825764	0.00243309	0	0.0200501
1476	18S 563	0.00499287	0.00329218	0.00242718	0	0.0200501
1477	18S 564	0.000712758	0	0	0	0.0200501
1478	18S 565	0.000712251	0.000822368	0	0	0.0200501
1479	18S 566	0.000711744	0.00327869	0	0.00114679	0.0199501
1480	18S 567	0.00425532	0.00326797	0.00722892	0.00114548	0.0199501
1481	18S 568	0.00141643	0.00244698	0	0	0.0199501
1482	18S 569	0.00141443	0.000814996	0.00240385	0.0124434	0.0218447
1483	18S 570	0.00635593	0.000817661	0.00959233	0.0328228	0.0280374
1484	18S 571	0.000705716	0.000817661	0.00239234	0	0.0280374
1485	18S 572	0	0.000816993	0	0	0.0280374
1486	18S 573	0.000705219	0	0.00238663	0	0.0280374
1487	18S 574	0.00211715	0.000818331	0.00479616	0.00110011	0.0280374
1488	18S 575	0.00211416	0.00407498	0.00239808	0	0.0194647
1489	18S 576	0.00908456	0.00487409	0.0143198	0.00439078	0.0191011
1490	18S 577	0.00421644	0.00571429	0.00243902	0.00111111	0.0191011
1491	18S 578	0.00430725	0.00496689	0.00501253	0	0.0191011
1492	18S 579	0.0190813	0.013923	0.0293399	0.00803674	0.0178571
1493	18S 580	0.0263736	0.0410172	0.0394737	0.0245098	0.021879
1494	18S 581	0.014275	0.0141431	0.00554017	0.00646831	0.021879
1495	18S 582	0.00924499	0.0118143	0.0204678	0.0165062	0.028754
1496	18S 583	0.000772798	0	0	0	0.028754
1497	18S 584	0.00461894	0.00254022	0.0146199	0.0526316	0.028754
1498	18S 585	0.00763942	0.00169348	0.00869565	0.0417193	0.028754
1499	18S 586	0.00152555	0.00253378	0	0.00252207	0.028754
1500	18S 587	0.00152323	0.000843882	0	0	0.0232558
1501	18S 588	0	0	0	0.00125945	0.0232558
1502	18S 589	0.00152091	0	0	0	0.0232558
1503	18S 590	0.0186567	0.00753769	0.017094	0.121681	0.0232558
1504	18S 591	0.00519673	0.005	0	0.0269107	0.0351351
1505	18S 592	0.0161527	0.0156507	0.0196078	0.00752688	0.0351351
1506	18S 593	0.0159074	0.0273092	0.0380435	0.00642398	0.0351351
1507	18S 594	0.0121429	0.0189125	0.026455	0.019937	0.0351351
1508	18S 595	0.000715308	0.00314465	0.00526316	0	0.0351351
1509	18S 596	0.00356379	0.00313725	0.0052356	0.00314136	0.0268817
1510	18S 597	0.0181945	0.0131579	0.0205128	0.00520833	0.0268817
1511	18S 598	0.0339213	0.0256798	0.0395062	0.0113636	0.0268817
1512	18S 599	0.0906848	0.0984279	0.199203	0.124088	0.0268817
1513	18S 600	0.0514921	0.0444154	0.0720887	0.0117223	0.0268817
1514	18S 601	0.133806	0.17288	0.214804	0.129513	0.0245536
1515	18S 602	0.0468599	0.0497947	0.0561644	0.0146945	0.0245536
1516	18S 603	0.0456432	0.0520681	0.0407359	0.0256217	0.0254372
1517	18S 604	0.017671	0.0082086	0.0129702	0.00825206	0.0254372
1518	18S 605	0.0375055	0.0412037	0.042236	0.00299177	0.0254372
1519	18S 606	0.0184075	0.022182	0.0206813	0.00149365	0.0254372
1520	18S 607	0.00468683	0.00540297	0.00725514	0.00223547	0.0280236
1521	18S 608	0.00928662	0.00715244	0.00600962	0.00223048	0.0304348
1522	18S 609	0.000843526	0	0.00120048	0	0.0304348
1523	18S 610	0.00210438	0.00489324	0.00119904	0.000742942	0.0304348
1524	18S 611	0.00460829	0.00662837	0.0011976	0	0.0510067
1525	18S 612	0.00083717	0	0.00119617	0.000742391	0.0510067
1526	18S 613	0.00083647	0	0.00119474	0.00148258	0.0510067
1527	18S 614	0.00208681	0.000883002	0.00119332	0.00516224	0.0510067
1528	18S 615	0.0208418	0.0126417	0.019883	0.130853	0.0510067
1529	18S 616	0.0176778	0.0146174	0.0150115	0.0126662	0.0473062
1530	18S 617	0.00638723	0.00936968	0.00915332	0.00189633	0.0371287
1531	18S 618	0.012224	0.0228881	0.00681818	0.000631712	0.0371287
1532	18S 619	0.0735725	0.106185	0.0816754	0.04474	0.0371287
1533	18S 620	0.0850636	0.0811366	0.0869981	0.0218805	0.0328867
1534	18S 621	0.00928998	0.0148398	0.0122757	0.00353565	0.0322196
1535	18S 622	0.0121471	0.0123457	0.0037843	0.00294811	0.0427163
1536	18S 623	0.00425254	0.00465426	0.0075188	0.00058997	0.0512017
1537	18S 624	0.000653808	0.000664452	0	0	0.0523077
1538	18S 625	0	0	0.000938967	0.00117855	0.0523077
1539	18S 626	0.0022831	0.00198939	0.000938086	0.00117716	0.0523077
1540	18S 627	0.00130293	0.000662691	0	0	0.0523077
1541	18S 628	0.000325627	0.00231405	0	0.00293427	0.0523077
1542	18S 629	0.0022742	0.00263765	0.00559701	0.00409117	0.0372849
1543	18S 630	0.0051713	0.00687623	0.010157	0.0166667	0.0341131
1544	18S 631	0.00257898	0.00130804	0.00459559	0.00286533	0.0236295
1545	18S 632	0.00321337	0.00228385	0.000918274	0.00228702	0.0187441
1546	18S 633	0.00256492	0.00227939	0.00275229	0	0.0184739
1547	18S 634	0.00160102	0.00162655	0.00091659	0	0.0163532
1548	18S 635	0.00319183	0.00388853	0.00546946	0.00229358	0.0159939
1549	18S 636	0.00667302	0.00580458	0.00815956	0.00286533	0.0159939
1550	18S 637	0.00158629	0.00160979	0.00451671	0.00739477	0.0144928
1551	18S 638	0.0028472	0.00288925	0.000902527	0.00396601	0.0162842
1552	18S 639	0.000632311	0.00160256	0	0	0.0162842
1553	18S 640	0	0	0	0.000566572	0.0162842
1554	18S 641	0.00189334	0.000960615	0.000901713	0.00113186	0.0162842
1555	18S 642	0.00188976	0.000320102	0	0	0.0162842
1556	18S 643	0.000629525	0	0	0.000565611	0.0149466
1557	18S 644	0.000314663	0	0	0	0.0155039
1558	18S 645	0	0	0.00180018	0.000565291	0.0198426
1559	18S 646	0.0009431	0.00032	0.000899281	0.000564972	0.0216509
1560	18S 647	0.000314268	0	0.000898473	0	0.022973
1561	18S 648	0.00188206	0.000959079	0	0	0.0257171
1562	18S 649	0	0	0	0	0.0257171
1563	18S 650	0.000313578	0	0	0	0.0257171
1564	18S 651	0.00125431	0.00159744	0.00179372	0	0.0257171
1565	18S 652	0.000940439	0.00063857	0.000896861	0	0.0257171
1566	18S 653	0.00156495	0	0	0.000566572	0.0228758
1567	18S 654	0	0	0	0	0.0176101
1568	18S 655	0.0105328	0.00508582	0.00536193	0.00226244	0.0176101
1569	18S 656	0.00123762	0	0	0	0.020526
1570	18S 657	0.00123609	0.000952683	0.0026738	0.00112994	0.020526
1571	18S 658	0.000617665	0.000634719	0	0.000564653	0.020526
1572	18S 659	0.000308737	0	0.00177936	0.00112867	0.020526
1573	18S 660	0.000617284	0.00221659	0.00618921	0.00169109	0.020526
1574	18S 661	0.0118939	0.0106516	0.0148342	0.00504767	0.022673
1575	18S 662	0.0238166	0.0440252	0.0312764	0.00557724	0.0243902
1576	18S 663	0.0331031	0.0776243	0.0451977	0.0115766	0.0247245
1577	18S 664	0.0315026	0.0530997	0.0520275	0.0325333	0.0255207
1578	18S 665	0.0123899	0.024496	0.0282528	0.0126382	0.0255207
1579	18S 666	0.00547645	0.00431911	0.0103017	0.00471698	0.0255207
1580	18S 667	0.00490463	0.00856423	0.00512445	0.0103734	0.0255207
1581	18S 668	0.000544662	0.000755097	0	0.00207039	0.0255207
1582	18S 669	0.00163132	0.00150792	0.00291971	0.00206612	0.0249645
1583	18S 670	0.00108637	0.000251256	0.00145773	0	0.0233696
1584	18S 671	0.00189753	0.00150527	0	0.00103199	0.0206522
1585	18S 672	0.00162382	0.00150301	0.00218182	0.00103093	0.0190918
1586	18S 673	0.00242981	0.00349476	0.00506512	0.00665643	0.0179856
1587	18S 674	0.00134807	0.000748316	0.00144509	0	0.0179856
1588	18S 675	0	0.000249377	0	0	0.0179856
1589	18S 676	0.0010773	0.000996512	0.001443	0.000511771	0.0158181
1590	18S 677	0.00161334	0.00149254	0.00144092	0	0.0158181
1591	18S 678	0.0274582	0.0752243	0.0506156	0.0161128	0.0168837
1592	18S 679	0.0194872	0.0437747	0.0394218	0.0269476	0.0168837
1593	18S 680	0.0126582	0.0189942	0.0237332	0.0121007	0.0168837
1594	18S 681	0.0200943	0.0317659	0.0400246	0.0236295	0.0168837
1595	18S 682	0.00321464	0.00208551	0.00429185	0.00188679	0.0168837
1596	18S 683	0.000494438	0.000833507	0	0.00562852	0.0153203
1597	18S 684	0.00344913	0.00145651	0.00122549	0.0170586	0.0153203
1598	18S 685	0.00294768	0.00331813	0.00244499	0.000921234	0.0145322
1599	18S 686	0.000491039	0.00103584	0.000610874	0.000920387	0.0145322
1600	18S 687	0.000981114	0.000207125	0.000610501	0	0.0137112
1601	18S 688	0.0026908	0.00165426	0.000610128	0	0.0136116
1602	18S 689	0.00341297	0.00165153	0.00425273	0.000459982	0.0160173
1603	18S 690	0.0144161	0.00697007	0.0173134	0.00045977	0.0160173
1604	18S 691	0.0460692	0.0277058	0.0493757	0.00865998	0.0160173
1605	18S 692	0.049041	0.0244993	0.040305	0.0103744	0.0160173
1606	18S 693	0.01142	0.00771754	0.0129032	0.00314748	0.0160173
1607	18S 694	0.00471799	0.00173344	0.00268097	0.000449438	0.0141431
1608	18S 695	0.00235496	0.00192271	0.00214133	0.0013471	0.0141431
1609	18S 696	0.000428082	0.000768639	0.000535045	0.00134529	0.0141431
1610	18S 697	0.00106906	0.000384172	0.000534759	0.00800712	0.0144092
1611	18S 698	0.00128123	0.000959509	0.00106838	0.00398759	0.0148178
1612	18S 699	0.00191816	0.000958589	0.000533903	0	0.0148178
1613	18S 700	0.000213083	0.000383289	0	0.00044287	0.0148178
1614	18S 701	0.000425985	0.000383142	0.000533618	0	0.0148178
1615	18S 702	0.00191327	0.000382995	0.00212993	0.00132685	0.0148178
1616	18S 703	0.00127389	0.000191461	0	0.000442087	0.0128566
1617	18S 704	0.000212269	0	0	0.000883392	0.0127512
1618	18S 705	0.000212224	0.000956389	0.00106383	0.00132333	0.0127512
1619	18S 706	0.00232903	0.000382409	0.00212314	0.000440917	0.0127512
1620	18S 707	0.00190194	0.0022892	0.0026469	0.000440723	0.0127512
1621	18S 708	0.000844595	0.000381388	0.000529101	0.000440529	0.0127512
1622	18S 709	0.000211104	0	0.00105764	0.000880669	0.0121534
1623	18S 710	0.000843704	0.000381243	0.000528541	0	0.0127103
1624	18S 711	0.000842993	0.000190585	0.000528262	0	0.0127103
1625	18S 712	0.00126289	0.000571429	0	0.000440335	0.0127103
1626	18S 713	0.00189076	0.000571102	0.00315956	0.000440335	0.0127103
1627	18S 714	0.00125892	0.000570776	0	0	0.0127103
1628	18S 715	0.0023027	0.000380373	0.00314961	0.000879894	0.0119181
1629	18S 716	0	0.00019015	0	0	0.0117302
1630	18S 717	0.000836645	0.000190114	0.000524659	0.000879121	0.0143021
1631	18S 718	0.00146199	0.0017081	0.00313808	0.00175516	0.0143021
1632	18S 719	0.000626174	0.00132676	0.00104493	0.00175208	0.0150289
1633	18S 720	0.00125078	0.00094679	0.003125	0.000437828	0.0172414
1634	18S 721	0.000625	0.00151257	0	0.00131176	0.0289532
1635	18S 722	0.00290818	0.00151029	0.002079	0.000873744	0.0289532
1636	18S 723	0.000622794	0.000754575	0	0	0.0289532
1637	18S 724	0.000829703	0.000188608	0.00207469	0.000872981	0.0289532
1638	18S 725	0.00248293	0.00113037	0.0015536	0.00087222	0.0289532
1639	18S 726	0.000206868	0.000376648	0	0	0.0215169
1640	18S 727	0.000206825	0.000188288	0	0	0.0154321
1641	18S 728	0	0	0	0	0.0154321
1642	18S 729	0.00144568	0.000752587	0.00103466	0.00130662	0.0154321
1643	18S 730	0.000619195	0	0	0	0.0154321
1644	18S 731	0.000412626	0.000376152	0	0	0.0183393
1645	18S 732	0.00123635	0.000376011	0.00154959	0.00043535	0.0221893
1646	18S 733	0.00185109	0.000375869	0.00257599	0	0.0305635
1647	18S 734	0.00164271	0.000751174	0.00256937	0.000435161	0.0305635
1648	18S 735	0.00102564	0.00075061	0	0.000434972	0.0305635
1649	18S 736	0.00081984	0.000562641	0	0.00173686	0.0305635
1650	18S 737	0.00428571	0.00187196	0.00714286	0.0183291	0.0305635
1651	18S 738	0.00203666	0.00130866	0.00203666	0.00466695	0.0281365
1652	18S 739	0.0012205	0.000933881	0	0.00127119	0.0226433
1653	18S 740	0.00887097	0.00260805	0.0110775	0.00169205	0.0215343
1654	18S 741	0.00461569	0.00241591	0.00550826	0.00755668	0.0173437
1655	18S 742	0.00320064	0.00333395	0.00547809	0.0116183	0.0144042
1656	18S 743	0.00418327	0.00147956	0.00347395	0.00413223	0.0134141
1657	18S 744	0.00178998	0	0.000496032	0.00165085	0.0134141
1658	18S 745	0.00198491	0.00276651	0.00346192	0.00451931	0.0134141
1659	18S 746	0.020035	0.0118462	0.0288184	0.0934823	0.0134141
1660	18S 747	0.00116573	0.00200073	0	0.0106853	0.0128535
1661	18S 748	0.00213261	0.00109012	0.00191755	0.00330518	0.0129436
1662	18S 749	0.00116189	0.000907606	0.0023912	0.000733945	0.0192939
1663	18S 750	0.00500963	0.00181192	0.00617871	0.0018315	0.0225564
1664	18S 751	0.00326484	0.00198915	0.00237079	0.00146306	0.0225564
1665	18S 752	0.00591829	0.0037831	0.0061263	0.00182548	0.0225564
1666	18S 753	0.00380373	0.0039476	0.00375587	0.00218579	0.0225564
1667	18S 754	0.00246633	0.00161233	0.00513779	0.00218102	0.0225564
1668	18S 755	0.00528402	0.00534569	0.00649652	0.00470333	0.0202381
1669	18S 756	0.00469572	0.00408163	0.00645459	0.00144509	0.0160122
1670	18S 757	0.0104089	0.00687346	0.0127447	0.00216294	0.0132554
1671	18S 758	0.00296516	0.00228592	0.00362812	0.00036036	0.0127364
1672	18S 759	0.00185014	0.00122958	0.000906208	0.0021575	0.0130157
1673	18S 760	0.00424041	0.00455262	0.0112057	0.0159518	0.0130157
1674	18S 761	0.0012889	0.00017507	0.00178971	0.00212239	0.0130157
1675	18S 762	0.00220588	0.00069979	0.00267738	0.000353607	0.0130157
1676	18S 763	0.000734754	0.000699301	0.0013369	0.0010597	0.0130157
1677	18S 764	0	0.000698812	0.000890472	0	0.0126152
1678	18S 765	0.0009176	0.000523834	0.00088968	0.00105857	0.0126152
1679	18S 766	0.00238008	0.0024386	0.00221926	0.00246392	0.0126152
1680	18S 767	0.0058256	0.005026	0.0144357	0.0052521	0.0121893
1681	18S 768	0.00884157	0.00414365	0.0159277	0.0976303	0.0121893
1682	18S 769	0.00752284	0.00327022	0.0119098	0.0463995	0.0123318
1683	18S 770	0.00375469	0.00292498	0.0059448	0.00421306	0.0139567
1684	18S 771	0.00249732	0.00223176	0.00169563	0.000601685	0.0139567
1685	18S 772	0.00106971	0.000515021	0.000424268	0.000903342	0.0139567
1686	18S 773	0.00124644	0.00034323	0.00127119	0.00509287	0.0139567
1687	18S 774	0.00954738	0.0056391	0.0101053	0.0875171	0.0139567
1688	18S 775	0.00264504	0.00187617	0.00293871	0.00599945	0.013222
1689	18S 776	0.00158451	0.000341006	0.0029301	0.00217687	0.0130629
1690	18S 777	0.000881834	0.000341588	0.000838926	0.00136314	0.012008
1691	18S 778	0.00369069	0.00187553	0.00334448	0.00136129	0.0121232
1692	18S 779	0.00420242	0.00373768	0.00458524	0.00487805	0.0134162
1693	18S 780	0.023471	0.0229579	0.0548973	0.0499871	0.0134762
1694	18S 781	0.0111881	0.0133929	0.022104	0.0122917	0.0137518
1695	18S 782	0.00548847	0.0044342	0.00635863	0.00542083	0.0137518
1696	18S 783	0.000366032	0	0.00127065	0.0022792	0.0137518
1697	18S 784	0.000367444	0.000533618	0.00169635	0.000860092	0.0137518
1698	18S 785	0.00128464	0.000888731	0.00338553	0.000860338	0.0137518
1699	18S 786	0.000366905	0.000355492	0.000845666	0.00057323	0.0125531
1700	18S 787	0.00401973	0.00301312	0.00713686	0.00143102	0.0115504
1701	18S 788	0.00635439	0.00318021	0.00832639	0.00114351	0.0149978
1702	18S 789	0.01414	0.00910364	0.0211899	0.00455322	0.0149978
1703	18S 790	0.00196499	0.00122399	0.00203335	0.0042505	0.0149978
1704	18S 791	0.0249086	0.0166781	0.0413255	0.104087	0.0149978
1705	18S 792	0.00794885	0.00547289	0.0119691	0.0223436	0.0149978
1706	18S 793	0.0227964	0.0118303	0.0353817	0.0929971	0.0122871
1707	18S 794	0.00336587	0.0033687	0.00444939	0.0080411	0.0122871
1708	18S 795	0.00469012	0.00302419	0.00442968	0.0088574	0.0122871
1709	18S 796	0.015014	0.00501504	0.015625	0.0373055	0.0117221
1710	18S 797	0.0115786	0.00532092	0.00971572	0.00614407	0.0106318
1711	18S 798	0.00454545	0.0026534	0.00679056	0.0282067	0.0106318
1712	18S 799	0.0358429	0.0150278	0.064214	0.24942	0.0106318
1713	18S 800	0.00296504	0.00195631	0.00466045	0.0167148	0.0106318
1714	18S 801	0.00171366	0	0.00298706	0.00348274	0.0118514
1715	18S 802	0.00186596	0.00243942	0.00231788	0.00196464	0.0118514
1716	18S 803	0.0015528	0.000487646	0.00165289	0.000453172	0.0118514
1717	18S 804	0.00525178	0.00340246	0.00689429	0.00271166	0.0118514
1718	18S 805	0.0100917	0.00675893	0.0142395	0.0255432	0.0118514
1719	18S 806	0.00289855	0.00192988	0.0029051	0.00598365	0.0117535
1720	18S 807	0.00952237	0.00608097	0.00927703	0.00203963	0.0117535
1721	18S 808	0.00241291	0.00143816	0.00223428	0.00247057	0.00909661
1722	18S 809	0.00465326	0.00223285	0.00539683	0.00592314	0.00822004
1723	18S 810	0.00269461	0.00143381	0.000951475	0.0017306	0.00706605
1724	18S 811	0.00119617	0.00143198	0.00126703	0.000144196	0.00706605
1725	18S 812	0.00357569	0.00522317	0.00347222	0.000432401	0.00560398
1726	18S 813	0.000595593	0.000790764	0.000630915	0.000144113	0.00637774
1727	18S 814	0.00474215	0.00189424	0.00502197	0.000720046	0.00769889
1728	18S 815	0.00221795	0.000788644	0.000940734	0.000431841	0.00769889
1729	18S 816	0.000591104	0.000472962	0.00031348	0	0.00769889
1730	18S 817	0.0025059	0.00329981	0.00187735	0.000719217	0.00769889
1731	18S 818	0.00132489	0.000314169	0.000312793	0.000287604	0.00769889
1732	18S 819	0.00483516	0.00203826	0.0046729	0.000718597	0.00701557
1733	18S 820	0.00394046	0.00172171	0.00248602	0.00143513	0.0071912
1734	18S 821	0.00102056	0.00140669	0.000621118	0.000717052	0.0071912
1735	18S 822	0.000582836	0.0003125	0.00155039	0.000286738	0.0071912
1736	18S 823	0.00189063	0.00078064	0.00247448	0.00128866	0.0071912
1737	18S 824	0.00420107	0.000780031	0.00154464	0.000286287	0.0071912
1738	18S 825	0.000289645	0.0004678	0.000308833	0.000429246	0.0062613
1739	18S 826	0.00130171	0.000623344	0.00123381	0.000143062	0.00592368
1740	18S 827	0.000433714	0.000155812	0.000308356	0	0.00566657
1741	18S 828	0.0023078	0.000155788	0.00246078	0.000429	0.00566657
1742	18S 829	0.00886347	0.00434311	0.00702505	0.00526316	0.00734646
1743	18S 830	0.00199743	0.00185787	0.00425791	0.000994742	0.00734646
1744	18S 831	0.003129	0.000618908	0.00151837	0.000284131	0.00734646
1745	18S 832	0.00354308	0.00200741	0.00363086	0.000851668	0.00734646
1746	18S 833	0.000283366	0	0.00030248	0	0.00734646
1747	18S 834	0.0018385	0.000617284	0.000302389	0.00070922	0.00698287
1748	18S 835	0.00098898	0	0.000604412	0.000425351	0.00698287
1749	18S 836	0.000564812	0.000925069	0.000302115	0.000283487	0.00640683
1750	18S 837	0.000846501	0	0.000905524	0.000141723	0.00634333
1751	18S 838	0.000845785	0.00123191	0.000904704	0.000566572	0.00572902
1752	18S 839	0.00126707	0.000461752	0.00240674	0.000566251	0.00572902
1753	18S 840	0.00196712	0.00061529	0.000601323	0.000424508	0.00625889
1754	18S 841	0.000421348	0.0010756	0.000901172	0.000282925	0.00981217
1755	18S 842	0.00014043	0.000614251	0.00060042	0.0023991	0.0167905
1756	18S 843	0.00112218	0.000460476	0.0011994	0.00295483	0.0168788
1757	18S 844	0.00251854	0.00137952	0.0035853	0.00851004	0.0208333
1758	18S 845	0.00167621	0.000306466	0.000597193	0.000418352	0.0208333
1759	18S 846	0.000139665	0.00015321	0.000298507	0.000278823	0.0208333
1760	18S 847	0.00139528	0.00168505	0.00238379	0.000418118	0.0208333
1761	18S 848	0.00139334	0.000306279	0.00178465	0.0112994	0.0208333
1762	18S 849	0.00166922	0.000918133	0.00089153	0.0114426	0.0176502
1763	18S 850	0.0248506	0.0109157	0.0347402	0.164313	0.0118471
1764	18S 851	0.00649878	0.00304925	0.00772975	0.0131846	0.0136422
1765	18S 852	0.0016225	0.000152509	0.00114384	0.00325769	0.0161943
1766	18S 853	0.00269724	0.00167504	0.00427107	0.00380483	0.019568
1767	18S 854	0.0131508	0.010215	0.021032	0.0564918	0.0259708
1768	18S 855	0.00361639	0.00259582	0.00196188	0.00883374	0.0299197
1769	18S 856	0.00585885	0.00365186	0.00612984	0.0027268	0.0321497
1770	18S 857	0.00133103	0.000457038	0.00194715	0.0012572	0.0321497
1771	18S 858	0.00119729	0.000609663	0.000556483	0.000314399	0.0321497
1772	18S 859	0.00291816	0.00228241	0.00443459	0.00094231	0.0321497
1773	18S 860	0.00132485	0.000912548	0.00193638	0.000314005	0.0321497
1774	18S 861	0.00409565	0.00243198	0.00413451	0.00645027	0.0299864
1775	18S 862	0.00197837	0.000759878	0.00521262	0.00301017	0.0259654
1776	18S 863	0.00354843	0.00242645	0.00246305	0.00134757	0.0253502
1777	18S 864	0.000656771	0.000757691	0.000273598	0.00258478	0.0196078
1778	18S 865	0.000656426	0.000605785	0.00109319	0.00257812	0.013563
1779	18S 866	0.00340359	0.000907853	0.00136463	0.000412329	0.00956226
1780	18S 867	0.000263089	0.000458155	0.000273823	0	0.00810926
1781	18S 868	0.000131683	0.000153398	0.000547945	0	0.00771704
1782	18S 869	0.00293021	0.00125215	0.00388457	0.000417058	0.00664381
1783	18S 870	0.000676498	0.000640512	0	0.000210349	0.00645439
1784	18S 871	0.00300014	0.00162259	0.0034004	0.000739332	0.00729301
1785	18S 872	0.000965118	0.000165071	0.000286451	0.000106191	0.00811404
1786	18S 873	0.00169731	0.000516173	0.00117855	0.000537982	0.0101166
1787	18S 874	0	0.000350877	0.000297265	0.000108389	0.0101166
1788	18S 875	0.000757461	0.000380156	0.000944287	0.000334113	0.0101166
1789	18S 876	0.000624317	0	0.000646204	0.000226219	0.0101166
1790	18S 877	0.00379087	0.0012012	0.00521003	0.000456361	0.0142791
1791	18S 878	0.00205631	0.00060423	0.0035819	0.000914808	0.0142791
1792	18S 879	0.00343137	0.00126263	0.00670691	0.000812631	0.0142791
1793	18S 880	0.00348201	0.00128452	0.00272016	0.00256919	0.0142791
1794	18S 881	0.0145655	0.00659196	0.0234455	0.0473446	0.0142791
1795	18S 882	0.0044293	0.00112969	0.00486957	0.00467183	0.0126401
1796	18S 883	0.000978474	0.000794071	0.00533443	0.00293399	0.0162626
1797	18S 884	0.0240091	0.011683	0.0361098	0.0569205	0.0164084
1798	18S 885	0.0042333	0.00232172	0.00500751	0.00531192	0.0178187
1799	18S 886	0.00353107	0.00267917	0.00749625	0.00173224	0.0203654
1800	18S 887	0.0175845	0.0197174	0.0229604	0.017868	0.0203654
1801	18S 888	0.00207804	0.00164042	0.005345	0.00194128	0.0203654
1802	18S 889	0.00482537	0.00196464	0.00723589	0.000969697	0.02364
1803	18S 890	0.0164972	0.00844156	0.0203214	0.0431454	0.02364
1804	18S 891	0.00337838	0.000973078	0.00797	0.010217	0.02364
1805	18S 892	0.00470746	0.00323311	0.008829	0.00251918	0.02364
1806	18S 893	0.00335121	0.00354381	0.00324224	0.000800915	0.02364
1807	18S 894	0.00111582	0.00160823	0.00184928	0.000343132	0.0234768
1808	18S 895	0.000891862	0.00064288	0.000923788	0.000228702	0.0182115
1809	18S 896	0.0048813	0.00160462	0.00642497	0.00171233	0.0143904
1810	18S 897	0.00110816	0.000961847	0.002746	0.00465856	0.00974553
1811	18S 898	0.00835165	0.00383264	0.0108646	0.0206989	0.00872093
1812	18S 899	0.00306883	0.0015949	0.00225836	0.00122277	0.00883117
1813	18S 900	0.00240542	0.00317965	0.00404858	0.000888593	0.00883117
1814	18S 901	0.0032694	0.00127065	0.00179614	0.000444099	0.0103986
1815	18S 902	0.00455729	0.00190235	0.00357942	0.000554816	0.0128317
1816	18S 903	0.00367647	0.00221589	0.00445434	0.000554631	0.0128317
1817	18S 904	0.0319596	0.0269767	0.0537452	0.00859788	0.0128317
1818	18S 905	0.033374	0.0348767	0.0761381	0.0138224	0.0128317
1819	18S 906	0.00560631	0.00774234	0.0147059	0.00252664	0.0128317
1820	18S 907	0.0348767	0.0531415	0.0736648	0.0195043	0.011371
1821	18S 908	0.0111821	0.0102639	0.0228758	0.00409439	0.011371
1822	18S 909	0.00713719	0.00641212	0.0107759	0.00236483	0.011371
1823	18S 910	0.00138586	0.0031986	0.00215131	0.000644538	0.011371
1824	18S 911	0.000988924	0.00203134	0.00178955	0.000322165	0.0106291
1825	18S 912	0.000197746	0.000869817	0.000357782	0.000107377	0.0100277
1826	18S 913	0.00118507	0.00115841	0.000357654	0.000107365	0.00884769
1827	18S 914	0.00118367	0.000289519	0.00142857	0.000214684	0.00830664
1828	18S 915	0.00607843	0.0034622	0.010251	0.00320993	0.00711201
1829	18S 916	0.00565412	0.00258993	0.00317125	0.000748423	0.00694858
1830	18S 917	0.000973899	0.00172364	0.0021097	0.000427487	0.00605144
1831	18S 918	0.000972952	0.000574218	0.00280505	0.000213698	0.00605144
1832	18S 919	0.00753187	0.00627675	0.00592541	0.00594796	0.00566849
1833	18S 920	0.0028885	0.000855188	0.00381944	0.000424674	0.00622129
1834	18S 921	0.000961908	0.000569801	0.000347102	0.000212292	0.00622129
1835	18S 922	0.000768935	0.000853971	0.00138648	0.000106135	0.00622129
1836	18S 923	0.00115207	0.00056899	0.0017301	0.000318302	0.00622129
1837	18S 924	0.00134228	0.000568666	0.00207182	0.000318201	0.00622129
1838	18S 925	0.00153169	0.000568343	0.000690131	0.000106056	0.00581014
1839	18S 926	0.00590027	0.00621293	0.00956938	0.00105943	0.0066437
1840	18S 927	0.00133055	0.000846501	0.00102424	0.000105932	0.00738007
1841	18S 928	0.0041643	0.00728291	0.00644505	0.00126957	0.00846842
1842	18S 929	0.00974695	0.00805779	0.0160214	0.00410916	0.00846842
1843	18S 930	0.0875663	0.0680994	0.140809	0.00189294	0.00846842
1844	18S 931	0.0173109	0.00847458	0.0169157	0.00293593	0.00846842
1845	18S 932	0.00816803	0.00434671	0.00588565	0.00167487	0.00846842
1846	18S 933	0.10928	0.0614351	0.0705913	0.0199036	0.00740741
1847	18S 934	0.00955882	0.00548926	0.00569801	0.00266039	0.00716503
1848	18S 935	0.00264007	0.000715478	0.00180972	0.00112428	0.00716503
1849	18S 936	0.00161078	0.00119104	0	0.000510777	0.0068364
1850	18S 937	0.000877835	0.00047619	0.000258465	0.000102145	0.0068364
1851	18S 938	0.00102309	0.00118906	0.00154839	0.000204248	0.00592277
1852	18S 939	0.0017508	0.000950344	0.00308721	0.0010202	0.00549451
1853	18S 940	0.00681159	0.00213422	0.0079122	0.00274697	0.00588918
1854	18S 941	0.0044733	0.00118427	0.00229183	0.00111789	0.00592501
1855	18S 942	0.00144092	0.000473485	0.00127162	0.000609385	0.00640455
1856	18S 943	0.00301724	0.000946074	0.0030426	0.0107538	0.00675202
1857	18S 944	0.0202703	0.0167442	0.0319097	0.100606	0.00675202
1858	18S 945	0.00518498	0.00440019	0.0048852	0.00655649	0.00675202
1859	18S 946	0.00195804	0.00323251	0.000732243	0.00188307	0.00675202
1860	18S 947	0.00195422	0.00253339	0.000731886	0.000268938	0.00675202
1861	18S 948	0.000976154	0.000230256	0.00121832	0.000268865	0.00643255
1862	18S 949	0.000139431	0.000460299	0.000243605	0.00152125	0.0067256
1863	18S 950	0.000418118	0.000230097	0.00121655	0.00285536	0.00816326
1864	18S 951	0.00319533	0.00183739	0.00387785	0.0104194	0.00816326
1865	18S 952	0.00318515	0.000918063	0.00362231	0.00061772	0.00897465
1866	18S 953	0.00207297	0.000688073	0.00120598	0.000352858	0.00897465
1867	18S 954	0.000414422	0.000229305	0.000723066	0.000176398	0.00897465
1868	18S 955	0.00903491	0.0054732	0.0142552	0.00430315	0.00897465
1869	18S 956	0.000820681	0.000911369	0.00166034	0.000526639	0.00897465
1870	18S 957	0.00422919	0.00227531	0.00378698	0.00166623	0.00798757
1871	18S 958	0.00395149	0.00136581	0.00377715	0.000701754	0.00686905
1872	18S 959	0.00231513	0.00159272	0.00235905	0.000351154	0.00643275
1873	18S 960	0.000816438	0.000454959	0.000235905	0	0.00594845
1874	18S 961	0.00122316	0.000454752	0.00164861	0.00105235	0.00690761
1875	18S 962	0.000543404	0	0.000706215	0.00113895	0.00690761
1876	18S 963	0.0153826	0.00633198	0.0241213	0.0528587	0.00765027
1877	18S 964	0.00226878	0.00135501	0.00183444	0.00339067	0.00791105
1878	18S 965	0.00213078	0.000225785	0.00228781	0.00239254	0.00938166
1879	18S 966	0.00397931	0.001578	0.00455477	0.00246893	0.00938166
1880	18S 967	0.00671937	0.00269784	0.00521069	0.00106873	0.00938166
1881	18S 968	0.00144718	0.000898473	0.00203482	0.000575138	0.00938166
1882	18S 969	0.00367021	0.00179372	0.0033799	0.00968267	0.00938166
1883	18S 970	0.004047	0.00290633	0.00804649	0.0176645	0.00885702
1884	18S 971	0.00221441	0.00178532	0.00223015	0.00151636	0.00885702
1885	18S 972	0.00195008	0.00044613	0.00111383	0.000558347	0.00885702
1886	18S 973	0.00349786	0.00155902	0.00288761	0.000239234	0.00885702
1887	18S 974	0.0534641	0.0245492	0.0673296	0.015544	0.00805785
1888	18S 975	0.0270818	0.0115954	0.0332465	0.00593101	0.00794783
1889	18S 976	0.005458	0.00321062	0.00418827	0.00124708	0.00794783
1890	18S 977	0.00118511	0.00106906	0.00377508	0.000545341	0.00794783
1891	18S 978	0.00295543	0.00128205	0.00356365	0.000311794	0.00778599
1892	18S 979	0.00329916	0.00170648	0.00531705	0.00038959	0.00978239
1893	18S 980	0.0025855	0.00170358	0.00255353	7.7912e-05	0.0158165
1894	18S 981	0.00223556	0.00128507	0.00255956	0.000782167	0.0203567
1895	18S 982	0.00164512	0.00107043	0.00235942	0.00288657	0.0227054
1896	18S 983	0.0078125	0.00596252	0.0122378	0.0260698	0.0240692
1897	18S 984	0.00140334	0.0012837	0.0017561	0.00160012	0.0240692
1898	18S 985	0.000471754	0.000218436	0.000590087	0.000307479	0.0240692
1899	18S 986	0.0010745	0.000447828	0.000598325	0.000156287	0.0240692
1900	18S 987	0.0010772	0.000225785	0.00160256	0.000392003	0.0240692
1901	18S 988	0.0144106	0.00585718	0.0206571	0.00507812	0.0212606
1902	18S 989	0.00703637	0.00558789	0.00970874	0.00285533	0.015864
1903	18S 990	0.000715734	0.000700444	0.00178147	0.000158667	0.0128731
1904	18S 991	0.00215724	0.00212816	0.00179104	0.000559821	0.0109645
1905	18S 992	0.00397974	0.00169862	0.00241449	0.000566985	0.00952203
1906	18S 993	0.00854579	0.00937082	0.00481	0.000390092	0.0106071
1907	18S 994	0.00176574	0.00251347	0.00149254	0.000303153	0.0106071
1908	18S 995	0.00667854	0.00852168	0.00578908	0.00103178	0.0106071
1909	18S 996	0.00134288	0.00150943	0.00177215	0.00031185	0.0106071
1910	18S 997	0.00193625	0.000377501	0.00202224	0.000415757	0.0106071
1911	18S 998	0.00621762	0.00749906	0.00528036	0.00134939	0.0112334
1912	18S 999	0.00517063	0.00338346	0.00726271	0.00155844	0.0124944
1913	18S 1000	0.00631703	0.0115327	0.0087043	0.0171832	0.0142889
1914	18S 1001	0.0123349	0.00921829	0.0144608	0.0274709	0.0157953
1915	18S 1002	0.0138809	0.0127458	0.0140164	0.00357037	0.0157953
1916	18S 1003	0.0299917	0.0371669	0.022217	0.00237577	0.0159574
1917	18S 1004	0.00989827	0.0121233	0.00843684	0.00237014	0.0159574
1918	18S 1005	0.0163624	0.0263069	0.0222273	0.036445	0.0159574
1919	18S 1006	0.00390625	0.00436535	0.00546946	0.00699367	0.0159574
1920	18S 1007	0.00228464	0.00100637	0.00363306	0.00395369	0.0159574
1921	18S 1008	0.0200184	0.00996678	0.0187166	0.00365819	0.012785
1922	18S 1009	0.00484991	0.00265604	0.00531915	0.000562957	0.0114
1923	18S 1010	0.00117832	0.00066357	0.00154902	0.00112465	0.014237
1924	18S 1011	0.00352388	0.00264988	0.00265018	0.00280531	0.0180505
1925	18S 1012	0.00234375	0.00198347	0.00198369	0.00130743	0.0193447
1926	18S 1013	0.00685818	0.00494234	0.0113463	0.0153591	0.0193447
1927	18S 1014	0.00103426	0.000987817	0.00304546	0.00128594	0.0193447
1928	18S 1015	0.00361851	0.00429185	0.00347675	0.0015648	0.0193447
1929	18S 1016	0.00193598	0.00165017	0.00195355	0.00248185	0.0193447
1930	18S 1017	0.00116024	0.000989446	0.000867491	0.00110203	0.0185436
1931	18S 1018	0.00257169	0.00394218	0.00367329	0.00155877	0.0177903
1932	18S 1019	0.00575374	0.00229433	0.0047322	0.00574398	0.0177903
1933	18S 1020	0.00496183	0.00748211	0.00534874	0.000455705	0.0177903
1934	18S 1021	0.00266464	0.00194805	0.0010686	0.00100155	0.0126183
1935	18S 1022	0.00642965	0.0096463	0.00763521	0.0166532	0.0102922
1936	18S 1023	0.0311469	0.0575758	0.0678402	0.134991	0.0105374
1937	18S 1024	0.0158673	0.0288405	0.016725	0.0153283	0.012474
1938	18S 1025	0.0132875	0.028032	0.0156968	0.00921798	0.0125183
1939	18S 1026	0.0191994	0.041141	0.0174911	0.00120746	0.013838
1940	18S 1027	0.0112747	0.0113883	0.00968523	0.000678733	0.013838
1941	18S 1028	0.00103436	0.00270416	0.00148782	0.000904159	0.013838
1942	18S 1029	0.00103353	0.000270343	0.00111462	0.0013544	0.013838
1943	18S 1030	0.0075248	0.00457604	0.00774194	0.00806271	0.013838
1944	18S 1031	0.00102517	0.000806885	0.00092081	0.00111857	0.0124698
1945	18S 1032	0.000455425	0	0.000919963	7.45657e-05	0.0124698
1946	18S 1033	0.00102366	0.000806235	0.00110274	0.002603	0.0124698
1947	18S 1034	0.000454752	0	0.000367444	0.000743163	0.012145
1948	18S 1035	0.000340948	0.000268673	0.000183688	0.00103935	0.0101801
1949	18S 1036	0.0010218	0	0.00146735	0.000222668	0.00913153
1950	18S 1037	0.000113611	0	0.000367377	0.000148544	0.00797421
1951	18S 1038	0.000113598	0	0	0.000222767	0.00742292
1952	18S 1039	0.000113585	0.000269978	0.000550762	0.000296934	0.00742292
1953	18S 1040	0.000227144	0	0.000183824	0.00022275	0.00742292
1954	18S 1041	0.000114025	0.000283046	0.000369822	0	0.00632669
1955	18S 1042	0.000228128	0.000290529	0.000370233	7.45768e-05	0.00625711
1956	18S 1043	0.000570581	0.000594884	0.00166728	7.46157e-05	0.00595731
1957	18S 1044	0.000342309	0	0.000370508	0.000149231	0.00656847
1958	18S 1045	0	0	0	0	0.0066119
1959	18S 1046	0.00113999	0.00059988	0.000555658	0.000149243	0.0066119
1960	18S 1047	0.000455789	0	0.000185185	7.46157e-05	0.0066119
1961	18S 1048	0.000227842	0.00030021	0.000555247	0.000149209	0.0066119
1962	18S 1049	0.000569411	0.000301659	0.00110926	0.000522037	0.0066119
1963	18S 1050	0.00340561	0.00272068	0.00386883	0.000596481	0.00619504
1964	18S 1051	0.00553172	0.0045208	0.00731529	0.00163764	0.00538512
1965	18S 1052	0.00538962	0.0036036	0.00726216	0.00207993	0.00513631
1966	18S 1053	0.00691347	0.0050944	0.00988675	0.00200163	0.00600601
1967	18S 1054	0.00300568	0.00427481	0.00519806	0.00177738	0.00660396
1968	18S 1055	0.00277593	0.0058318	0.00321946	0.000296252	0.00660396
1969	18S 1056	0.0026581	0.00459277	0.00303192	0	0.0077427
1970	18S 1057	0.00309153	0.0124054	0.00443892	0.000740192	0.0077427
1971	18S 1058	0.00570864	0.135043	0.0108887	0.00162578	0.0077427
1972	18S 1059	0.00946064	0.383312	0.0187834	0.00257979	0.0077427
1973	18S 1060	0.0186746	0.626454	0.038761	0.00564351	0.0077427
1974	18S 1061	0.00867449	0.218884	0.0172554	0.00466881	0.003693
1975	18S 1062	0.0136686	0.0575208	0.0292351	0.00334448	0.00320513
1976	18S 1063	0.000938184	0.00529778	0.00173529	0.000363398	0.00319387
1977	18S 1064	0.000520942	0.00145477	0.000630616	0	0.00319387
1978	18S 1065	0.000312467	0.000924906	0.000315209	0.000145338	0.00270399
1979	18S 1066	0.000104145	0.000396231	0	7.26639e-05	0.00254291
1980	18S 1067	0.000104134	0.000440063	0.00015758	7.26586e-05	0.00254291
1981	18S 1068	0	0.00043987	0	0	0.0023802
1982	18S 1069	0.000104123	8.79662e-05	0.00031506	0.00029055	0.0023802
1983	18S 1070	0	4.39812e-05	0.000314961	0	0.00221659
1984	18S 1071	0	0	0	0	0.00189573
1985	18S 1072	0.000312272	0	0	0	0.00174299
1986	18S 1073	0	0	0.000157456	0	0.00142405
1987	18S 1074	0.00010408	0	0.000157431	0	0.00126582
1988	18S 1075	0	0	0	0	0.00126562
1989	18S 1076	0.000104069	0	0.000157406	7.26322e-05	0.00126283
1990	18S 1077	0	0	0	0	0.00126084
1991	18S 1078	0	0	0	7.26322e-05	0.00126084
1992	18S 1079	0.000208225	0	0	0.000145275	0.00110393
1993	18S 1080	0	0	0	0	0.00110393
1994	18S 1081	0.000208333	0.000131932	0.00047259	0	0.00110393
1995	18S 1082	0	0	0	7.26639e-05	0.00110393
1996	18S 1083	0	0	0	0	0.00094682
1997	18S 1084	0.000104199	0.00013192	0.000157654	0	0.00094682
1998	18S 1085	0.000416623	0	0.000157629	0	0.000829359
1999	18S 1086	0.000104156	0	0.000315159	0	0.00094518
[truncated: 8,001 more rows]
